# Supplementary material for: Azithromycin and survival in Streptococcus pneumoniae pneumonia: a retrospective study
Source: PubMed Central journal article supplement — BMJ Open. 2013 Jun 5;3(6):e002898. doi: 10.1136/bmjopen-2013-002898 (PMC3686221; doi:10.1136/bmjopen-2013-002898), 2013-06-05
Supplement: bmjopen-2013-002898.draft_revisions.pdf [file bmjopen-2013-002898.draft_revisions.pdf]

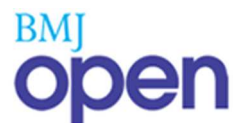

**Azithromycin and Survival In Streptococcus pneumoniae  
Pneumonia: A Retrospective Study**

|                                    |                                                                                                                                                                                                                                                         |
|------------------------------------|---------------------------------------------------------------------------------------------------------------------------------------------------------------------------------------------------------------------------------------------------------|
| Journal:                           | <i>BMJ Open</i>                                                                                                                                                                                                                                         |
| Manuscript ID:                     | bmjopen-2013-002898                                                                                                                                                                                                                                     |
| Article Type:                      | Research                                                                                                                                                                                                                                                |
| Date Submitted by the Author:      | 17-Mar-2013                                                                                                                                                                                                                                             |
| Complete List of Authors:          | Shorr, Andrew; Washington Hospital Center, Medicine<br>Zilberberg, Marya; EviMed,<br>Kan, Jason; Barnes Jewish Hospital,<br>Hoffman, Justin; Barnes Jewish Hospital,<br>Micek, Scott; Barnes Jewish Hospital,<br>Kollef, Marin; Barnes Jewish Hospital, |
| <b>Primary Subject<br>Heading</b>: | Infectious diseases                                                                                                                                                                                                                                     |
| Secondary Subject Heading:         | Intensive care                                                                                                                                                                                                                                          |
| Keywords:                          | Epidemiology < INFECTIOUS DISEASES, Adult intensive & critical care < INTENSIVE & CRITICAL CARE, Protocols & guidelines < HEALTH SERVICES ADMINISTRATION & MANAGEMENT                                                                                   |
|                                    |                                                                                                                                                                                                                                                         |

SCHOLARONE™  
Manuscripts

Peer review only

## Azithromycin and Survival In *Streptococcus pneumoniae* Pneumonia: A Retrospective Study

Andrew F. Shorr, MD, MPH,<sup>1</sup> Marya D. Zilberberg, MD, MPH,<sup>2</sup> Jason Kan, BS,<sup>3</sup> Justin Hoffman, BS,<sup>3</sup>  
Scott T. Micek, Pharm D,<sup>3</sup> and Marin H. Kollef, MD<sup>4</sup>

From the

- (1) Pulmonary and Critical Care Medicine Division, Washington Hospital Center, Washington, DC
- (2) EviMed Research Group, LLC, Goshen, MA & University of Massachusetts, Amherst, MA
- (3) Department of Pharmacy Barnes-Jewish Hospital, St. Louis, MO
- (4) Division of Pulmonary and Critical Care Medicine, Washington University School of Medicine, St. Louis, MO

Address all correspondence to:

Andrew F. Shorr, MD, MPH  
Pulmonary and Critical Care Medicine  
Washington Hospital Center  
110 Irving St., NW  
Washington, DC 20010  
Phone: 202-877-7856  
Fax: 202-291-0386  
Email: [afshorr@dnamail.com](mailto:afshorr@dnamail.com)

Word Count: 2480

Running head: Azithromycin and Pneumococcal Pneumonia

Key words: Azithromycin, pneumonia, *S. pneumoniae*, survival

This project was supported by the Barnes-Jewish Hospital Foundation to support data extraction but no extramural support was provided.

**ARTICLE SUMMARY****Article focus**

-To determine the impact of azithromycin co-therapy on outcomes in *Streptococcus pneumoniae* pneumonia

**Key messages**

-Azithromycin co-therapy in pneumonia due to *S. pneumoniae* is associated with improved short-term survival

-This finding is independent of multiple potential confounders including timeliness of antibiotic treatment

**Strengths and limitations of this study**

-Strengths: large sample of pure *S. pneumoniae* pneumonia

-Limitations: Data derive from a single center and the study's retrospective design

**ABSTRACT**

Objective: *S. pneumoniae* (SP) represents a major pathogen in pneumonia. The impact of azithromycin on mortality in SP pneumonia remains unclear. Recent safety concerns regarding azithromycin have raised alarm about this agent's role with pneumonia. We sought to clarify the relationship between survival and azithromycin use in SP pneumonia.

Design: Retrospective cohort.

Setting: Urban, academic hospital.

Participants: Adults with a diagnosis of SP pneumonia (Jan-Dec 2010). The diagnosis of pneumonia required a compatible clinical syndrome and radiographic evidence of an infiltrate.

Intervention: None

Primary and secondary outcome measures: Hospital mortality served as the primary endpoint, and we compared subjects given azithromycin to those not treated with this. Co-variables of interest included demographics, severity of illness, comorbidities, and infection related characteristics (eg, appropriateness of initial treatment, bacteremia). We employed logistic regression to assess the independent impact of azithromycin on hospital mortality.

Results: The cohort included 187 subjects (mean age:  $67.0 \pm 8.2$  years, 50.3% male, 5.9% admitted to the ICU). The most frequently utilized non-macrolide antibiotics included: ceftriaxone (n=111), cefipeme (n=31), and moxifloxacin (n=22). Approximately 2/3rds of the cohort received azithromycin. Crude mortality was lower in persons given azithromycin (5.6% vs. 23.6%,  $p < 0.01$ ). The final survival model included four variables: age, need for mechanical ventilation, initial appropriate therapy, and azithromycin use. The adjusted odds ratio for mortality associated with azithromycin equaled 0.26 (95% confidence interval: 0.08-0.80,  $p = 0.018$ ).

Conclusions: SP pneumonia generally remains associated with substantial mortality while azithromycin treatment is associated with significantly higher survival rates. The impact of azithromycin is independent of multiple potential confounders.

## INTRODUCTION

Pneumonia remains a leading cause of morbidity and mortality. Annually more than 1.3 million patients present to the hospital with pneumonia and require admission.[1] Direct costs related to pneumonia exceed several billion each year in the United States.<sup>1</sup> Because of this burden, multiple efforts have focused on improving the care of patient with pneumonia and attempted to address means for enhancing outcomes in this disease and hospitalists often care for and design hospital pathways for those admitted with pneumonia.

Concurrent with these quality efforts, the microbiology of pneumonia presenting to the hospital has evolved. Over the last decade, pathogens traditionally thought confined to the hospital, such as Methicillin-resistant *Staphylococcus aureus* (MRSA) and *Pseudomonas aeruginosa*, now are implicated in non-nosocomial pneumonia.[2,3] This epidemiologic trend led to the creation of the concept of healthcare-associated pneumonia (HCAP).[2,3] At the same time, rates of pneumonia in adults due to *Streptococcus pneumoniae* have diminished, in part due to the effects of herd immunity arising from the use of the newer vaccines in children.[4] Nonetheless, *S. pneumoniae* remains a leading pathogen in non-nosocomial pneumonia, whether it be CAP or HCAP and whether it results in mild disease or more severe illness necessitating admission to the intensive care unit (ICU).[5,6] Furthermore, current treatment guidelines for HCAP do not suggest consideration of adjunctive macrolide antibiotics, despite the fact that *S. pneumoniae* can still be seen in this syndrome.[3,5,7] Surveillance studies and epidemiologic reports presently indicate that *S. pneumoniae* often represents either the second or third most frequent pathogen recovered from subjects admitted with pneumonia via the ED.[5,6] Thus, despite it being less prevalent than in prior years, *S. pneumoniae* continues to lead to a disproportionate burden on the healthcare system.

Macrolide antibiotics, particularly azithromycin, are unique as anti-infective agents in that they appear to have potent anti-inflammatory properties.[8] Earlier analyses suggest that azithromycin exposure may confer a mortality advantage in CAP, irrespective of the causative pathogen.[9,10] This

1  
2  
3 observation has resulted in treatment guidelines recommending utilization of macrolides in CAP and their  
4 continuation even if the patient is concurrently being treated with another in vitro active antimicrobial as  
5 one potential approach.[11] Many of the reports supporting a survival benefit related to macrolide use in  
6 CAP, though, have been limited because they either were conducted in an era before HCAP became a  
7 concern or because they often did not account for issues related to rates of initially appropriate  
8 antimicrobial administration. These reports have also explored CAP as a syndrome, regardless of the  
9 pathogen, and not specifically addressed *S. pneumoniae*. Recent descriptions of potential cardiovascular  
10 toxicities arising with azithromycin reinforce the need to elucidate if this agent alters mortality.[12] A  
11 potential survival benefit related to azithromycin in *S. pneumoniae* pneumonia would indicate that the  
12 risk/benefit calculus favors utilization of this agent notwithstanding concerns about rhythm disturbances.  
13  
14  
15  
16  
17  
18  
19  
20  
21  
22  
23

24  
25 We hypothesized that co-treatment with azithromycin would improve mortality in pneumonia due  
26 to *S. pneumoniae* and that this effect would be independent of confounding arising from failure to  
27 administer appropriate initial antibiotic therapy. To explore our hypothesis, we conducted a retrospective  
28 analysis of all subjects with either CAP or HCAP admitted with evidence of infection related to *S.*  
29  
30  
31  
32  
33  
34  
35  
36  
37  
38  
39  
40  
41  
42  
43  
44  
45  
46  
47  
48  
49  
50  
51  
52  
53  
54  
55  
56  
57  
58  
59  
60

## METHODS

### Study Overview and Subjects

We retrospectively identified all adult (age > 18 years) patients admitted with a clinical diagnosis of pneumonia between January 1, 2010 and December 31, 2010. All patients were required to have initially presented to the ED. We defined pneumonia based on both signs and symptoms of infection (ie, elevated white blood cell count or > 10% band forms, fever or hypothermia). We further required compatible chest imaging documenting an infiltrate(s). One investigator (MHK), blinded to the clinical and microbiologic information adjudicated the chest imaging. Identification of *S. pneumoniae* was based on the results of cultures from either blood, pleural fluid, sputum, or the lower airways. A positive urinary antigen for *S. pneumoniae* also was used to document infection with this pathogen. The patients

1  
2  
3 described in this report have been previously included in an earlier analysis validating the concept of  
4  
5 HCAP.[3] The Washington University School of Medicine Human Studies Committee approved the  
6  
7 study (# 201205194). As this was a retrospective analysis, there was no requirement for informed  
8  
9 consent.  
10

### 14 **Endpoints and Co-variates**

16 Hospital mortality represented the primary endpoint. We compared persons with pneumococcal  
17  
18 pneumonia initially treated with azithromycin to those not given this agent. During the observation  
19  
20 period, this was the only macrolide available for treatment of pneumonia at the study hospital. There  
21  
22 were no subjects given clarithromycin. Co-variates of interest included patient demographics, severity of  
23  
24 illness, and infection related variables. For demographic factors we noted age, gender, and race. With  
25  
26 respect to co-morbidities, we recorded if the subject was residing in a nursing home or long-term care  
27  
28 facility, was recently hospitalized in the last 90 days, had received antimicrobials in the last 30 days,  
29  
30 suffered from end stage renal disease requiring hemodialysis, or was immunosuppressed. We defined  
31  
32 immunosuppression based on the presence of either acquired-immunodeficiency syndrome (AIDS), active  
33  
34 malignancy undergoing chemotherapy, or treatment with immunosuppressants (ie, 10 mg prednisone or  
35  
36 equivalent daily for at least 30 days or alternate agents such as methotrexate). To assess disease severity  
37  
38 we calculated the CURB-65 score along with recording if there was a need for either ICU care or  
39  
40 mechanical ventilation (MV).[13] With respect to infection-related variables we determined if bacteremia  
41  
42 complicated the pneumonia and the initial antibiotic regimen. We classified the initial antibiotic regimen  
43  
44 as appropriate if a non-macrolide antibiotic that was *in vitro* active against the *S. pneumoniae* isolate was  
45  
46 administered within 6 hours of presentation. At the host institution, antibiotic administration is  
47  
48 protocolized such that all subjects received a non-macrolide anti-infective with activity against  
49  
50 pneumococcus. Therefore, appropriateness of antibiotics was a reflection of the timeliness of  
51  
52 administration. Additionally, by convention, patients given combination treatment including  
53  
54 azithromycin received these drugs concurrently.  
55  
56  
57  
58  
59  
60

## Statistics

We completed univariate analyses with either the Fisher's exact test or Student's t-test as appropriate. Continuous, non-parametrically distributed data was compared via the Mann-Whitney U test. All analyses were two tailed, and a p value of < 0.05 was assumed to represent statistical significance. To determine independent factors associated with mortality, we employed logistic regression. Variables significant at P<0.10 level in univariate analyses were entered into model. To arrive at the most parsimonious model we utilized a step-wise backward elimination approach. Co-linearity was explored with correlation matrices. Adjusted odds ratios (AORs) and ninety-five percent confidence intervals (CIs) are reported where appropriate. The model's goodness-of-fit was assessed via calculation of the R<sup>2</sup> value and the Hosmer-Lemeshow c-statistic. All analyses were performed with SPSS 19.0 (SPSS, Chicago, IL).

## RESULTS

During the study period 977 persons were admitted via the ED with evidence of bacterial pneumonia. Of these patients, 187 were infected with *S. pneumoniae*. The mean age of these subjects was 57.0 +/- 8.2 years and approximately half were male. The crude hospital mortality in *S. pneumoniae* pneumonia equaled 11.2% while the mean hospital length of stay measured 8.2 +/- 5.0 days. The most commonly utilized non-azithromycin antibiotics were ceftriaxone (n=111), cefipeme (n= 31), and moxifloxacin (n=22).

Table 1 reveals the differences in baseline characteristics between subjects dying while hospitalized and those surviving to discharge. Those who died were older but there were no other differences in demographics. Patients dying were more severely ill based on all measures used to assess this. Specifically, survivors had lower CURB-65 scores as compared to decedents (median CURB-65 class 4 vs 2, p=0.025). More than a quarter of those dying received MV while fewer than 5% of those discharged alive required MV (p=0.001). The distribution of criteria defining HCAP did not differ



1  
2  
3 between groups. Approximately 11% of all patients resided in nursing homes prior to admission and the  
4 rate of admission from nursing homes did not correlate with hospital mortality. Immunosuppression was  
5 prevalent in the study population but this also did not differ between those dying and survivors.  
6  
7

8  
9 With respect to infection-related characteristics, the frequency of bacteremia was similar between  
10 the two groups. Compared to those who survived, however, those who died were more likely to have  
11 been given delayed antibiotic therapy (61.9% vs. 91.0%,  $p=0.001$ ). In all instances, inappropriate therapy  
12 occurred not because of the use of an *in vitro* inactive agent but because of a delay in the initiation of  
13 antibiotics.  
14  
15  
16  
17  
18  
19

20 Hospital mortality rates were significantly lower in persons treated with azithromycin. Of  
21 patients given the macrolide, only 5.6% expired in the hospital as opposed to 23.6% of persons not treated  
22 with such an agent (Figure 1). The odds ratio (OR) for death with a macrolide was 0.20 (94% CI: 0.08-  
23 0.52).  
24  
25  
26  
27  
28

29 In the logistic regression, four variables remained independently associated with mortality (Table  
30 2). Mortality increased with increasing age (AOR 1.05, 95% CI: 1.01-1.09,  $p=0.018$ ) and with the need  
31 for MV (AOR 8.82, 95% CI: 2.74-28.46,  $<0.001$ ). Timely antibiotic therapy resulted in lower in-hospital  
32 death rates (AOR, 0.13, 95% CI: 0.03-0.46,  $p=0.002$ ). Finally, treatment with azithromycin correlated  
33 with enhanced survival. Azithromycin exposure was independently associated with a reduced risk for  
34 death by nearly 75% (AOR 0.26, 95% CI: 0.08-0.90,  $p=0.018$ ). Neither being classified as HCAP nor  
35 any of the individual criteria defining HCAP stayed in the final model. The model had excellent fit with  
36 an  $R^2$  value of 0.42 and a C-statistic of 0.991.  
37  
38  
39  
40  
41  
42  
43  
44  
45  
46  
47

## 48 **DISCUSSION**

49  
50 This retrospective analysis of a cohort of patients with microbiologically confirmed  
51 pneumococcal pneumonia indicates that co-administration of azithromycin is associated with significant  
52 reductions in short-term mortality. This effect is independent of multiple potential confounders such as  
53  
54  
55  
56  
57  
58  
59  
60

1  
2  
3 severity of illness and the timeliness and activity of initial antimicrobial therapy. The positive impact of  
4  
5 azithromycin was also independent of whether bacteremia was present.  
6  
7

8         Prior efforts evaluating the significance of macrolide therapy on outcomes in CAP have reached  
9  
10 conflicting conclusions. Some large case series indicate a survival benefit in persons given macrolides  
11  
12 while others have failed to detect such an impact. For example, Martin-Loeches and colleagues observed  
13  
14 that macrolide use reduced the risk for mortality in intubated patients with CAP.[9] Tessemer et al. in a  
15  
16 large observational German trial also noted that macrolide exposure improved cure rates and short-term  
17  
18 mortality.[10] In pneumococcal bacteremia complicating pneumonia, Metersky conclude that macrolide  
19  
20 use improved 30 day readmission and mortality rates [14]. On the other hand, Asadi and co-workers  
21  
22 reported that mortality rates were similar among 3000 patients treated with either monotherapy with a  
23  
24 fluoroquinolone as opposed to a beta-lactam /macrolide combination.[15] Wilson et al additionally  
25  
26 determined that inclusion of a macrolide in the antibiotic regimen failed to enhance survival in elderly  
27  
28 patients with CAP.[16] Meta-analyses are similarly conflicting in their assessments. One recent meta-  
29  
30 analysis including 16 randomized controlled trials (RCTs) evaluating fluoroquinolones against beta-  
31  
32 lactam/macrolide combinations calculated that there was no difference in mortality between these  
33  
34 regimens.[17] Another group of investigators, though, included both observational reports and RCTs and  
35  
36 determined that macrolide administration offered a small but statistically significant mortality benefit.[18]  
37  
38  
39

40         Our findings add to this debate and are novel in several respects. First, one potential limitation of  
41  
42 the above-mentioned studies is that they tend to pool all subjects with CAP, irrespective of culture  
43  
44 findings. In contrast, we restricted our evaluation to patients with confirmed *S. pneumoniae* infection  
45  
46 whether they had CAP or risk factors for HCAP. Including subjects with either syndrome serves to  
47  
48 underscore the need to focus on the pathogen rather than the infectious syndrome. Treatment guidelines  
49  
50 currently stratify persons in to two cohorts based on their risk factors for infection with resistant  
51  
52 pathogens.[7,11] This scheme ignores the point that pneumococcal infection occurs in both CAP and  
53  
54 HCAP. Our results suggest that revision of the guidelines may be appropriate as we noted a mortality  
55  
56 benefit with azithromycin even after controlling for factors and co-morbidities which define HCAP.  
57  
58  
59  
60

1  
2  
3  
4  
5  
6  
7  
8  
9  
10  
11  
12  
13  
14  
15  
16  
17  
18  
19  
20  
21  
22  
23  
24  
25  
26  
27  
28  
29  
30  
31  
32  
33  
34  
35  
36  
37  
38  
39  
40  
41  
42  
43  
44  
45  
46  
47  
48  
49  
50  
51  
52  
53  
54  
55  
56  
57  
58  
59  
60

Furthermore, some of the subjects in earlier reports failed to have either evidence of bacterial infection or were infected with a pathogen other than *S. pneumoniae*. In some instances, only administrative coding data rather than actual culture results facilitated subject identification. This distinction is important in that the immunomodulatory effects of azithromycin have been most clearly elucidated as it relates to infection with *S. pneumoniae*. Although broadly anti-inflammatory in a number of ways, the strongest biologic evidence of a potential means for an impact in pulmonary infection relates to investigations in *S. pneumoniae*. More importantly these effects of macrolides alter both cellular and humoral immunity. *In vitro*, azithromycin, for instance, prevents apoptosis of human polymorphonuclear lymphocytes and may reduce interleukin (IL)-8 production.[19,20] Exposure to azithromycin, furthermore, reduces pneumolysin from both macrolide-susceptible and resistant strains of *S. pneumoniae*. [21] Azithromycin may also reduce production of tumor necrosis alpha and IL-1 alpha in human monocytes and down regulate natural killer cell production with an ensuing alteration in various cytokines.[22] Therefore, by focusing on a specific organism where the nexus with the theoretical mechanisms of immune modulation are better established, our observations help to clarify the discordant findings of others. Our results, in turn, suggest that the benefit of macrolide co-treatment may be restricted to persons with pneumococcal infection

We also specifically controlled for the timeliness of initial therapy. Initially appropriate and timely antibiotic treatment is a key determinant of survival in a number of severe infections ranging from bacteremia to septic shock.[23,24] Many prior studies did not address modification effect related to the prescribing of initial antimicrobial therapy. In most RCTs, adjudicating the coverage and timeliness of initial therapy is clouded by the time window allowed to enroll patients in the specific clinical trial. Some observational reports have failed to explore the importance of this issue in their analytic approaches. Others have simply determined whether an antibiotic regimen was concordant with formal treatment guidelines was given. This constitutes only a surrogate means for evaluating the true appropriateness of antimicrobial treatment as it does not examine specific *in vitro* susceptibilities or the timing of the

1  
2  
3 antibiotic administration. We, however, specifically sought to rectify and address this limitation by  
4  
5 applying specific and clear criteria.  
6

7  
8 Our overall patient outcomes suggest that our data are broadly generalizable. The crude hospital  
9  
10 mortality rate was approximately 10%, as was the prevalence of bacteremia, reflecting what has been  
11  
12 noted in multiple epidemiologic analyses.[1] Likewise, the average LOS in our cohort parallels the  
13  
14 general LOS for this syndrome described in large analyses of US hospital discharge data. The goodness  
15  
16 of fit of our final mortality prediction model was also excellent indicating that there is at most moderate  
17  
18 unmeasured residual confounding. Many earlier analyses of case series data have not described either if  
19  
20 or how well their modeling of outcomes fits their observations.  
21

22  
23 Ray and co-workers have sparked concern regarding macrolides and reported potential  
24  
25 cardiovascular toxicity associated with azithromycin.[13] In a review of Medicaid claims data from  
26  
27 Tennessee, these authors state that deaths due to cardiovascular causes were higher in subjects given  
28  
29 azithromycin as compared to either no antibiotic or amoxicillin. This study has led to calls to re-evaluate  
30  
31 our utilization of azithromycin.[25] The potential for a mortality benefit accruing with use of this drug in  
32  
33 pneumococcal pneumonia should give pause to efforts to reflexively and broadly restrict access to  
34  
35 azithromycin. The burden and prevalence of pneumococcal pneumonia suggest that it would be  
36  
37 inappropriate for policy makers to mix all types of *S. pneumoniae* infection into one group as they make  
38  
39 decisions regarding the availability of this agent. Our results suggest that a measured risk-benefit analysis  
40  
41 is still required at the individual patient level.  
42  
43

44  
45 The present study has several significant limitations. First, its retrospective nature exposes it to  
46  
47 several forms of bias. However, there is little potential for ascertainment bias in our primary endpoint of  
48  
49 mortality. Second, the data represent the experience from a single center and thus may not be indicative  
50  
51 of the experience of others. Likewise we only studied inpatients and so our results do not apply to  
52  
53 patients not requiring admission. Third, given the constraints of modern microbiology and culture  
54  
55 techniques there are certainly cases of pneumococcal pneumonia we missed. Fourth, only 5% of the  
56  
57 population required ICU admission. As such, our results most reflect the experience of less severely ill  
58  
59  
60

*Azithromycin and Pneumococcal Pneumonia*

1  
2  
3 subjects and the significance of azithromycin in critically ill persons may be different. These, though, are  
4 the patients most often cared for by hospitalists. Finally, the sample size precluded us from examining  
5 several important variables such as the exact timing of anti-infective administration (eg, by hour delay  
6 from presentation). Sample size also likely explains why some variables were not significant in our final  
7 model. That the CURB-65 score failed to represent a correlate of mortality probably arose because other  
8 factors associated with survival (eg, need for MV) proved more strongly linked with mortality. With a  
9 larger cohort, CURB-65 may have remained in our final model.

10  
11  
12 In conclusion, co-administration of azithromycin appears to reduce mortality in persons admitted  
13 to the hospital with pneumoniae due to *S. pneumoniae*. This affect persists after adjusting for other  
14 important variables known to correlate with survival in this syndrome. Given the safety issues that have  
15 arisen with azithromycin along with the possible positive impact of this drug on hospital mortality, a  
16 randomized trial exploring the role for adjunctive azithromycin relative to placebo in CAP appears not  
17 only warranted but urgently needed.

**ACKNOWLEDGEMENTS, COMPETING INTERESTS, FUNDING**

Dr. Shorr had full access to the data and takes responsibility for the content of the paper including all analyses.

**Author contributions**

Study concept and design: AFS, MDZ, JH, JK, STM, MHK

Acquisition of data: JH, JK, STM

Analysis and interpretation of data: AFS, MDZ, STM, MHK

Drafting the manuscript: AFS, MDZ, MHK

Critical revision of the manuscript for important intellectual content: AFS, MDZ, JH, JK, STM, MHK

Statistical expertise: AFS, MDZ

Obtained funding: MHK

Study supervision: AFS, MHK

**Disclosures:** Dr. Shorr has served as a consultant to, speaker for, or received grant support from:

Astellas, Bayer, Cubist, Forrest, Pfizer, Theravance, and Trius. Dr. Zilberberg has served as a consultant to or received grant support from: Astellas, Forrest, J and J, and Pfizer. Dr. Kollef has served as a consultant, speaker for, or received grant support from: Cubist, Hospria, Merck, and Sage Dr. Micek has received grant support from Cubist, Optimer, Merck, and Pfizer. The remaining authors have no potential conflicts.

**Funding:** This project was supported by the Barnes-Jewish Hospital Foundation.

**Data sharing:** There are no additional unpublished data available from this study.

**REFERENCES**

1  
2  
3  
4  
5  
6  
7  
8  
9  
10  
11  
12  
13  
14  
15  
16  
17  
18  
19  
20  
21  
22  
23  
24  
25  
26  
27  
28  
29  
30  
31  
32  
33  
34  
35  
36  
37  
38  
39  
40  
41  
42  
43  
44  
45  
46  
47  
48  
49  
50  
51  
52  
53  
54  
55  
56  
57  
58  
59  
60

1: Niederman M. In the clinic. Community-acquired pneumonia. *Ann Intern Med* 2009;**151**:ITC4-2-ITC4-14.

2: Zilberberg MD, Shorr AF. Healthcare-associated pneumonia: the state of evidence to date. *Curr Opin Pulm Med* 2011;**17**:142-7.

3: Shorr AF, Zilberberg MD, Reichley R, Kan J, Hoban A, et al. Validation of a clinical score for assessing the risk of resistant pathogens in patients with pneumonia presenting to the emergency department. *Clin Infect Dis* 2012;**54**:193-8.

4: Lexau CA, Lynfield R, Danila R, Pilishvili T, Facklam R, et al. Changing epidemiology of invasive pneumococcal disease among older adults in the era of pediatric pneumococcal conjugate vaccine. *JAMA*. 2005;**294**:2043-51.

5: Kollef MH, Shorr A, Tabak YP, et al. Epidemiology and outcomes of health-care-associated pneumonia: results from a large US database of culture-positive pneumonia. *Chest* 2005;**128**:3854-62.

6: Schreiber MP, Chan CM, Shorr AF. Resistant pathogens in nonnosocomial pneumonia and respiratory failure: is it time to refine the definition of health-care-associated pneumonia? *Chest* 2010;**137**:1283-8.

7: American Thoracic Society; Infectious Diseases Society of America. Guidelines for the management of adults with hospital-acquired, ventilator-associated, and healthcare-associated pneumonia. *Am J Respir Crit Care Med* 2005;**17**:388-416.

- 1  
2  
3  
4  
5  
6  
7  
8  
9  
10  
11  
12  
13  
14  
15  
16  
17  
18  
19  
20  
21  
22  
23  
24  
25  
26  
27  
28  
29  
30  
31  
32  
33  
34  
35  
36  
37  
38  
39  
40  
41  
42  
43  
44  
45  
46  
47  
48  
49  
50  
51  
52  
53  
54  
55  
56  
57  
58  
59  
60
- 8: Kovaleva A, Remmelts HH, Rijkers GT, Hoepelman AI, Biesma DH, et al. Immunomodulatory effects of macrolides during community-acquired pneumonia: a literature review. *J Antimicrob Chemother.* 2012;**67**:530-40.
- 9: Martin-Loeches I, Lisboa T, Rodriguez A, Putensen C, Annane D, et al. Combination antibiotic therapy with macrolides improves survival in intubated patients with community-acquired pneumonia. *Intensive Care Med* 2010;**36**:612-20.
- 10: Tessmer A, Welte T, Martus P, Schnoor M, Marre R et al. Impact of intravenous {beta}-lactam/macrolide versus {beta}-lactam monotherapy on mortality in hospitalized patients with community-acquired pneumonia. *J Antimicrob Chemother* 2009;**63**:1025-33.
- 11: Mandell LA, Wunderink RG, Anzueto A, Bartlett JG, Campbell GD, et al. Infectious Diseases Society of America/American Thoracic Society consensus guidelines on the management of community-acquired pneumonia in adults. *Clin Infect Dis* 2007;**44** Suppl 2:S27-72.
- 12: Ray WA, Murray KT, Hall K, Arbogast PG, Stein CM. Azithromycin and the risk of cardiovascular death. *N Engl J Med* 2012;**366**:1881-90.
- 13: Lim WS, van der Eerden MM, Laing R, Boersma WG, Karalus N, et al. Defining community acquired pneumonia severity on presentation to hospital: an international derivation and validation study. *Thorax.* 2003;**58**:377-82.
- 14: Metersky ML, Ma A, Houck PM, et al. Antibiotics for bacteremic pneumonia: Improved outcomes with macrolides but not fluoroquinolones. *Chest* 2007;**131**:466-73.



1  
2  
3  
4  
5  
6  
7  
8  
9  
10  
11  
12  
13  
14  
15  
16  
17  
18  
19  
20  
21  
22  
23  
24  
25  
26  
27  
28  
29  
30  
31  
32  
33  
34  
35  
36  
37  
38  
39  
40  
41  
42  
43  
44  
45  
46  
47  
48  
49  
50  
51  
52  
53  
54  
55  
56  
57  
58  
59  
60

15: Asadi L, Eurich DT, Gamble JM, Minhas-Sandhu JK, Marrie TJ, et al. Impact of guideline-concordant antibiotics and macrolide/ $\beta$ -lactam combinations in 3203 patients hospitalized with pneumonia: prospective cohort study. *Clin Microbiol Infect* 2012 Jan 30. doi: 10.1111/j.1469-0691.2012.03783.x. [Epub ahead of print] PubMed PMID: 22404691.

16: Wilson BZ, Anzueto A, Restrepo MI, Pugh MJ, Mortensen EM. Comparison of two guideline-concordant antimicrobial combinations in elderly patients hospitalized with severe community acquired pneumonia. *Crit Care Med* 2012 May 22. [Epub ahead of print] PubMed PMID: 22622401.

17: Skalsky K, Yahav D, Lador A, Eliakim-Raz N, Leibovici L, et al. Macrolides vs. quinolones for community-acquired pneumonia: meta-analysis of randomized controlled trials. *Clin Microbiol Infect* 2012 Mar 24. doi: 10.1111/j.1469-0691.2012.03838.x. [Epub ahead of print] PubMed PMID: 22489673.

18: Asadi L, Sligl WI, Eurich DT, Colmers IN, Tjosvold L, et al. Macrolide-Based Regimens and Mortality in Hospitalized Patients With Community-Acquired Pneumonia: A Systematic Review and Meta-analysis. *Clin Infect Dis* 2012 May 31. [Epub ahead of print] PubMed PMID: 22511553.

19: Koch CC, Esteban DJ, Chin AC, Olson ME, Read RR, et al. Apoptosis, oxidative metabolism and interleukin-8 production in human neutrophils exposed to azithromycin: effects of *Streptococcus pneumoniae*. *J Antimicrob Chemother* 2000;**46**:19-26.

20: Verleden GM, Vanaudenaerde BM, Dupont LJ, Van Raemdonck DE. Azithromycin reduces airway neutrophilia and interleukin-8 in patients with bronchiolitis obliterans syndrome. *Am J Respir Crit Care Med* 2006; **174**:566-570.

1  
2  
3 21: Anderson R, Steel HC, Cockeran R, von Gottberg A, de Gouveia L, et al. Comparison of the effects  
4 of macrolides, amoxicillin, ceftriaxone, doxycycline, tobramycin and fluoroquinolones, on the production  
5 of pneumolysin by *Streptococcus pneumoniae* in vitro. *J Antimicrob Chemother* 2007;**60**:1155-8.  
6  
7  
8

9  
10  
11 22: Lin SJ, Yan DC, Lee WI, Kuo ML, Hsiao HS, et al. Effect of azithromycin on natural killer cell  
12 function. *Int Immunopharmacol* 2012;**13**:8-14.  
13  
14

15  
16  
17 23: Kumar A, Ellis P, Arabi Y, Roberts D, Light B, et al. Initiation of inappropriate antimicrobial therapy  
18 results in a fivefold reduction of survival in human septic shock. *Chest* 2009;**136**:1237-48.  
19  
20  
21

22  
23  
24 24: Micek ST, Lloyd AE, Ritchie DJ, Reichley RM, Fraser VJ, et al. *Pseudomonas aeruginosa*  
25 bloodstream infection: importance of appropriate initial antimicrobial treatment. *Antimicrob Agents*  
26 *Chemother.* 2005;**49**:1306-11.  
27  
28  
29

30  
31  
32 25: FDA Statement regarding azithromycin (Zithromax) and the risk of cardiovascular death. Available  
33 at <http://www.fda.gov/Drugs/Drugsafety/ucm304372.htm> accessed 12 Jul 2012.  
34  
35  
36  
37  
38  
39  
40  
41  
42  
43  
44  
45  
46  
47  
48  
49  
50  
51  
52  
53  
54  
55  
56  
57  
58  
59  
60

Baseline CharacteristicsTable 1.

|                                               | Hospital Death (n=21) | Hospital Survival<br>(n=166) | p     |
|-----------------------------------------------|-----------------------|------------------------------|-------|
| <i>Demographics</i>                           |                       |                              |       |
| -Age, mean±SD, years                          | 66.8±18.23            | 55.7±15.0                    | 0.002 |
| -Male, %                                      | 47.6%                 | 50.6%                        | 0.821 |
| <i>-Race</i>                                  |                       |                              |       |
| Caucasian, %                                  | 47.6%                 | 52.4%                        | 0.767 |
| African-American,%                            | 52.4%                 | 46.5%                        |       |
| Other,%                                       | 0. %                  | 1.2%                         |       |
| <i>Severity of Illness</i>                    |                       |                              |       |
| -CURB 65 Score, median                        | 4                     | 2                            | 0.025 |
| -ICU Admission, %                             | 22.9%                 | 3.4%                         | 0.001 |
| -Mechanical Ventilation,%                     | 27.8%                 | 4.5%                         | 0.001 |
| <i>Comorbidities</i>                          |                       |                              |       |
| -LTC admission, %                             | 11.1%                 | 11.2%                        | 0.999 |
| -HD, %                                        | 0%                    | 2.4%                         | 0.999 |
| -Immunosuppression, %                         | 33.3%                 | 22.9%                        | 0.289 |
| -Prior antibiotics, %                         | 33.3%                 | 24.1%                        | 0.423 |
| -Recent hospitalization, %                    | 14.1%                 | 8.8%                         | 0.353 |
| <i>Infection-related Characteristics</i>      |                       |                              |       |
| -Bacteremia, %                                | 13.7%                 | 8.2%                         | 0.256 |
| - <u>Delay in</u> appropriate antibiotics, %* | 61.9%                 | 91.0%                        | 0.001 |

Variables Associated with Hospital MortalityTable 2

|                      | Adjusted Odds Ratio | 95% Confidence Interval | p     |
|----------------------|---------------------|-------------------------|-------|
| -Age, per year       | 1.05                | 1.01-1.09               | 0.018 |
| -Need for MV         | 8.82                | 2.74-28.46              | 0.001 |
| -Appropriate therapy | 0.13                | 0.03-0.47               | 0.002 |
| -Use of Azithromycin | 0.26                | 0.08-0.80               | 0.018 |

Hospital Mortality and Azithromycin Treatment  
Figure 1.

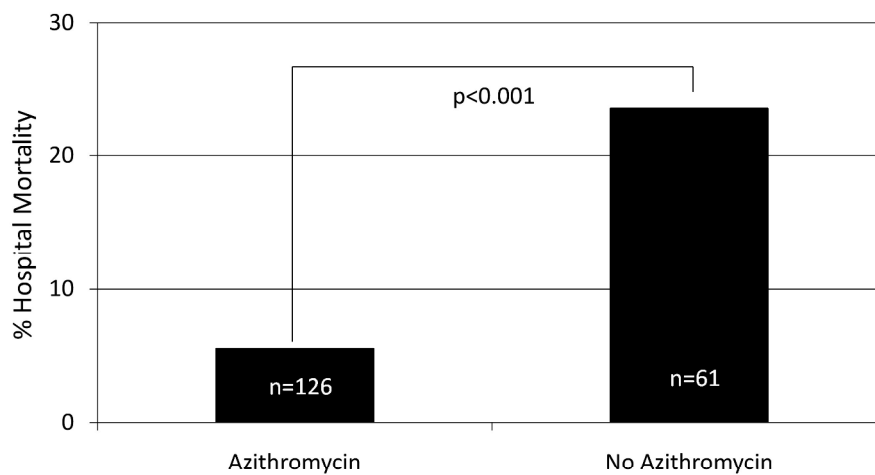

Odds Ratio for Death with Azithromycin: 0.20 (94% CI: 0.08-0.52)

1058x793mm (72 x 72 DPI)

Review only

**STROBE 2007 (v4) checklist of items to be included in reports of observational studies in epidemiology\***  
**Checklist for cohort, case-control, and cross-sectional studies (combined)**

| Section/Topic             | Item # | Recommendation                                                                                                                                                                                                                                                                                                                                                                                                                                                         | Reported on page # |
|---------------------------|--------|------------------------------------------------------------------------------------------------------------------------------------------------------------------------------------------------------------------------------------------------------------------------------------------------------------------------------------------------------------------------------------------------------------------------------------------------------------------------|--------------------|
| Title and abstract        | 1      | (a) Indicate the study's design with a commonly used term in the title or the abstract                                                                                                                                                                                                                                                                                                                                                                                 | 1                  |
|                           |        | (b) Provide in the abstract an informative and balanced summary of what was done and what was found                                                                                                                                                                                                                                                                                                                                                                    | 3                  |
| <b>Introduction</b>       |        |                                                                                                                                                                                                                                                                                                                                                                                                                                                                        |                    |
| Background/rationale      | 2      | Explain the scientific background and rationale for the investigation being reported                                                                                                                                                                                                                                                                                                                                                                                   | 4                  |
| Objectives                | 3      | State specific objectives, including any pre-specified hypotheses                                                                                                                                                                                                                                                                                                                                                                                                      | 4-5                |
| <b>Methods</b>            |        |                                                                                                                                                                                                                                                                                                                                                                                                                                                                        |                    |
| Study design              | 4      | Present key elements of study design early in the paper                                                                                                                                                                                                                                                                                                                                                                                                                | 5                  |
| Setting                   | 5      | Describe the setting, locations, and relevant dates, including periods of recruitment, exposure, follow-up, and data collection                                                                                                                                                                                                                                                                                                                                        | 5                  |
| Participants              | 6      | (a) <i>Cohort study</i> —Give the eligibility criteria, and the sources and methods of selection of participants. Describe methods of follow-up<br><i>Case-control study</i> —Give the eligibility criteria, and the sources and methods of case ascertainment and control selection. Give the rationale for the choice of cases and controls<br><i>Cross-sectional study</i> —Give the eligibility criteria, and the sources and methods of selection of participants | 5                  |
|                           |        | (b) <i>Cohort study</i> —For matched studies, give matching criteria and number of exposed and unexposed<br><i>Case-control study</i> —For matched studies, give matching criteria and the number of controls per case                                                                                                                                                                                                                                                 |                    |
| Variables                 | 7      | Clearly define all outcomes, exposures, predictors, potential confounders, and effect modifiers. Give diagnostic criteria, if applicable                                                                                                                                                                                                                                                                                                                               | 5-6                |
| Data sources/ measurement | 8*     | For each variable of interest, give sources of data and details of methods of assessment (measurement). Describe comparability of assessment methods if there is more than one group                                                                                                                                                                                                                                                                                   | 5-6                |
| Bias                      | 9      | Describe any efforts to address potential sources of bias                                                                                                                                                                                                                                                                                                                                                                                                              | 6                  |
| Study size                | 10     | Explain how the study size was arrived at                                                                                                                                                                                                                                                                                                                                                                                                                              | 5                  |
| Quantitative variables    | 11     | Explain how quantitative variables were handled in the analyses. If applicable, describe which groupings were chosen and why                                                                                                                                                                                                                                                                                                                                           | 7                  |
| Statistical methods       | 12     | (a) Describe all statistical methods, including those used to control for confounding                                                                                                                                                                                                                                                                                                                                                                                  | 7                  |
|                           |        | (b) Describe any methods used to examine subgroups and interactions                                                                                                                                                                                                                                                                                                                                                                                                    | NA                 |
|                           |        | (c) Explain how missing data were addressed                                                                                                                                                                                                                                                                                                                                                                                                                            | NA                 |
|                           |        | (d) <i>Cohort study</i> —If applicable, explain how loss to follow-up was addressed<br><i>Case-control study</i> —If applicable, explain how matching of cases and controls was addressed                                                                                                                                                                                                                                                                              | NA                 |

|                          |     |                                                                                                                                                                                                              |          |
|--------------------------|-----|--------------------------------------------------------------------------------------------------------------------------------------------------------------------------------------------------------------|----------|
|                          |     | <i>Cross-sectional study</i> —If applicable, describe analytical methods taking account of sampling strategy                                                                                                 |          |
|                          |     | (e) Describe any sensitivity analyses                                                                                                                                                                        | NA       |
| <b>Results</b>           |     |                                                                                                                                                                                                              |          |
| Participants             | 13* | (a) Report numbers of individuals at each stage of study—eg numbers potentially eligible, examined for eligibility, confirmed eligible, included in the study, completing follow-up, and analysed            | 7        |
|                          |     | (b) Give reasons for non-participation at each stage                                                                                                                                                         | NA       |
|                          |     | (c) Consider use of a flow diagram                                                                                                                                                                           | NA       |
| Descriptive data         | 14* | (a) Give characteristics of study participants (eg demographic, clinical, social) and information on exposures and potential confounders                                                                     | 7, Table |
|                          |     | (b) Indicate number of participants with missing data for each variable of interest                                                                                                                          | NA       |
|                          |     | (c) <i>Cohort study</i> —Summarise follow-up time (eg, average and total amount)                                                                                                                             | NA       |
| Outcome data             | 15* | <i>Cohort study</i> —Report numbers of outcome events or summary measures over time                                                                                                                          | 7-8      |
|                          |     | <i>Case-control study</i> —Report numbers in each exposure category, or summary measures of exposure                                                                                                         |          |
|                          |     | <i>Cross-sectional study</i> —Report numbers of outcome events or summary measures                                                                                                                           |          |
| Main results             | 16  | (a) Give unadjusted estimates and, if applicable, confounder-adjusted estimates and their precision (eg, 95% confidence interval). Make clear which confounders were adjusted for and why they were included | 8-9      |
|                          |     | (b) Report category boundaries when continuous variables were categorized                                                                                                                                    | 8-9      |
|                          |     | (c) If relevant, consider translating estimates of relative risk into absolute risk for a meaningful time period                                                                                             | NA       |
| Other analyses           | 17  | Report other analyses done—eg analyses of subgroups and interactions, and sensitivity analyses                                                                                                               | NA       |
| <b>Discussion</b>        |     |                                                                                                                                                                                                              |          |
| Key results              | 18  | Summarise key results with reference to study objectives                                                                                                                                                     | 9        |
| Limitations              | 19  | Discuss limitations of the study, taking into account sources of potential bias or imprecision. Discuss both direction and magnitude of any potential bias                                                   | 11       |
| Interpretation           | 20  | Give a cautious overall interpretation of results considering objectives, limitations, multiplicity of analyses, results from similar studies, and other relevant evidence                                   | 10-11    |
| Generalisability         | 21  | Discuss the generalisability (external validity) of the study results                                                                                                                                        | 11       |
| <b>Other information</b> |     |                                                                                                                                                                                                              |          |
| Funding                  | 22  | Give the source of funding and the role of the funders for the present study and, if applicable, for the original study on which the present article is based                                                | 13       |

\*Give information separately for cases and controls in case-control studies and, if applicable, for exposed and unexposed groups in cohort and cross-sectional studies.

**Note:** An Explanation and Elaboration article discusses each checklist item and gives methodological background and published examples of transparent reporting. The STROBE checklist is best used in conjunction with this article (freely available on the Web sites of PLoS Medicine at <http://www.plosmedicine.org/>, Annals of Internal Medicine at <http://www.annals.org/>, and Epidemiology at <http://www.epidem.com/>). Information on the STROBE Initiative is available at [www.strobe-statement.org](http://www.strobe-statement.org).

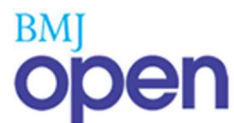

## Azithromycin and Survival In *Streptococcus pneumoniae* Pneumonia: A Retrospective Study

|                                    |                                                                                                                                                                                                                                                         |
|------------------------------------|---------------------------------------------------------------------------------------------------------------------------------------------------------------------------------------------------------------------------------------------------------|
| Journal:                           | <i>BMJ Open</i>                                                                                                                                                                                                                                         |
| Manuscript ID:                     | bmjopen-2013-002898.R1                                                                                                                                                                                                                                  |
| Article Type:                      | Research                                                                                                                                                                                                                                                |
| Date Submitted by the Author:      | 26-Apr-2013                                                                                                                                                                                                                                             |
| Complete List of Authors:          | Shorr, Andrew; Washington Hospital Center, Medicine<br>Zilberberg, Marya; EviMed,<br>Kan, Jason; Barnes Jewish Hospital,<br>Hoffman, Justin; Barnes Jewish Hospital,<br>Micek, Scott; Barnes Jewish Hospital,<br>Kollef, Marin; Barnes Jewish Hospital, |
| <b>Primary Subject<br>Heading</b>: | Infectious diseases                                                                                                                                                                                                                                     |
| Secondary Subject Heading:         | Intensive care                                                                                                                                                                                                                                          |
| Keywords:                          | Epidemiology < INFECTIOUS DISEASES, Adult intensive & critical care < INTENSIVE & CRITICAL CARE, Protocols & guidelines < HEALTH SERVICES ADMINISTRATION & MANAGEMENT                                                                                   |
|                                    |                                                                                                                                                                                                                                                         |

SCHOLARONE™  
Manuscripts



## Azithromycin and Survival In *Streptococcus pneumoniae* Pneumonia: A Retrospective Study

Andrew F. Shorr, MD, MPH,<sup>1</sup> Marya D. Zilberberg, MD, MPH,<sup>2</sup> Jason Kan, BS,<sup>3</sup> Justin Hoffman, BS,<sup>3</sup>  
Scott T. Micek, Pharm D,<sup>3</sup> and Marin H. Kollef, MD<sup>4</sup>

From the

- (1) Pulmonary and Critical Care Medicine Division, Washington Hospital Center, Washington, DC
- (2) EviMed Research Group, LLC, Goshen, MA & University of Massachusetts, Amherst, MA
- (3) Department of Pharmacy Barnes-Jewish Hospital, St. Louis, MO
- (4) Division of Pulmonary and Critical Care Medicine, Washington University School of Medicine, St. Louis, MO

Address all correspondence to:

Andrew F. Shorr, MD, MPH  
Pulmonary and Critical Care Medicine  
Washington Hospital Center  
110 Irving St., NW  
Washington, DC 20010  
Phone: 202-877-7856  
Fax: 202-291-0386  
Email: [afshorr@dnamail.com](mailto:afshorr@dnamail.com)

Word Count: 2848

Running head: Azithromycin and Pneumococcal Pneumonia

Key words: Azithromycin, pneumonia, *S. pneumoniae*, survival

This project was supported by the Barnes-Jewish Hospital Foundation to support data extraction but no extramural support was provided.

**ARTICLE SUMMARY****Article focus**

-To determine the impact of azithromycin co-therapy on outcomes in *Streptococcus pneumoniae* pneumonia

**Key messages**

-Azithromycin co-therapy in pneumonia due to *S. pneumoniae* is associated with improved short-term survival

-This finding is independent of multiple potential confounders including timeliness of antibiotic treatment

**Strengths and limitations of this study**

-Strengths: large sample of pure *S. pneumoniae* pneumonia

-Limitations: Data derive from a single center and the study's retrospective design

**ABSTRACT**

Objective: *S. pneumoniae* (SP) represents a major pathogen in pneumonia. The impact of azithromycin on mortality in SP pneumonia remains unclear. Recent safety concerns regarding azithromycin have raised alarm about this agent's role with pneumonia. We sought to clarify the relationship between survival and azithromycin use in SP pneumonia.

Design: Retrospective cohort.

Setting: Urban, academic hospital.

Participants: Adults with a diagnosis of SP pneumonia (Jan-Dec 2010). The diagnosis of pneumonia required a compatible clinical syndrome and radiographic evidence of an infiltrate.

Intervention: None

Primary and secondary outcome measures: Hospital mortality served as the primary endpoint, and we compared subjects given azithromycin to those not treated with this. Co-variables of interest included demographics, severity of illness, comorbidities, and infection related characteristics (eg, appropriateness of initial treatment, bacteremia). We employed logistic regression to assess the independent impact of azithromycin on hospital mortality.

Results: The cohort included 187 subjects (mean age:  $67.0 \pm 8.2$  years, 50.3% male, 5.9% admitted to the ICU). The most frequently utilized non-macrolide antibiotics included: ceftriaxone (n=111), cefipeme (n=31), and moxifloxacin (n=22). Approximately 2/3rds of the cohort received azithromycin. Crude mortality was lower in persons given azithromycin (5.6% vs. 23.6%,  $p<0.01$ ). The final survival model included four variables: age, need for mechanical ventilation, initial appropriate therapy, and azithromycin use. The adjusted odds ratio for mortality associated with azithromycin equaled 0.26 (95% confidence interval: 0.08-0.80,  $p=0.018$ ).

Conclusions: SP pneumonia generally remains associated with substantial mortality while azithromycin treatment is associated with significantly higher survival rates. The impact of azithromycin is independent of multiple potential confounders.

## INTRODUCTION

Pneumonia remains a leading cause of morbidity and mortality. Annually more than 1.3 million patients in the United States (US) present to the hospital with pneumonia and require admission.[1] Direct costs related to pneumonia exceed several billion each year in the US.[1] Because of this burden, multiple efforts have focused on improving the care of patient with pneumonia and attempted to address means for enhancing outcomes in this disease and hospitalists often care for and design hospital pathways for those admitted with pneumonia.

Concurrent with these quality efforts, the microbiology of pneumonia presenting to the hospital has evolved. Over the last decade, pathogens traditionally thought confined to the hospital, such as Methicillin-resistant *Staphylococcus aureus* (MRSA) and *Pseudomonas aeruginosa*, now are implicated in non-nosocomial pneumonia.[2,3] This epidemiologic trend led to the creation of the concept of healthcare-associated pneumonia (HCAP).[2,3] At the same time, rates of pneumonia in adults due to *Streptococcus pneumoniae* have diminished, in part due to the effects of herd immunity arising from the use of the newer vaccines in children.[4] Nonetheless, *S. pneumoniae* remains a leading pathogen in non-nosocomial pneumonia, whether it be CAP or HCAP and whether it results in mild disease or more severe illness necessitating admission to the intensive care unit (ICU).[5,6] Furthermore, current treatment guidelines for HCAP do not suggest consideration of adjunctive macrolide antibiotics, despite the fact that *S. pneumoniae* can still be seen in this syndrome.[3,5,7] While some surveillance studies indicate that *S. pneumoniae* remains the most prevalent pathogen in patients admitted with pneumonia via the ED, other studies suggest that *S. pneumoniae* often represents either the second or third most frequent pathogen in this setting.[5,6,8] Thus, despite it potentially being less prevalent than in prior years, *S. pneumoniae* continues to lead to a disproportionate burden on the healthcare system.

Macrolide antibiotics, particularly azithromycin, are unique as anti-infective agents in that they appear to have potent anti-inflammatory properties.[9] Earlier analyses suggest that azithromycin exposure may confer a mortality advantage in CAP, irrespective of the causative pathogen.[10,11] This

1  
2  
3 observation has resulted in treatment guidelines recommending utilization of macrolides in CAP and their  
4 continuation even if the patient is concurrently being treated with another in vitro active antimicrobial as  
5 one potential approach.[12] Many of the reports supporting a survival benefit related to macrolide use in  
6 CAP, though, have been limited because they either were conducted in an era before HCAP became a  
7 concern or because they often did not account for issues related to rates of initially appropriate  
8 antimicrobial administration. These reports have also explored CAP as a syndrome, regardless of the  
9 pathogen, and not specifically addressed *S. pneumoniae*. Recent descriptions of potential cardiovascular  
10 toxicities arising with azithromycin reinforce the need to elucidate if this agent alters mortality.[13] A  
11 potential survival benefit related to azithromycin in *S. pneumoniae* pneumonia would indicate that the  
12 risk/benefit calculus favors utilization of this agent notwithstanding concerns about rhythm disturbances.  
13  
14  
15  
16  
17  
18  
19  
20  
21  
22  
23

24 We hypothesized that co-treatment with azithromycin would improve mortality in pneumonia due  
25 to *S. pneumoniae* and that this effect would be independent of confounding arising from failure to  
26 administer appropriate initial antibiotic therapy. To explore our hypothesis, we conducted a retrospective  
27 analysis of all subjects with either CAP or HCAP admitted with evidence of infection related to *S.*  
28  
29  
30  
31  
32  
33  
34  
35  
36  
37  
38  
39  
40  
41  
42  
43  
44  
45  
46  
47  
48  
49  
50  
51  
52  
53  
54  
55  
56  
57  
58  
59  
60

## METHODS

### Study Overview and Subjects

We retrospectively identified all adult (age > 18 years) patients admitted with a clinical diagnosis of pneumonia between January 1, 2010 and December 31, 2010. All patients were required to have initially presented to the ED. We defined pneumonia based on both signs and symptoms of infection (ie, elevated white blood cell count or > 10% band forms, fever or hypothermia). We further required compatible chest imaging documenting an infiltrate(s). One investigator (MHK), blinded to the clinical and microbiologic information adjudicated the chest imaging. Identification of *S. pneumoniae* was based on the results of cultures from either blood, pleural fluid, sputum, or the lower airways. A positive urinary antigen for *S. pneumoniae* also was used to document infection with this pathogen. The patients

1  
2  
3 described in this report have been previously included in an earlier analysis validating the concept of  
4  
5 HCAP.[3] The Washington University School of Medicine Human Studies Committee approved the  
6  
7 study (# 201205194). As this was a retrospective analysis, there was no requirement for informed  
8  
9 consent.  
10

### 14 **Endpoints and Co-variates**

16 Hospital mortality represented the primary endpoint. We compared persons with pneumococcal  
17  
18 pneumonia initially treated with azithromycin to those not given this agent. During the observation  
19  
20 period, this was the only macrolide available for treatment of pneumonia at the study hospital. There  
21  
22 were no subjects given clarithromycin. Co-variates of interest included patient demographics, severity of  
23  
24 illness, and infection related variables. For demographic factors we noted age, gender, and race. With  
25  
26 respect to co-morbidities, we recorded if the subject was residing in a nursing home or long-term care  
27  
28 facility, was recently hospitalized in the last 90 days, had received antimicrobials in the last 30 days,  
29  
30 suffered from end stage renal disease requiring hemodialysis, or was immunosuppressed. We defined  
31  
32 immunosuppression based on the presence of either acquired-immunodeficiency syndrome (AIDS), active  
33  
34 malignancy undergoing chemotherapy, or treatment with immunosuppressants (ie, 10 mg prednisone or  
35  
36 equivalent daily for at least 30 days or alternate agents such as methotrexate). To assess disease severity  
37  
38 we calculated the CURB-65 score along with recording if there was a need for either ICU care or  
39  
40 mechanical ventilation (MV).[14] With respect to infection-related variables we determined if bacteremia  
41  
42 complicated the pneumonia and the initial antibiotic regimen. We classified the initial antibiotic regimen  
43  
44 as appropriate if a non-macrolide antibiotic that was *in vitro* active against the *S. pneumoniae* isolate was  
45  
46 administered within 4 hours of presentation. [15] At the host institution, antibiotic administration is  
47  
48 protocolized such that all subjects received a non-macrolide anti-infective with activity against  
49  
50 pneumococcus. Therefore, appropriateness of antibiotics was a reflection of the timeliness of  
51  
52 administration. Additionally, by convention, patients given combination treatment including  
53  
54 azithromycin received these drugs concurrently.  
55  
56  
57  
58  
59  
60

## Statistics

We completed univariate analyses with either the Fisher's exact test or Student's t-test as appropriate. Continuous, non-parametrically distributed data was compared via the Mann-Whitney U test. All analyses were two tailed, and a p value of < 0.05 was assumed to represent statistical significance. To determine independent factors associated with mortality, we employed logistic regression. Variables significant at P<0.10 level in univariate analyses were entered into model. We utilized an enter approach for the regression. Co-linearity was explored with correlation matrices. Adjusted odds ratios (AORs) and ninety-five percent confidence intervals (CIs) are reported where appropriate. The model's goodness-of-fit was assessed via calculation of the R<sup>2</sup> value and the Hosmer-Lemeshow c-statistic. All analyses were performed with SPSS 19.0 (SPSS, Chicago, IL).

## RESULTS

During the study period 977 persons were admitted via the ED with evidence of bacterial pneumonia. Of these patients, 187 were infected with *S. pneumoniae*. The mean age of these subjects was 57.0 +/- 8.2 years and approximately half were male. The crude hospital mortality in *S. pneumoniae* pneumonia equaled 11.2% while the mean hospital length of stay measured 8.2 +/- 5.0 days. The most commonly utilized non-azithromycin antibiotics were ceftriaxone (n=111), cefipeme (n= 31), and moxifloxacin (n=22).

Table 1 reveals the differences in baseline characteristics between subjects dying while hospitalized and those surviving to discharge. Those who died were older but there were no other differences in demographics. Patients dying were more severely ill based on all measures used to assess this. Specifically, survivors had lower CURB-65 scores as compared to decedents (median CURB-65 class 4 vs 2, p=0.025). More than a quarter of those dying received MV while fewer than 5% of those discharged alive required MV (p=0.001). The distribution of criteria defining HCAP did not differ between groups. Approximately 11% of all patients resided in nursing homes prior to admission and the

*Azithromycin and Pneumococcal Pneumonia*

1  
2  
3 rate of admission from nursing homes did not correlate with hospital mortality. Immunosuppression was  
4  
5 prevalent in the study population but this also did not differ between those dying and survivors.  
6

7  
8 With respect to infection-related characteristics, the frequency of bacteremia was similar between  
9  
10 the two groups. Compared to those who survived, however, those who died were more likely to have  
11  
12 been given delayed antibiotic therapy (61.9% vs. 91.0%,  $p=0.001$ ). In all instances, inappropriate therapy  
13  
14 occurred not because of the use of an *in vitro* inactive agent but because of a delay in the initiation of  
15  
16 antibiotics. All isolates were susceptible to the agents actually administered.  
17

18  
19 Hospital mortality rates were significantly lower in persons treated with azithromycin. Of  
20  
21 patients given the macrolide, only 5.6% expired in the hospital as opposed to 23.6% of persons not treated  
22  
23 with such an agent (Figure 1). The odds ratio (OR) for death with a macrolide was 0.20 (94% CI: 0.08-  
24  
25 0.52).  
26

27  
28 In the logistic regression, four variables remained independently associated with mortality (Table  
29  
30 2a). Mortality increased with increasing age (AOR 1.05, 95% CI: 1.01-1.09,  $p=0.018$ ) and with the need  
31  
32 for MV (AOR 8.82, 95% CI: 2.74-28.46,  $<0.001$ ). Timely antibiotic therapy resulted in lower in-hospital  
33  
34 death rates (AOR, 0.13, 95% CI: 0.03-0.46,  $p=0.002$ ). Finally, treatment with azithromycin correlated  
35  
36 with enhanced survival. Azithromycin exposure was independently associated with a reduced risk for  
37  
38 death by nearly 75% (AOR 0.26, 95% CI: 0.08-0.90,  $p=0.018$ ). Neither being classified as HCAP nor  
39  
40 any of the individual criteria defining HCAP stayed in the final model. The model had excellent fit with  
41  
42 an  $R^2$  value of 0.42 and a C-statistic of 0.991. In a sensitivity analysis (Table 2b) where CURB 65 score  
43  
44 was employed as a marker for severity of illness rather than either need for MV or ICU admission,  
45  
46 treatment with azithromycin remained associated with a lower probability for mortality (AOR 0.34, 95%  
47  
48 CI: 0.11-0.88).  
49  
50  
51  
52  
53  
54  
55  
56  
57  
58  
59  
60



**DISCUSSION**

This retrospective analysis of a cohort of patients with microbiologically confirmed pneumococcal pneumonia indicates that co-administration of azithromycin is associated with significant reductions in short-term mortality. This effect is independent of multiple potential confounders such as severity of illness and the timeliness and activity of initial antimicrobial therapy. The positive impact of azithromycin was also independent of whether bacteremia was present.

Prior efforts evaluating the significance of macrolide therapy on outcomes in CAP have reached conflicting conclusions. Some large case series indicate a survival benefit in persons given macrolides while others have failed to detect such an impact. For example, Martin-Loeches and colleagues observed that macrolide use reduced the risk for mortality in intubated patients with CAP.[10] Tessemmer et al. in a large observational German study also noted that macrolide exposure improved cure rates and short-term mortality.[11] In pneumococcal bacteremia complicating pneumonia, Metersky conclude that macrolide use improved 30 day readmission and mortality rates [15]. On the other hand, Asadi and co-workers reported that mortality rates were similar among 3000 patients treated with either monotherapy with a fluoroquinolone as opposed to a beta-lactam /macrolide combination.[17] Wilson et al additionally determined that inclusion of a macrolide in the antibiotic regimen failed to enhance survival in elderly patients with CAP.[18] Meta-analyses are similarly conflicting in their assessments. One recent meta-analysis including 16 randomized controlled trials (RCTs) evaluating fluoroquinolones against beta-lactam/macrolide combinations calculated that there was no difference in mortality between these regimens.[19] Another group of investigators, though, included both observational reports and RCTs and determined that macrolide administration offered a small but statistically significant mortality benefit.[20]

Our findings add to this debate and are novel in several respects. First, one potential limitation of the above-mentioned studies is that they tend to pool all subjects with CAP, irrespective of culture findings. In contrast, we restricted our evaluation to patients with confirmed *S. pneumoniae* infection whether they had CAP or risk factors for HCAP. Including subjects with either syndrome serves to underscore the need to focus on the pathogen rather than the infectious syndrome. Treatment guidelines

*Azithromycin and Pneumococcal Pneumonia*

1  
2  
3 currently stratify persons in to two cohorts based on their risk factors for infection with resistant  
4 pathogens.[7,12] This scheme ignores the point that pneumococcal infection occurs in both CAP and  
5  
6  
7  
8  
9  
10  
11  
12  
13  
14  
15  
16  
17  
18  
19  
20  
21  
22  
23  
24  
25  
26  
27  
28  
29  
30  
31  
32  
33  
34  
35  
36  
37  
38  
39  
40  
41  
42  
43  
44  
45  
46  
47  
48  
49  
50  
51  
52  
53  
54  
55  
56  
57  
58  
59  
60

currently stratify persons in to two cohorts based on their risk factors for infection with resistant pathogens.[7,12] This scheme ignores the point that pneumococcal infection occurs in both CAP and HCAP. Our results suggest that revision of the guidelines may be appropriate as we noted a mortality benefit with azithromycin even after controlling for factors and co-morbidities which define HCAP.

Furthermore, some of the subjects in earlier reports failed to have either evidence of bacterial infection or were infected with a pathogen other than *S. pneumoniae*. In some instances, only administrative coding data rather than actual culture results facilitated subject identification. This distinction is important in that the immunomodulatory effects of azithromycin have been most clearly elucidated as it relates to infection with *S. pneumoniae*. Although broadly anti-inflammatory in a number of ways, the strongest biologic evidence of a potential means for an impact in pulmonary infection relates to investigations in *S. pneumoniae*. More importantly these effects of macrolides alter both cellular and humoral immunity. *In vitro*, azithromycin, for instance, prevents apoptosis of human polymorphonuclear lymphocytes and may reduce interleukin (IL)-8 production.[21,22] Exposure to azithromycin, furthermore, reduces pneumolysin from both macrolide-susceptible and resistant strains of *S. pneumoniae*. [23] Azithromycin may also reduce production of tumor necrosis alpha and IL-1 alpha in human monocytes and down regulate natural killer cell production with an ensuing alteration in various cytokines.[24] Therefore, by focusing on a specific organism where the nexus with the theoretical mechanisms of immune modulation are better established, our observations help to clarify the discordant findings of others. Our results, in turn, suggest that the benefit of macrolide co-treatment may be restricted to persons with pneumococcal infection

We also specifically controlled for the timeliness of initial therapy. Initially appropriate and timely antibiotic treatment is a key determinant of survival in a number of severe infections ranging from bacteremia to septic shock.[25,26] Many prior studies of macrolides and *S. pneumoniae* pneumonia simply did not address the timing of initial antimicrobial therapy. In most RCTs, adjudicating the coverage and timeliness of initial therapy is clouded by the time window allowed to enroll patients in the specific clinical trial. Some observational reports have failed to explore the importance of this issue in

1  
2  
3 their analytic approaches. Others have simply determined whether an antibiotic regimen was concordant  
4 with formal treatment guidelines was given. This constitutes only a surrogate means for evaluating the  
5 true appropriateness of antimicrobial treatment as it does not examine specific *in vitro* susceptibilities or  
6 the timing of the antibiotic administration. We, however, specifically sought to rectify and address this  
7 limitation by applying specific and clear criteria.  
8  
9

10  
11  
12 Our overall patient outcomes suggest that our data are broadly generalizable. The crude hospital  
13 mortality rate was approximately 10%, as was the prevalence of bacteremia, reflecting what has been  
14 noted in multiple epidemiologic analyses.[1] Likewise, the average LOS in our cohort parallels the  
15 general LOS for this syndrome described in large analyses of US hospital discharge data. The goodness  
16 of fit of our final mortality prediction model was also excellent indicating that there is at most moderate  
17 unmeasured residual confounding. Many earlier analyses of case series data have not described either if  
18 or how well their modeling of outcomes fits their observations.  
19  
20  
21  
22  
23  
24  
25  
26  
27  
28

29  
30 Ray and co-workers have sparked concern regarding macrolides and reported potential  
31 cardiovascular toxicity associated with azithromycin.[13] In a review of Medicaid claims data from  
32 Tennessee, these authors state that deaths due to cardiovascular causes were higher in subjects given  
33 azithromycin as compared to either no antibiotic or amoxicillin. This study has led to calls to re-evaluate  
34 our utilization of azithromycin.[27] The potential for a mortality benefit accruing with use of this drug in  
35 pneumococcal pneumonia should give pause to efforts to reflexively and broadly restrict access to  
36 azithromycin. The burden and prevalence of pneumococcal pneumonia suggest that it would be  
37 inappropriate for policy makers to mix all types of *S. pneumoniae* infection into one group as they make  
38 decisions regarding the availability of this agent. Our results suggest that a measured risk-benefit analysis  
39 is still required at the individual patient level.  
40  
41  
42  
43  
44  
45  
46  
47  
48  
49  
50

51 The present study has several significant limitations. First, its retrospective nature exposes it to  
52 several forms of bias. However, unlike clinical cure, there is little potential for bias in determining at  
53 patient's vital status. Confounding by indication is a similar concern. If such confounding were present,  
54 though, we would expect this to bias our data towards the absence of an impact of azithromycin on  
55  
56  
57  
58  
59  
60

*Azithromycin and Pneumococcal Pneumonia*

1  
2  
3 mortality, while we observed precisely the opposite. Second, the data represent the experience from a  
4 single center and thus may not be indicative of the experience of others. Likewise we only studied  
5 inpatients and so our results do not apply to patients not requiring admission. Third, given the constraints  
6 of modern microbiology and culture techniques there are certainly cases of pneumococcal pneumonia we  
7 missed. Fourth, only 5% of the population required ICU admission. As such, our results most reflect the  
8 experience of less severely ill subjects and the significance of azithromycin in critically ill persons may be  
9 different. These, though, are the patients most often cared for by hospitalists. Fifth we lacked  
10 information on certain co-variables that might have affected mortality, specifically underlying pulmonary  
11 and liver disease. Finally, the sample size precluded us from examining several important variables such  
12 as the exact timing of anti-infective administration (eg, by hour delay from presentation). Sample size  
13 also likely explains why some variables were not significant in our final model. That the CURB-65 score  
14 failed to represent a correlate of mortality in our initial model probably arose because other factors  
15 associated with survival (eg, need for MV) proved more strongly linked with mortality. Likewise, the  
16 vast majority of persons given azithromycin also were given a beta-lactam. As a result, few patients  
17 received either azithromycin alone or with moxifloxacin. Hence, we cannot exclude the possibility that  
18 the benefit with the macrolide is either a surrogate for exposure to a beta-lactam agent or a function of the  
19 combined use of azithromycin with this class of antibiotics.

20  
21  
22  
23  
24  
25  
26  
27  
28  
29  
30  
31  
32  
33  
34  
35  
36  
37  
38  
39  
40 In conclusion, co-administration of azithromycin appears to reduce mortality in persons admitted  
41 to the hospital with pneumoniae due to *S. pneumoniae*. This affect persists after adjusting for other  
42 important variables known to correlate with survival in this syndrome. Given the safety issues that have  
43 arisen with azithromycin along with the possible positive impact of this drug on hospital mortality, a  
44 randomized trial exploring the role for adjunctive azithromycin relative to placebo in CAP appears not  
45 only warranted but urgently needed.  
46  
47  
48  
49  
50  
51  
52  
53  
54  
55  
56  
57  
58  
59  
60

**ACKNOWLEDGEMENTS, COMPETING INTERESTS, FUNDING**

Dr. Shorr had full access to the data and takes responsibility for the content of the paper including all analyses.

Author contributions

Study concept and design: AFS, MDZ, JH, JK, STM, MHK

Acquisition of data: JH, JK, STM

Analysis and interpretation of data: AFS, MDZ, STM, MHK

Drafting the manuscript: AFS, MDZ, MHK

Critical revision of the manuscript for important intellectual content: AFS, MDZ, JH, JK, STM, MHK

Statistical expertise: AFS, MDZ

Obtained funding: MHK

Study supervision: AFS, MHK

Disclosures: Dr. Shorr has served as a consultant to, speaker for, or received grant support from:

Astellas, Bayer, Cubist, Forrest, Pfizer, Theravance, and Trius. Dr. Zilberberg has served as a consultant to or received grant support from: Astellas, Forrest, J and J, and Pfizer. Dr. Kollef has served as a consultant, speaker for, or received grant support from: Cubist, Hospria, Merck, and Sage Dr. Micek has received grant support from Cubist, Optimer, Merck, and Pfizer. The remaining authors have no potential conflicts.

Funding: This project was supported by the Barnes-Jewish Hospital Foundation.

**REFERENCES**

1  
2  
3  
4  
5  
6  
7  
8  
9  
10  
11  
12  
13  
14  
15  
16  
17  
18  
19  
20  
21  
22  
23  
24  
25  
26  
27  
28  
29  
30  
31  
32  
33  
34  
35  
36  
37  
38  
39  
40  
41  
42  
43  
44  
45  
46  
47  
48  
49  
50  
51  
52  
53  
54  
55  
56  
57  
58  
59  
60

1: Niederman M. In the clinic. Community-acquired pneumonia. *Ann Intern Med* 2009;**151**:ITC4-2-ITC4-14.

2: Zilberberg MD, Shorr AF. Healthcare-associated pneumonia: the state of evidence to date. *Curr Opin Pulm Med* 2011;**17**:142-7.

3: Shorr AF, Zilberberg MD, Reichley R, Kan J, Hoban A, et al. Validation of a clinical score for assessing the risk of resistant pathogens in patients with pneumonia presenting to the emergency department. *Clin Infect Dis* 2012;**54**:193-8.

4: Lexau CA, Lynfield R, Danila R, Pilishvili T, Facklam R, et al. Changing epidemiology of invasive pneumococcal disease among older adults in the era of pediatric pneumococcal conjugate vaccine. *JAMA*. 2005;**294**:2043-51.

5: Kollef MH, Shorr A, Tabak YP, et al. Epidemiology and outcomes of health-care-associated pneumonia: results from a large US database of culture-positive pneumonia. *Chest* 2005;**128**:3854-62.

6: Schreiber MP, Chan CM, Shorr AF. Resistant pathogens in nonnosocomial pneumonia and respiratory failure: is it time to refine the definition of health-care-associated pneumonia? *Chest* 2010;**137**:1283-8.

7: American Thoracic Society; Infectious Diseases Society of America. Guidelines for the management of adults with hospital-acquired, ventilator-associated, and healthcare-associated pneumonia. *Am J Respir Crit Care Med* 2005;**17**:388-416.

1  
2  
3  
4  
5 8: Johansson N, Kalin M, Tiveljung-Lindell A, Giske CG, Hedlund J. Etiology of community-acquired  
6 pneumonia: increased microbiological yield with new diagnostic methods. *Clin Infect Dis*. 2010;**50**:202-  
7  
8

9  
10 9.

11  
12  
13  
14 9: Kovaleva A, Remmelts HH, Rijkers GT, Hoepelman AI, Biesma DH, et al. Immunomodulatory effects  
15 of macrolides during community-acquired pneumonia: a literature review. *J Antimicrob Chemother*.  
16  
17 2012;**67**:530-40.  
18  
19

20  
21  
22  
23 10: Martin-Loeches I, Lisboa T, Rodriguez A, Putensen C, Annane D, et al. Combination antibiotic  
24 therapy with macrolides improves survival in intubated patients with community-acquired pneumonia.  
25  
26 *Intensive Care Med* 2010;**36**:612-20.  
27  
28

29  
30  
31 11: Tessmer A, Welte T, Martus P, Schnoor M, Marre Ret al. Impact of intravenous {beta}-  
32 lactam/macrolide versus {beta}-lactam monotherapy on mortality in hospitalized patients with  
33  
34 community-acquired pneumonia. *J Antimicrob Chemother* 2009;**63**:1025-33.  
35  
36  
37

38  
39  
40 12: Mandell LA, Wunderink RG, Anzueto A, Bartlett JG, Campbell GD, et al. Infectious Diseases  
41 Society of America/American Thoracic Society consensus guidelines on the management of community-  
42  
43 acquired pneumonia in adults. *Clin Infect Dis* 2007;**44** Suppl 2:S27-72.  
44  
45  
46

47  
48  
49 13: Ray WA, Murray KT, Hall K, Arbogast PG, Stein CM. Azithromycin and the risk of cardiovascular  
50  
51 death. *N Engl J Med* 2012;**366**:1881-90.  
52  
53  
54

1  
2  
3 14: Lim WS, van der Eerden MM, Laing R, Boersma WG, Karalus N, et al. Defining community  
4 acquired pneumonia severity on presentation to hospital: an international derivation and validation study.  
5  
6 Thorax. 2003;**58**:377-82.  
7  
8

9  
10  
11 15: Metersky ML, Ma A, Houck PM, et al. Antibiotics for bacteremic pneumonia: Improved outcomes  
12 with macrolides but not fluoroquinolones. Chest 2007;**131**:466-73.  
13  
14

15  
16  
17 16: Houck PM, Bratzler DW, Nsa W, Ma A, Bartlett JG. Timing of antibiotic administration and  
18 outcomes for Medicare patients hospitalized with community-acquired pneumonia. Arch Intern Med.  
19  
20 2004;**164**:637-44.  
21  
22

23  
24  
25 17: Asadi L, Eurich DT, Gamble JM, Minhas-Sandhu JK, Marrie TJ, et al. Impact of guideline-  
26 concordant antibiotics and macrolide/ $\beta$ -lactam combinations in 3203 patients hospitalized with  
27 pneumonia: prospective cohort study. Clin Microbiol Infect 2012 Jan 30. doi: 10.1111/j.1469-  
28  
29 0691.2012.03783.x. [Epub ahead of print] PubMed PMID: 22404691.  
30  
31  
32

33  
34  
35 18: Wilson BZ, Anzueto A, Restrepo MI, Pugh MJ, Mortensen EM. Comparison of two guideline-  
36 concordant antimicrobial combinations in elderly patients hospitalized with severe community acquired  
37 pneumonia. Crit Care Med 2012 May 22. [Epub ahead of print] PubMed PMID: 22622401.  
38  
39  
40

41  
42  
43 19: Skalsky K, Yahav D, Lador A, Eliakim-Raz N, Leibovici L, et al. Macrolides vs. quinolones for  
44 community-acquired pneumonia: meta-analysis of randomized controlled trials. Clin Microbiol Infect  
45  
46 2012 Mar 24. doi: 10.1111/j.1469-0691.2012.03838.x. [Epub ahead of print] PubMed PMID: 22489673.  
47  
48  
49  
50  
51  
52  
53  
54  
55  
56  
57  
58  
59  
60



- 1  
2  
3 20: Asadi L, Sligl WI, Eurich DT, Colmers IN, Tjosvold L, et al. Macrolide-Based Regimens and  
4  
5 Mortality in Hospitalized Patients With Community-Acquired Pneumonia: A Systematic Review and  
6  
7 Meta-analysis. *Clin Infect Dis* 2012 May 31. [Epub ahead of print] PubMed PMID: 22511553.  
8  
9  
10  
11  
12 21: Koch CC, Esteban DJ, Chin AC, Olson ME, Read RR, et al. Apoptosis, oxidative metabolism and  
13  
14 interleukin-8 production in human neutrophils exposed to azithromycin: effects of *Streptococcus*  
15  
16 *pneumoniae*. *J Antimicrob Chemother* 2000;**46**:19-26.  
17  
18  
19  
20  
21 22: Verleden GM, Vanaudenaerde BM, Dupont LJ, Van Raemdonck DE. Azithromycin reduces airway  
22  
23 neutrophilia and interleukin-8 in patients with bronchiolitis obliterans syndrome. *Am J Respir Crit Care*  
24  
25 *Med* 2006; **174**:566-570.  
26  
27  
28  
29  
30 23: Anderson R, Steel HC, Cockeran R, von Gottberg A, de Gouveia L, et al. Comparison of the effects  
31  
32 of macrolides, amoxicillin, ceftriaxone, doxycycline, tobramycin and fluoroquinolones, on the production  
33  
34 of pneumolysin by *Streptococcus pneumoniae* in vitro. *J Antimicrob Chemother* 2007;**60**:1155-8.  
35  
36  
37  
38 24: Lin SJ, Yan DC, Lee WI, Kuo ML, Hsiao HS, et al. Effect of azithromycin on natural killer cell  
39  
40 function. *Int Immunopharmacol* 2012;**13**:8-14.  
41  
42  
43  
44 25: Kumar A, Ellis P, Arabi Y, Roberts D, Light B, et al. Initiation of inappropriate antimicrobial therapy  
45  
46 results in a fivefold reduction of survival in human septic shock. *Chest* 2009;**136**:1237-48.  
47  
48  
49  
50  
51 26: Micek ST, Lloyd AE, Ritchie DJ, Reichley RM, Fraser VJ, et al. *Pseudomonas aeruginosa*  
52  
53 bloodstream infection: importance of appropriate initial antimicrobial treatment. *Antimicrob Agents*  
54  
55 *Chemother.* 2005;**49**:1306-11.  
56  
57  
58  
59  
60

*Azithromycin and Pneumococcal Pneumonia*

1  
2  
3 27: FDA Statement regarding azithromycin (Zithromax) and the risk of cardiovascular death. Available  
4 at <http://www.fda.gov/Drugs/Drugsafety/ucm304372.htm> accessed 12 Jul 2012.  
5  
6  
7  
8  
9  
10  
11  
12  
13  
14  
15  
16  
17  
18  
19  
20  
21  
22  
23  
24  
25  
26  
27  
28  
29  
30  
31  
32  
33  
34  
35  
36  
37  
38  
39  
40  
41  
42  
43  
44  
45  
46  
47  
48  
49  
50  
51  
52  
53  
54  
55  
56  
57  
58  
59  
60

For peer review only

Baseline CharacteristicsTable 1.

|                                 | Hospital Death (n=21) | Hospital Survival<br>(n=166) | p     |
|---------------------------------|-----------------------|------------------------------|-------|
| <i>Demographics</i>             |                       |                              |       |
| -Age, mean±SD, years            | 66.8±18.23            | 55.7±15.0                    | 0.002 |
| -Male, n,%                      | 10, 47.6%             | 84, 50.6%                    | 0.821 |
| <i>-Race</i>                    |                       |                              |       |
| Caucasian, n,%                  | 10, 47.6%             | 87, 52.4%                    | 0.767 |
| African-American, n,%           | 11, 52.4%             | 77, 46.5%                    |       |
| Other, n,%                      | 0, 0. %               | 2, 1.2%                      |       |
| <i>Severity of Illness</i>      |                       |                              |       |
| -CURB 65 Score, median          | 4                     | 2                            | 0.025 |
| <i>-CURB score distribution</i> |                       |                              |       |
| 0, n,%                          | 0, 0%                 | 28, 16.9%                    |       |
| 1, n,%                          | 2, 9.5%               | 51, 30.7%                    |       |
| 2, n,%                          | 0, 0%                 | 28, 16.9%                    |       |
| 3, n,%                          | 6, 28.6%              | 29, 17.5%                    |       |
| 4, n,%                          | 10, 47.6%             | 25, 15.1%                    |       |
| 5 n,%                           | 3, 14.3%              | 5, 3%                        |       |
| -ICU Admission, n,%             | 5, 22.9%              | 6, 3.6%                      | 0.001 |
| -Mechanical Ventilation, n,%    | 6, 27.8%              | 8, 4.8%                      | 0.001 |
| <i>Comorbidities</i>            |                       |                              |       |
| -LTC admission, n,%             | 2, 11.1%              | 19, 11.4%                    | 0.999 |

*Azithromycin and Pneumococcal Pneumonia*

|                                               |           |            |       |
|-----------------------------------------------|-----------|------------|-------|
| -HD, n,%                                      | 0%        | 4, 2.4%    | 0.999 |
| -Immunosuppression, n,%                       | 7, 33.3%  | 38, 22.9%  | 0.289 |
| -Prior antibiotics, n,%                       | 7, 33.3%  | 40, 24.1%  | 0.423 |
| -Recent hospitalization, n,%                  | 3, 14.1%  | 15, 9.0%   | 0.353 |
| <i>Infection-related Characteristics</i>      |           |            |       |
| -Bacteremia, n,%                              | 3, 14.1%  | 13, 7.8%   | 0.256 |
| - <u>Delay in</u> appropriate antibiotics, %* | 13, 61.9% | 151, 91.0% | 0.001 |
| <i>Non-azithromycin Antibiotic therapy</i>    |           |            |       |
| -Ceftriaxone, n,%                             | 7, 33.3%  | 104, 62.7% |       |
| -Cefipeme, n,%                                | 8, 38.1%  | 23, 13.9%  |       |
| -Moxifloxacin, n, %                           | 1, 4.8%   | 21, 12.7%  |       |
| -Piperacillin/tazobactam, n, %                | 2, 9.5%   | 8, 4.8%    |       |
| -Other, n, %                                  | 3, 14.3%  | 10, 6.0%   |       |

Variables Associated with Hospital MortalityTable 2a

|                         | Unadjusted<br>Odds Ratio | Adjusted Odds<br>Ratio (AOR) | 95% Confidence Interval<br>for AOR | P for AOR |
|-------------------------|--------------------------|------------------------------|------------------------------------|-----------|
| -Age, per year          | --                       | 1.05                         | 1.01-1.09                          | 0.018     |
| -Need for MV            | 8.14                     | 8.82                         | 2.74-28.46                         | 0.001     |
| -Appropriate therapy    | 0.16                     | 0.13                         | 0.03-0.47                          | 0.002     |
| -Use of<br>Azithromycin | 0.20                     | 0.26                         | 0.08-0.80                          | 0.018     |

Sensitivity Analysis for MortalityTable 2b

|                                       | Unadjusted Odds<br>Ratio | Adjusted Odds<br>Ratio (AOR) | 95% Confidence<br>Interval for AOR | P for<br>AOR |
|---------------------------------------|--------------------------|------------------------------|------------------------------------|--------------|
| -Age, per year                        | --                       | 1.02                         | 0.98-1.05                          | 0.368        |
| -CURB-65 score, per<br>point increase | --                       | 2.07                         | 1.32-3.25                          | 0.001        |
| -Appropriate therapy                  | 0.16                     | 0.12                         | 0.03-0.42                          | 0.001        |
| -Use of Azithromycin                  | 0.20                     | 0.34                         | 0.11-0.88                          | 0.041        |

## Hospital Mortality and Azithromycin Treatment Figure 1.

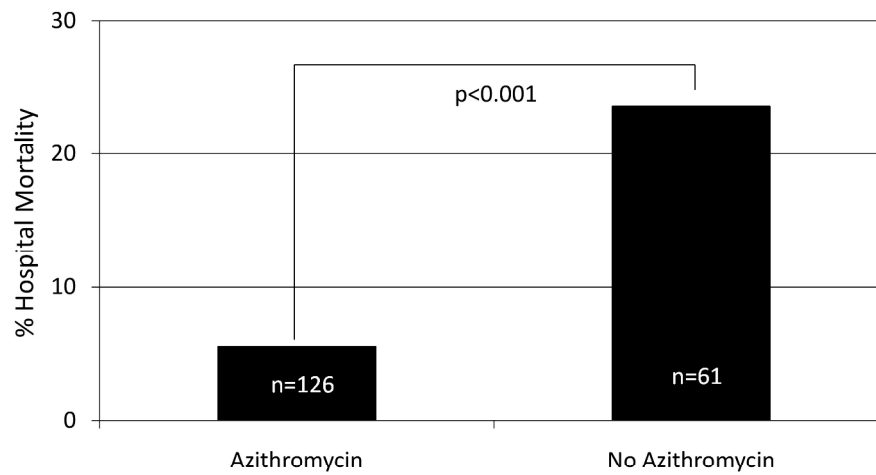

Odds Ratio for Death with Azithromycin: 0.20 (94% CI: 0.08-0.52)

1058x793mm (72 x 72 DPI)

Review only

**STROBE 2007 (v4) checklist of items to be included in reports of observational studies in epidemiology\***  
**Checklist for cohort, case-control, and cross-sectional studies (combined)**

| Section/Topic             | Item # | Recommendation                                                                                                                                                                                                                                                                                                                                                                                                                                                         | Reported on page # |
|---------------------------|--------|------------------------------------------------------------------------------------------------------------------------------------------------------------------------------------------------------------------------------------------------------------------------------------------------------------------------------------------------------------------------------------------------------------------------------------------------------------------------|--------------------|
| Title and abstract        | 1      | (a) Indicate the study’s design with a commonly used term in the title or the abstract                                                                                                                                                                                                                                                                                                                                                                                 | 1                  |
|                           |        | (b) Provide in the abstract an informative and balanced summary of what was done and what was found                                                                                                                                                                                                                                                                                                                                                                    | 3                  |
| <b>Introduction</b>       |        |                                                                                                                                                                                                                                                                                                                                                                                                                                                                        |                    |
| Background/rationale      | 2      | Explain the scientific background and rationale for the investigation being reported                                                                                                                                                                                                                                                                                                                                                                                   | 4                  |
| Objectives                | 3      | State specific objectives, including any pre-specified hypotheses                                                                                                                                                                                                                                                                                                                                                                                                      | 4-5                |
| <b>Methods</b>            |        |                                                                                                                                                                                                                                                                                                                                                                                                                                                                        |                    |
| Study design              | 4      | Present key elements of study design early in the paper                                                                                                                                                                                                                                                                                                                                                                                                                | 5                  |
| Setting                   | 5      | Describe the setting, locations, and relevant dates, including periods of recruitment, exposure, follow-up, and data collection                                                                                                                                                                                                                                                                                                                                        | 5                  |
| Participants              | 6      | (a) <i>Cohort study</i> —Give the eligibility criteria, and the sources and methods of selection of participants. Describe methods of follow-up<br><i>Case-control study</i> —Give the eligibility criteria, and the sources and methods of case ascertainment and control selection. Give the rationale for the choice of cases and controls<br><i>Cross-sectional study</i> —Give the eligibility criteria, and the sources and methods of selection of participants | 5                  |
|                           |        | (b) <i>Cohort study</i> —For matched studies, give matching criteria and number of exposed and unexposed<br><i>Case-control study</i> —For matched studies, give matching criteria and the number of controls per case                                                                                                                                                                                                                                                 |                    |
| Variables                 | 7      | Clearly define all outcomes, exposures, predictors, potential confounders, and effect modifiers. Give diagnostic criteria, if applicable                                                                                                                                                                                                                                                                                                                               | 5-6                |
| Data sources/ measurement | 8*     | For each variable of interest, give sources of data and details of methods of assessment (measurement). Describe comparability of assessment methods if there is more than one group                                                                                                                                                                                                                                                                                   | 5-6                |
| Bias                      | 9      | Describe any efforts to address potential sources of bias                                                                                                                                                                                                                                                                                                                                                                                                              | 6                  |
| Study size                | 10     | Explain how the study size was arrived at                                                                                                                                                                                                                                                                                                                                                                                                                              | 5                  |
| Quantitative variables    | 11     | Explain how quantitative variables were handled in the analyses. If applicable, describe which groupings were chosen and why                                                                                                                                                                                                                                                                                                                                           | 7                  |
| Statistical methods       | 12     | (a) Describe all statistical methods, including those used to control for confounding                                                                                                                                                                                                                                                                                                                                                                                  | 7                  |
|                           |        | (b) Describe any methods used to examine subgroups and interactions                                                                                                                                                                                                                                                                                                                                                                                                    | NA                 |
|                           |        | (c) Explain how missing data were addressed                                                                                                                                                                                                                                                                                                                                                                                                                            | NA                 |
|                           |        | (d) <i>Cohort study</i> —If applicable, explain how loss to follow-up was addressed<br><i>Case-control study</i> —If applicable, explain how matching of cases and controls was addressed                                                                                                                                                                                                                                                                              | NA                 |

|                          |     |                                                                                                                                                                                                              |          |
|--------------------------|-----|--------------------------------------------------------------------------------------------------------------------------------------------------------------------------------------------------------------|----------|
|                          |     | <i>Cross-sectional study</i> —If applicable, describe analytical methods taking account of sampling strategy                                                                                                 |          |
|                          |     | (e) Describe any sensitivity analyses                                                                                                                                                                        | NA       |
| <b>Results</b>           |     |                                                                                                                                                                                                              |          |
| Participants             | 13* | (a) Report numbers of individuals at each stage of study—eg numbers potentially eligible, examined for eligibility, confirmed eligible, included in the study, completing follow-up, and analysed            | 7        |
|                          |     | (b) Give reasons for non-participation at each stage                                                                                                                                                         | NA       |
|                          |     | (c) Consider use of a flow diagram                                                                                                                                                                           | NA       |
| Descriptive data         | 14* | (a) Give characteristics of study participants (eg demographic, clinical, social) and information on exposures and potential confounders                                                                     | 7, Table |
|                          |     | (b) Indicate number of participants with missing data for each variable of interest                                                                                                                          | NA       |
|                          |     | (c) <i>Cohort study</i> —Summarise follow-up time (eg, average and total amount)                                                                                                                             | NA       |
| Outcome data             | 15* | <i>Cohort study</i> —Report numbers of outcome events or summary measures over time                                                                                                                          | 7-8      |
|                          |     | <i>Case-control study</i> —Report numbers in each exposure category, or summary measures of exposure                                                                                                         |          |
|                          |     | <i>Cross-sectional study</i> —Report numbers of outcome events or summary measures                                                                                                                           |          |
| Main results             | 16  | (a) Give unadjusted estimates and, if applicable, confounder-adjusted estimates and their precision (eg, 95% confidence interval). Make clear which confounders were adjusted for and why they were included | 8-9      |
|                          |     | (b) Report category boundaries when continuous variables were categorized                                                                                                                                    | 8-9      |
|                          |     | (c) If relevant, consider translating estimates of relative risk into absolute risk for a meaningful time period                                                                                             | NA       |
| Other analyses           | 17  | Report other analyses done—eg analyses of subgroups and interactions, and sensitivity analyses                                                                                                               | NA       |
| <b>Discussion</b>        |     |                                                                                                                                                                                                              |          |
| Key results              | 18  | Summarise key results with reference to study objectives                                                                                                                                                     | 9        |
| Limitations              | 19  | Discuss limitations of the study, taking into account sources of potential bias or imprecision. Discuss both direction and magnitude of any potential bias                                                   | 11       |
| Interpretation           | 20  | Give a cautious overall interpretation of results considering objectives, limitations, multiplicity of analyses, results from similar studies, and other relevant evidence                                   | 10-11    |
| Generalisability         | 21  | Discuss the generalisability (external validity) of the study results                                                                                                                                        | 11       |
| <b>Other information</b> |     |                                                                                                                                                                                                              |          |
| Funding                  | 22  | Give the source of funding and the role of the funders for the present study and, if applicable, for the original study on which the present article is based                                                | 13       |

\*Give information separately for cases and controls in case-control studies and, if applicable, for exposed and unexposed groups in cohort and cross-sectional studies.

**Note:** An Explanation and Elaboration article discusses each checklist item and gives methodological background and published examples of transparent reporting. The STROBE checklist is best used in conjunction with this article (freely available on the Web sites of PLoS Medicine at <http://www.plosmedicine.org/>, Annals of Internal Medicine at <http://www.annals.org/>, and Epidemiology at <http://www.epidem.com/>). Information on the STROBE Initiative is available at [www.strobe-statement.org](http://www.strobe-statement.org).



## Azithromycin and Survival In *Streptococcus pneumoniae* Pneumonia: A Retrospective Study

Andrew F. Shorr, MD, MPH,<sup>1</sup> Marya D. Zilberberg, MD, MPH,<sup>2</sup> Jason Kan, BS,<sup>3</sup> Justin Hoffman, BS,<sup>3</sup>  
Scott T. Micek, Pharm D,<sup>3</sup> and Marin H. Kollef, MD<sup>4</sup>

From the

(1) Pulmonary and Critical Care Medicine Division, Washington Hospital Center, Washington, DC

(2) EviMed Research Group, LLC, Goshen, MA & University of Massachusetts, Amherst, MA

(3) Department of Pharmacy Barnes-Jewish Hospital, St. Louis, MO

(4) Division of Pulmonary and Critical Care Medicine, Washington University School of Medicine,  
St. Louis, MO

Address all correspondence to:

Andrew F. Shorr, MD, MPH

Pulmonary and Critical Care Medicine

Washington Hospital Center

110 Irving St., NW

Washington, DC 20010

Phone: 202-877-7856

Fax: 202-291-0386

Email: [afshorr@dnamail.com](mailto:afshorr@dnamail.com)

Word Count: 2848

Running head: Azithromycin and Pneumococcal Pneumonia

Key words: Azithromycin, pneumonia, *S. pneumoniae*, survival

This project was supported by the Barnes-Jewish Hospital Foundation to support data extraction but no extramural support was provided.

**ARTICLE SUMMARY****Article focus**

-To determine the impact of azithromycin co-therapy on outcomes in *Streptococcus pneumoniae* pneumonia

**Key messages**

-Azithromycin co-therapy in pneumonia due to *S. pneumoniae* is associated with improved short-term survival

-This finding is independent of multiple potential confounders including timeliness of antibiotic treatment

**Strengths and limitations of this study**

-Strengths: large sample of pure *S. pneumoniae* pneumonia

-Limitations: Data derive from a single center and the study's retrospective design

**ABSTRACT**

Objective: *S. pneumoniae* (SP) represents a major pathogen in pneumonia. The impact of azithromycin on mortality in SP pneumonia remains unclear. Recent safety concerns regarding azithromycin have raised alarm about this agent's role with pneumonia. We sought to clarify the relationship between survival and azithromycin use in SP pneumonia.

Design: Retrospective cohort.

Setting: Urban, academic hospital.

Participants: Adults with a diagnosis of SP pneumonia (Jan-Dec 2010). The diagnosis of pneumonia required a compatible clinical syndrome and radiographic evidence of an infiltrate.

Intervention: None

Primary and secondary outcome measures: Hospital mortality served as the primary endpoint, and we compared subjects given azithromycin to those not treated with this. Co-variables of interest included demographics, severity of illness, comorbidities, and infection related characteristics (eg, appropriateness of initial treatment, bacteremia). We employed logistic regression to assess the independent impact of azithromycin on hospital mortality.

Results: The cohort included 187 subjects (mean age:  $67.0 \pm 8.2$  years, 50.3% male, 5.9% admitted to the ICU). The most frequently utilized non-macrolide antibiotics included: ceftriaxone (n=111), cefipeme (n=31), and moxifloxacin (n=22). Approximately 2/3rds of the cohort received azithromycin. Crude mortality was lower in persons given azithromycin (5.6% vs. 23.6%,  $p<0.01$ ). The final survival model included four variables: age, need for mechanical ventilation, initial appropriate therapy, and azithromycin use. The adjusted odds ratio for mortality associated with azithromycin equaled 0.26 (95% confidence interval: 0.08-0.80,  $p=0.018$ ).

Conclusions: SP pneumonia generally remains associated with substantial mortality while azithromycin treatment is associated with significantly higher survival rates. The impact of azithromycin is independent of multiple potential confounders.

## INTRODUCTION

Pneumonia remains a leading cause of morbidity and mortality. Annually more than 1.3 million patients in the United States (US) present to the hospital with pneumonia and require admission.[1] Direct costs related to pneumonia exceed several billion each year in the US.[1] Because of this burden, multiple efforts have focused on improving the care of patient with pneumonia and attempted to address means for enhancing outcomes in this disease and hospitalists often care for and design hospital pathways for those admitted with pneumonia.

Concurrent with these quality efforts, the microbiology of pneumonia presenting to the hospital has evolved. Over the last decade, pathogens traditionally thought confined to the hospital, such as Methicillin-resistant *Staphylococcus aureus* (MRSA) and *Pseudomonas aeruginosa*, now are implicated in non-nosocomial pneumonia.[2,3] This epidemiologic trend led to the creation of the concept of healthcare-associated pneumonia (HCAP).[2,3] At the same time, rates of pneumonia in adults due to *Streptococcus pneumoniae* have diminished, in part due to the effects of herd immunity arising from the use of the newer vaccines in children.[4] Nonetheless, *S. pneumoniae* remains a leading pathogen in non-nosocomial pneumonia, whether it be CAP or HCAP and whether it results in mild disease or more severe illness necessitating admission to the intensive care unit (ICU).[5,6] Furthermore, current treatment guidelines for HCAP do not suggest consideration of adjunctive macrolide antibiotics, despite the fact that *S. pneumoniae* can still be seen in this syndrome.[3,5,7] While some surveillance studies indicate that *S. pneumoniae* remains the most prevalent pathogen in patients admitted with pneumonia via the ED, other studies suggest that *S. pneumoniae* often represents either the second or third most frequent pathogen in this setting.[5,6,8] Thus, despite it potentially being less prevalent than in prior years, *S. pneumoniae* continues to lead to a disproportionate burden on the healthcare system.

Macrolide antibiotics, particularly azithromycin, are unique as anti-infective agents in that they appear to have potent anti-inflammatory properties.[9] Earlier analyses suggest that azithromycin exposure may confer a mortality advantage in CAP, irrespective of the causative pathogen.[10,11] This

1  
2  
3 observation has resulted in treatment guidelines recommending utilization of macrolides in CAP and their  
4 continuation even if the patient is concurrently being treated with another in vitro active antimicrobial as  
5 one potential approach.[12] Many of the reports supporting a survival benefit related to macrolide use in  
6 CAP, though, have been limited because they either were conducted in an era before HCAP became a  
7 concern or because they often did not account for issues related to rates of initially appropriate  
8 antimicrobial administration. These reports have also explored CAP as a syndrome, regardless of the  
9 pathogen, and not specifically addressed *S. pneumoniae*. Recent descriptions of potential cardiovascular  
10 toxicities arising with azithromycin reinforce the need to elucidate if this agent alters mortality.[13] A  
11 potential survival benefit related to azithromycin in *S. pneumoniae* pneumonia would indicate that the  
12 risk/benefit calculus favors utilization of this agent notwithstanding concerns about rhythm disturbances.  
13  
14  
15  
16  
17  
18  
19  
20  
21  
22  
23

24  
25 We hypothesized that co-treatment with azithromycin would improve mortality in pneumonia due  
26 to *S. pneumoniae* and that this effect would be independent of confounding arising from failure to  
27 administer appropriate initial antibiotic therapy. To explore our hypothesis, we conducted a retrospective  
28 analysis of all subjects with either CAP or HCAP admitted with evidence of infection related to *S.*  
29  
30  
31  
32  
33  
34  
35  
36  
37  
38  
39  
40  
41  
42  
43  
44  
45  
46  
47  
48  
49  
50  
51  
52  
53  
54  
55  
56  
57  
58  
59  
60

## METHODS

### Study Overview and Subjects

We retrospectively identified all adult (age > 18 years) patients admitted with a clinical diagnosis of pneumonia between January 1, 2010 and December 31, 2010. All patients were required to have initially presented to the ED. We defined pneumonia based on both signs and symptoms of infection (ie, elevated white blood cell count or > 10% band forms, fever or hypothermia). We further required compatible chest imaging documenting an infiltrate(s). One investigator (MHK), blinded to the clinical and microbiologic information adjudicated the chest imaging. Identification of *S. pneumoniae* was based on the results of cultures from either blood, pleural fluid, sputum, or the lower airways. A positive urinary antigen for *S. pneumoniae* also was used to document infection with this pathogen. The patients

described in this report have been previously included in an earlier analysis validating the concept of HCAP.[3] The Washington University School of Medicine Human Studies Committee approved the study (# 201205194). As this was a retrospective analysis, there was no requirement for informed consent.

### **Endpoints and Co-variates**

Hospital mortality represented the primary endpoint. We compared persons with pneumococcal pneumonia initially treated with azithromycin to those not given this agent. During the observation period, this was the only macrolide available for treatment of pneumonia at the study hospital. There were no subjects given clarithromycin. Co-variates of interest included patient demographics, severity of illness, and infection related variables. For demographic factors we noted age, gender, and race. With respect to co-morbidities, we recorded if the subject was residing in a nursing home or long-term care facility, was recently hospitalized in the last 90 days, had received antimicrobials in the last 30 days, suffered from end stage renal disease requiring hemodialysis, or was immunosuppressed. We defined immunosuppression based on the presence of either acquired-immunodeficiency syndrome (AIDS), active malignancy undergoing chemotherapy, or treatment with immunosuppressants (ie, 10 mg prednisone or equivalent daily for at least 30 days or alternate agents such as methotrexate). To assess disease severity we calculated the CURB-65 score along with recording if there was a need for either ICU care or mechanical ventilation (MV).[14] With respect to infection-related variables we determined if bacteremia complicated the pneumonia and the initial antibiotic regimen. We classified the initial antibiotic regimen as appropriate if a non-macrolide antibiotic that was *in vitro* active against the *S. pneumoniae* isolate was administered within 4 hours of presentation. [15] At the host institution, antibiotic administration is protocolized such that all subjects received a non-macrolide anti-infective with activity against pneumococcus. Therefore, appropriateness of antibiotics was a reflection of the timeliness of administration. Additionally, by convention, patients given combination treatment including azithromycin received these drugs concurrently.

## Statistics

We completed univariate analyses with either the Fisher's exact test or Student's t-test as appropriate. Continuous, non-parametrically distributed data was compared via the Mann-Whitney U test. All analyses were two tailed, and a p value of < 0.05 was assumed to represent statistical significance. To determine independent factors associated with mortality, we employed logistic regression. Variables significant at P<0.10 level in univariate analyses were entered into model. We utilized an enter approach for the regression. Co-linearity was explored with correlation matrices. Adjusted odds ratios (AORs) and ninety-five percent confidence intervals (CIs) are reported where appropriate. The model's goodness-of-fit was assessed via calculation of the R<sup>2</sup> value and the Hosmer-Lemeshow c-statistic. All analyses were performed with SPSS 19.0 (SPSS, Chicago, IL).

## RESULTS

During the study period 977 persons were admitted via the ED with evidence of bacterial pneumonia. Of these patients, 187 were infected with *S. pneumoniae*. The mean age of these subjects was 57.0 +/- 8.2 years and approximately half were male. The crude hospital mortality in *S. pneumoniae* pneumonia equaled 11.2% while the mean hospital length of stay measured 8.2 +/- 5.0 days. The most commonly utilized non-azithromycin antibiotics were ceftriaxone (n=111), cefipeme (n= 31), and moxifloxacin (n=22).

Table 1 reveals the differences in baseline characteristics between subjects dying while hospitalized and those surviving to discharge. Those who died were older but there were no other differences in demographics. Patients dying were more severely ill based on all measures used to assess this. Specifically, survivors had lower CURB-65 scores as compared to decedents (median CURB-65 class 4 vs 2, p=0.025). More than a quarter of those dying received MV while fewer than 5% of those discharged alive required MV (p=0.001). The distribution of criteria defining HCAP did not differ between groups. Approximately 11% of all patients resided in nursing homes prior to admission and the

*Azithromycin and Pneumococcal Pneumonia*

1  
2  
3 rate of admission from nursing homes did not correlate with hospital mortality. Immunosuppression was  
4  
5 prevalent in the study population but this also did not differ between those dying and survivors.  
6

7  
8 With respect to infection-related characteristics, the frequency of bacteremia was similar between  
9  
10 the two groups. Compared to those who survived, however, those who died were more likely to have  
11  
12 been given delayed antibiotic therapy (61.9% vs. 91.0%,  $p=0.001$ ). In all instances, inappropriate therapy  
13  
14 occurred not because of the use of an *in vitro* inactive agent but because of a delay in the initiation of  
15  
16 antibiotics. All isolates were susceptible to the agents actually administered.  
17

18  
19 Hospital mortality rates were significantly lower in persons treated with azithromycin. Of  
20  
21 patients given the macrolide, only 5.6% expired in the hospital as opposed to 23.6% of persons not treated  
22  
23 with such an agent (Figure 1). The odds ratio (OR) for death with a macrolide was 0.20 (94% CI: 0.08-  
24  
25 0.52).  
26

27  
28 In the logistic regression, four variables remained independently associated with mortality (Table  
29  
30 2a). Mortality increased with increasing age (AOR 1.05, 95% CI: 1.01-1.09,  $p=0.018$ ) and with the need  
31  
32 for MV (AOR 8.82, 95% CI: 2.74-28.46,  $<0.001$ ). Timely antibiotic therapy resulted in lower in-hospital  
33  
34 death rates (AOR, 0.13, 95% CI: 0.03-0.46,  $p=0.002$ ). Finally, treatment with azithromycin correlated  
35  
36 with enhanced survival. Azithromycin exposure was independently associated with a reduced risk for  
37  
38 death by nearly 75% (AOR 0.26, 95% CI: 0.08-0.90,  $p=0.018$ ). Neither being classified as HCAP nor  
39  
40 any of the individual criteria defining HCAP stayed in the final model. The model had excellent fit with  
41  
42 an  $R^2$  value of 0.42 and a C-statistic of 0.991. In a sensitivity analysis (Table 2b) where CURB 65 score  
43  
44 was employed as a marker for severity of illness rather than either need for MV or ICU admission,  
45  
46 treatment with azithromycin remained associated with a lower probability for mortality (AOR 0.34, 95%  
47  
48 CI: 0.11-0.88).  
49  
50  
51  
52  
53  
54  
55  
56  
57  
58  
59  
60



**DISCUSSION**

This retrospective analysis of a cohort of patients with microbiologically confirmed pneumococcal pneumonia indicates that co-administration of azithromycin is associated with significant reductions in short-term mortality. This effect is independent of multiple potential confounders such as severity of illness and the timeliness and activity of initial antimicrobial therapy. The positive impact of azithromycin was also independent of whether bacteremia was present.

Prior efforts evaluating the significance of macrolide therapy on outcomes in CAP have reached conflicting conclusions. Some large case series indicate a survival benefit in persons given macrolides while others have failed to detect such an impact. For example, Martin-Loeches and colleagues observed that macrolide use reduced the risk for mortality in intubated patients with CAP.[10] Tessemmer et al. in a large observational German study also noted that macrolide exposure improved cure rates and short-term mortality.[11] In pneumococcal bacteremia complicating pneumonia, Metersky conclude that macrolide use improved 30 day readmission and mortality rates [15]. On the other hand, Asadi and co-workers reported that mortality rates were similar among 3000 patients treated with either monotherapy with a fluoroquinolone as opposed to a beta-lactam /macrolide combination.[17] Wilson et al additionally determined that inclusion of a macrolide in the antibiotic regimen failed to enhance survival in elderly patients with CAP.[18] Meta-analyses are similarly conflicting in their assessments. One recent meta-analysis including 16 randomized controlled trials (RCTs) evaluating fluoroquinolones against beta-lactam/macrolide combinations calculated that there was no difference in mortality between these regimens.[19] Another group of investigators, though, included both observational reports and RCTs and determined that macrolide administration offered a small but statistically significant mortality benefit.[20]

Our findings add to this debate and are novel in several respects. First, one potential limitation of the above-mentioned studies is that they tend to pool all subjects with CAP, irrespective of culture findings. In contrast, we restricted our evaluation to patients with confirmed *S. pneumoniae* infection whether they had CAP or risk factors for HCAP. Including subjects with either syndrome serves to underscore the need to focus on the pathogen rather than the infectious syndrome. Treatment guidelines

*Azithromycin and Pneumococcal Pneumonia*

1  
2  
3 currently stratify persons in to two cohorts based on their risk factors for infection with resistant  
4 pathogens.[7,12] This scheme ignores the point that pneumococcal infection occurs in both CAP and  
5  
6  
7  
8  
9  
10  
11  
12  
13  
14  
15  
16  
17  
18  
19  
20  
21  
22  
23  
24  
25  
26  
27  
28  
29  
30  
31  
32  
33  
34  
35  
36  
37  
38  
39  
40  
41  
42  
43  
44  
45  
46  
47  
48  
49  
50  
51  
52  
53  
54  
55  
56  
57  
58  
59  
60

currently stratify persons in to two cohorts based on their risk factors for infection with resistant pathogens.[7,12] This scheme ignores the point that pneumococcal infection occurs in both CAP and HCAP. Our results suggest that revision of the guidelines may be appropriate as we noted a mortality benefit with azithromycin even after controlling for factors and co-morbidities which define HCAP.

Furthermore, some of the subjects in earlier reports failed to have either evidence of bacterial infection or were infected with a pathogen other than *S. pneumoniae*. In some instances, only administrative coding data rather than actual culture results facilitated subject identification. This distinction is important in that the immunomodulatory effects of azithromycin have been most clearly elucidated as it relates to infection with *S. pneumoniae*. Although broadly anti-inflammatory in a number of ways, the strongest biologic evidence of a potential means for an impact in pulmonary infection relates to investigations in *S. pneumoniae*. More importantly these effects of macrolides alter both cellular and humoral immunity. *In vitro*, azithromycin, for instance, prevents apoptosis of human polymorphonuclear lymphocytes and may reduce interleukin (IL)-8 production.[21,22] Exposure to azithromycin, furthermore, reduces pneumolysin from both macrolide-susceptible and resistant strains of *S. pneumoniae*. [23] Azithromycin may also reduce production of tumor necrosis alpha and IL-1 alpha in human monocytes and down regulate natural killer cell production with an ensuing alteration in various cytokines.[24] Therefore, by focusing on a specific organism where the nexus with the theoretical mechanisms of immune modulation are better established, our observations help to clarify the discordant findings of others. Our results, in turn, suggest that the benefit of macrolide co-treatment may be restricted to persons with pneumococcal infection

We also specifically controlled for the timeliness of initial therapy. Initially appropriate and timely antibiotic treatment is a key determinant of survival in a number of severe infections ranging from bacteremia to septic shock.[25,26] Many prior studies of macrolides and *S. pneumoniae* pneumonia simply did not address the timing of initial antimicrobial therapy. In most RCTs, adjudicating the coverage and timeliness of initial therapy is clouded by the time window allowed to enroll patients in the specific clinical trial. Some observational reports have failed to explore the importance of this issue in

1  
2  
3 their analytic approaches. Others have simply determined whether an antibiotic regimen was concordant  
4 with formal treatment guidelines was given. This constitutes only a surrogate means for evaluating the  
5 true appropriateness of antimicrobial treatment as it does not examine specific *in vitro* susceptibilities or  
6 the timing of the antibiotic administration. We, however, specifically sought to rectify and address this  
7 limitation by applying specific and clear criteria.  
8  
9

10  
11  
12 Our overall patient outcomes suggest that our data are broadly generalizable. The crude hospital  
13 mortality rate was approximately 10%, as was the prevalence of bacteremia, reflecting what has been  
14 noted in multiple epidemiologic analyses.[1] Likewise, the average LOS in our cohort parallels the  
15 general LOS for this syndrome described in large analyses of US hospital discharge data. The goodness  
16 of fit of our final mortality prediction model was also excellent indicating that there is at most moderate  
17 unmeasured residual confounding. Many earlier analyses of case series data have not described either if  
18 or how well their modeling of outcomes fits their observations.  
19  
20  
21  
22  
23  
24  
25  
26  
27  
28

29  
30 Ray and co-workers have sparked concern regarding macrolides and reported potential  
31 cardiovascular toxicity associated with azithromycin.[13] In a review of Medicaid claims data from  
32 Tennessee, these authors state that deaths due to cardiovascular causes were higher in subjects given  
33 azithromycin as compared to either no antibiotic or amoxicillin. This study has led to calls to re-evaluate  
34 our utilization of azithromycin.[27] The potential for a mortality benefit accruing with use of this drug in  
35 pneumococcal pneumonia should give pause to efforts to reflexively and broadly restrict access to  
36 azithromycin. The burden and prevalence of pneumococcal pneumonia suggest that it would be  
37 inappropriate for policy makers to mix all types of *S. pneumoniae* infection into one group as they make  
38 decisions regarding the availability of this agent. Our results suggest that a measured risk-benefit analysis  
39 is still required at the individual patient level.  
40  
41  
42  
43  
44  
45  
46  
47  
48  
49  
50

51  
52 The present study has several significant limitations. First, its retrospective nature exposes it to  
53 several forms of bias. However, unlike clinical cure, there is little potential for bias in determining at  
54 patient's vital status. Confounding by indication is a similar concern. If such confounding were present,  
55 though, we would expect this to bias our data towards the absence of an impact of azithromycin on  
56  
57  
58  
59  
60

*Azithromycin and Pneumococcal Pneumonia*

1  
2  
3 mortality, while we observed precisely the opposite. Second, the data represent the experience from a  
4 single center and thus may not be indicative of the experience of others. Likewise we only studied  
5 inpatients and so our results do not apply to patients not requiring admission. Third, given the constraints  
6 of modern microbiology and culture techniques there are certainly cases of pneumococcal pneumonia we  
7 missed. Fourth, only 5% of the population required ICU admission. As such, our results most reflect the  
8 experience of less severely ill subjects and the significance of azithromycin in critically ill persons may be  
9 different. These, though, are the patients most often cared for by hospitalists. Fifth we lacked  
10 information on certain co-variables that might have affected mortality, specifically underlying pulmonary  
11 and liver disease. Finally, the sample size precluded us from examining several important variables such  
12 as the exact timing of anti-infective administration (eg, by hour delay from presentation). Sample size  
13 also likely explains why some variables were not significant in our final model. That the CURB-65 score  
14 failed to represent a correlate of mortality in our initial model probably arose because other factors  
15 associated with survival (eg, need for MV) proved more strongly linked with mortality. Likewise, the  
16 vast majority of persons given azithromycin also were given a beta-lactam. As a result, few patients  
17 received either azithromycin alone or with moxifloxacin. Hence, we cannot exclude the possibility that  
18 the benefit with the macrolide is either a surrogate for exposure to a beta-lactam agent or a function of the  
19 combined use of azithromycin with this class of antibiotics.

20  
21  
22  
23  
24  
25  
26  
27  
28  
29  
30  
31  
32  
33  
34  
35  
36  
37  
38  
39  
40 In conclusion, co-administration of azithromycin appears to reduce mortality in persons admitted  
41 to the hospital with pneumoniae due to *S. pneumoniae*. This affect persists after adjusting for other  
42 important variables known to correlate with survival in this syndrome. Given the safety issues that have  
43 arisen with azithromycin along with the possible positive impact of this drug on hospital mortality, a  
44 randomized trial exploring the role for adjunctive azithromycin relative to placebo in CAP appears not  
45 only warranted but urgently needed.  
46  
47  
48  
49  
50  
51  
52  
53  
54  
55  
56  
57  
58  
59  
60

**ACKNOWLEDGEMENTS, COMPETING INTERESTS, FUNDING**

Dr. Shorr had full access to the data and takes responsibility for the content of the paper including all analyses.

Author contributions

Study concept and design: AFS, MDZ, JH, JK, STM, MHK

Acquisition of data: JH, JK, STM

Analysis and interpretation of data: AFS, MDZ, STM, MHK

Drafting the manuscript: AFS, MDZ, MHK

Critical revision of the manuscript for important intellectual content: AFS, MDZ, JH, JK, STM, MHK

Statistical expertise: AFS, MDZ

Obtained funding: MHK

Study supervision: AFS, MHK

Disclosures: Dr. Shorr has served as a consultant to, speaker for, or received grant support from:

Astellas, Bayer, Cubist, Forrest, Pfizer, Theravance, and Trius. Dr. Zilberberg has served as a consultant to or received grant support from: Astellas, Forrest, J and J, and Pfizer. Dr. Kollef has served as a consultant, speaker for, or received grant support from: Cubist, Hospria, Merck, and Sage Dr. Micek has received grant support from Cubist, Optimer, Merck, and Pfizer. The remaining authors have no potential conflicts.

Funding: This project was supported by the Barnes-Jewish Hospital Foundation.

**REFERENCES**

1  
2  
3  
4  
5  
6  
7  
8  
9  
10  
11  
12  
13  
14  
15  
16  
17  
18  
19  
20  
21  
22  
23  
24  
25  
26  
27  
28  
29  
30  
31  
32  
33  
34  
35  
36  
37  
38  
39  
40  
41  
42  
43  
44  
45  
46  
47  
48  
49  
50  
51  
52  
53  
54  
55  
56  
57  
58  
59  
60

1: Niederman M. In the clinic. Community-acquired pneumonia. *Ann Intern Med* 2009;**151**:ITC4-2-ITC4-14.

2: Zilberberg MD, Shorr AF. Healthcare-associated pneumonia: the state of evidence to date. *Curr Opin Pulm Med* 2011;**17**:142-7.

3: Shorr AF, Zilberberg MD, Reichley R, Kan J, Hoban A, et al. Validation of a clinical score for assessing the risk of resistant pathogens in patients with pneumonia presenting to the emergency department. *Clin Infect Dis* 2012;**54**:193-8.

4: Lexau CA, Lynfield R, Danila R, Pilishvili T, Facklam R, et al. Changing epidemiology of invasive pneumococcal disease among older adults in the era of pediatric pneumococcal conjugate vaccine. *JAMA*. 2005;**294**:2043-51.

5: Kollef MH, Shorr A, Tabak YP, et al. Epidemiology and outcomes of health-care-associated pneumonia: results from a large US database of culture-positive pneumonia. *Chest* 2005;**128**:3854-62.

6: Schreiber MP, Chan CM, Shorr AF. Resistant pathogens in nonnosocomial pneumonia and respiratory failure: is it time to refine the definition of health-care-associated pneumonia? *Chest* 2010;**137**:1283-8.

7: American Thoracic Society; Infectious Diseases Society of America. Guidelines for the management of adults with hospital-acquired, ventilator-associated, and healthcare-associated pneumonia. *Am J Respir Crit Care Med* 2005;**17**:388-416.

1  
2  
3  
4  
5 8: Johansson N, Kalin M, Tiveljung-Lindell A, Giske CG, Hedlund J. Etiology of community-acquired  
6 pneumonia: increased microbiological yield with new diagnostic methods. *Clin Infect Dis*. 2010;**50**:202-

7  
8  
9 9.

10  
11  
12  
13  
14 9: Kovaleva A, Remmelts HH, Rijkers GT, Hoepelman AI, Biesma DH, et al. Immunomodulatory effects  
15 of macrolides during community-acquired pneumonia: a literature review. *J Antimicrob Chemother*.  
16  
17 2012;**67**:530-40.  
18  
19

20  
21  
22  
23 10: Martin-Loeches I, Lisboa T, Rodriguez A, Putensen C, Annane D, et al. Combination antibiotic  
24 therapy with macrolides improves survival in intubated patients with community-acquired pneumonia.  
25  
26 *Intensive Care Med* 2010;**36**:612-20.  
27  
28

29  
30  
31 11: Tessmer A, Welte T, Martus P, Schnoor M, Marre Ret al. Impact of intravenous {beta}-  
32 lactam/macrolide versus {beta}-lactam monotherapy on mortality in hospitalized patients with  
33  
34 community-acquired pneumonia. *J Antimicrob Chemother* 2009;**63**:1025-33.  
35  
36  
37

38  
39  
40 12: Mandell LA, Wunderink RG, Anzueto A, Bartlett JG, Campbell GD, et al. Infectious Diseases  
41 Society of America/American Thoracic Society consensus guidelines on the management of community-  
42  
43 acquired pneumonia in adults. *Clin Infect Dis* 2007;**44** Suppl 2:S27-72.  
44  
45  
46

47  
48  
49 13: Ray WA, Murray KT, Hall K, Arbogast PG, Stein CM. Azithromycin and the risk of cardiovascular  
50  
51 death. *N Engl J Med* 2012;**366**:1881-90.  
52  
53  
54

1  
2  
3 14: Lim WS, van der Eerden MM, Laing R, Boersma WG, Karalus N, et al. Defining community  
4 acquired pneumonia severity on presentation to hospital: an international derivation and validation study.  
5  
6  
7  
8 Thorax. 2003;**58**:377-82.  
9

10  
11  
12 15: Metersky ML, Ma A, Houck PM, et al. Antibiotics for bacteremic pneumonia: Improved outcomes  
13  
14 with macrolides but not fluoroquinolones. Chest 2007;**131**:466-73.  
15  
16

17  
18 16: Houck PM, Bratzler DW, Nsa W, Ma A, Bartlett JG. Timing of antibiotic administration and  
19  
20 outcomes for Medicare patients hospitalized with community-acquired pneumonia. Arch Intern Med.  
21  
22 2004;**164**:637-44.  
23  
24

25  
26  
27 17: Asadi L, Eurich DT, Gamble JM, Minhas-Sandhu JK, Marrie TJ, et al. Impact of guideline-  
28  
29 concordant antibiotics and macrolide/ $\beta$ -lactam combinations in 3203 patients hospitalized with  
30  
31 pneumonia: prospective cohort study. Clin Microbiol Infect 2012 Jan 30. doi: 10.1111/j.1469-  
32  
33 0691.2012.03783.x. [Epub ahead of print] PubMed PMID: 22404691.  
34  
35

36  
37  
38 18: Wilson BZ, Anzueto A, Restrepo MI, Pugh MJ, Mortensen EM. Comparison of two guideline-  
39  
40 concordant antimicrobial combinations in elderly patients hospitalized with severe community acquired  
41  
42 pneumonia. Crit Care Med 2012 May 22. [Epub ahead of print] PubMed PMID: 22622401.  
43  
44

45  
46  
47 19: Skalsky K, Yahav D, Lador A, Eliakim-Raz N, Leibovici L, et al. Macrolides vs. quinolones for  
48  
49 community-acquired pneumonia: meta-analysis of randomized controlled trials. Clin Microbiol Infect  
50  
51 2012 Mar 24. doi: 10.1111/j.1469-0691.2012.03838.x. [Epub ahead of print] PubMed PMID: 22489673.  
52  
53  
54  
55  
56  
57  
58  
59  
60



1  
2  
3 20: Asadi L, Sligl WI, Eurich DT, Colmers IN, Tjosvold L, et al. Macrolide-Based Regimens and  
4  
5 Mortality in Hospitalized Patients With Community-Acquired Pneumonia: A Systematic Review and  
6  
7 Meta-analysis. *Clin Infect Dis* 2012 May 31. [Epub ahead of print] PubMed PMID: 22511553.  
8  
9

10  
11  
12 21: Koch CC, Esteban DJ, Chin AC, Olson ME, Read RR, et al. Apoptosis, oxidative metabolism and  
13  
14 interleukin-8 production in human neutrophils exposed to azithromycin: effects of *Streptococcus*  
15  
16 *pneumoniae*. *J Antimicrob Chemother* 2000;**46**:19-26.  
17  
18

19  
20  
21 22: Verleden GM, Vanaudenaerde BM, Dupont LJ, Van Raemdonck DE. Azithromycin reduces airway  
22  
23 neutrophilia and interleukin-8 in patients with bronchiolitis obliterans syndrome. *Am J Respir Crit Care*  
24  
25 *Med* 2006; **174**:566-570.  
26  
27

28  
29  
30 23: Anderson R, Steel HC, Cockeran R, von Gottberg A, de Gouveia L, et al. Comparison of the effects  
31  
32 of macrolides, amoxicillin, ceftriaxone, doxycycline, tobramycin and fluoroquinolones, on the production  
33  
34 of pneumolysin by *Streptococcus pneumoniae* in vitro. *J Antimicrob Chemother* 2007;**60**:1155-8.  
35  
36

37  
38 24: Lin SJ, Yan DC, Lee WI, Kuo ML, Hsiao HS, et al. Effect of azithromycin on natural killer cell  
39  
40 function. *Int Immunopharmacol* 2012;**13**:8-14.  
41  
42

43  
44 25: Kumar A, Ellis P, Arabi Y, Roberts D, Light B, et al. Initiation of inappropriate antimicrobial therapy  
45  
46 results in a fivefold reduction of survival in human septic shock. *Chest* 2009;**136**:1237-48.  
47  
48

49  
50  
51 26: Micek ST, Lloyd AE, Ritchie DJ, Reichley RM, Fraser VJ, et al. *Pseudomonas aeruginosa*  
52  
53 bloodstream infection: importance of appropriate initial antimicrobial treatment. *Antimicrob Agents*  
54  
55 *Chemother.* 2005;**49**:1306-11.  
56  
57  
58  
59  
60

*Azithromycin and Pneumococcal Pneumonia*

1  
2  
3 27: FDA Statement regarding azithromycin (Zithromax) and the risk of cardiovascular death. Available  
4 at <http://www.fda.gov/Drugs/Drugsafety/ucm304372.htm> accessed 12 Jul 2012.  
5  
6  
7  
8  
9  
10  
11  
12  
13  
14  
15  
16  
17  
18  
19  
20  
21  
22  
23  
24  
25  
26  
27  
28  
29  
30  
31  
32  
33  
34  
35  
36  
37  
38  
39  
40  
41  
42  
43  
44  
45  
46  
47  
48  
49  
50  
51  
52  
53  
54  
55  
56  
57  
58  
59  
60

For peer review only

Baseline CharacteristicsTable 1.

|                                 | Hospital Death (n=21) | Hospital Survival<br>(n=166) | p     |
|---------------------------------|-----------------------|------------------------------|-------|
| <i>Demographics</i>             |                       |                              |       |
| -Age, mean±SD, years            | 66.8±18.23            | 55.7±15.0                    | 0.002 |
| -Male, n,%                      | 10, 47.6%             | 84, 50.6%                    | 0.821 |
| <i>-Race</i>                    |                       |                              |       |
| Caucasian, n,%                  | 10, 47.6%             | 87, 52.4%                    | 0.767 |
| African-American, n,%           | 11, 52.4%             | 77, 46.5%                    |       |
| Other, n,%                      | 0, 0. %               | 2, 1.2%                      |       |
| <i>Severity of Illness</i>      |                       |                              |       |
| -CURB 65 Score, median          | 4                     | 2                            | 0.025 |
| <i>-CURB score distribution</i> |                       |                              |       |
| 0, n,%                          | 0, 0%                 | 28, 16.9%                    |       |
| 1, n,%                          | 2, 9.5%               | 51, 30.7%                    |       |
| 2, n,%                          | 0, 0%                 | 28, 16.9%                    |       |
| 3, n,%                          | 6, 28.6%              | 29, 17.5%                    |       |
| 4, n,%                          | 10, 47.6%             | 25, 15.1%                    |       |
| 5 n,%                           | 3, 14.3%              | 5, 3%                        |       |
| -ICU Admission, n,%             | 5, 22.9%              | 6, 3.6%                      | 0.001 |
| -Mechanical Ventilation, n,%    | 6, 27.8%              | 8, 4.8%                      | 0.001 |
| <i>Comorbidities</i>            |                       |                              |       |
| -LTC admission, n,%             | 2, 11.1%              | 19, 11.4%                    | 0.999 |

*Azithromycin and Pneumococcal Pneumonia*

|                                               |           |            |       |
|-----------------------------------------------|-----------|------------|-------|
| -HD, n,%                                      | 0%        | 4, 2.4%    | 0.999 |
| -Immunosuppression, n,%                       | 7, 33.3%  | 38, 22.9%  | 0.289 |
| -Prior antibiotics, n,%                       | 7, 33.3%  | 40, 24.1%  | 0.423 |
| -Recent hospitalization, n,%                  | 3, 14.1%  | 15, 9.0%   | 0.353 |
| <i>Infection-related Characteristics</i>      |           |            |       |
| -Bacteremia, n,%                              | 3, 14.1%  | 13, 7.8%   | 0.256 |
| - <u>Delay in</u> appropriate antibiotics, %* | 13, 61.9% | 151, 91.0% | 0.001 |
| <i>Non-azithromycin Antibiotic therapy</i>    |           |            |       |
| -Ceftriaxone, n,%                             | 7, 33.3%  | 104, 62.7% |       |
| -Cefipeme, n,%                                | 8, 38.1%  | 23, 13.9%  |       |
| -Moxifloxacin, n, %                           | 1, 4.8%   | 21, 12.7%  |       |
| -Piperacillin/tazobactam, n, %                | 2, 9.5%   | 8, 4.8%    |       |
| -Other, n, %                                  | 3, 14.3%  | 10, 6.0%   |       |

Variables Associated with Hospital MortalityTable 2a

|                         | Unadjusted<br>Odds Ratio | Adjusted Odds<br>Ratio (AOR) | 95% Confidence Interval<br>for AOR | P for AOR |
|-------------------------|--------------------------|------------------------------|------------------------------------|-----------|
| -Age, per year          | --                       | 1.05                         | 1.01-1.09                          | 0.018     |
| -Need for MV            | 8.14                     | 8.82                         | 2.74-28.46                         | 0.001     |
| -Appropriate therapy    | 0.16                     | 0.13                         | 0.03-0.47                          | 0.002     |
| -Use of<br>Azithromycin | 0.20                     | 0.26                         | 0.08-0.80                          | 0.018     |

Sensitivity Analysis for MortalityTable 2b

|                                       | Unadjusted Odds<br>Ratio | Adjusted Odds<br>Ratio (AOR) | 95% Confidence<br>Interval for AOR | P for<br>AOR |
|---------------------------------------|--------------------------|------------------------------|------------------------------------|--------------|
| -Age, per year                        | --                       | 1.02                         | 0.98-1.05                          | 0.368        |
| -CURB-65 score, per<br>point increase | --                       | 2.07                         | 1.32-3.25                          | 0.001        |
| -Appropriate therapy                  | 0.16                     | 0.12                         | 0.03-0.42                          | 0.001        |
| -Use of Azithromycin                  | 0.20                     | 0.34                         | 0.11-0.88                          | 0.041        |



## Azithromycin and Survival In *Streptococcus pneumoniae* Pneumonia: A Retrospective Study

|                                    |                                                                                                                                                                                                                                                         |
|------------------------------------|---------------------------------------------------------------------------------------------------------------------------------------------------------------------------------------------------------------------------------------------------------|
| Journal:                           | <i>BMJ Open</i>                                                                                                                                                                                                                                         |
| Manuscript ID:                     | bmjopen-2013-002898.R2                                                                                                                                                                                                                                  |
| Article Type:                      | Research                                                                                                                                                                                                                                                |
| Date Submitted by the Author:      | 11-Jan-2013                                                                                                                                                                                                                                             |
| Complete List of Authors:          | Shorr, Andrew; Washington Hospital Center, Medicine<br>Zilberberg, Marya; EviMed,<br>Kan, Jason; Barnes Jewish Hospital,<br>Hoffman, Justin; Barnes Jewish Hospital,<br>Micek, Scott; Barnes Jewish Hospital,<br>Kollef, Marin; Barnes Jewish Hospital, |
| <b>Primary Subject<br>Heading</b>: | Infectious diseases                                                                                                                                                                                                                                     |
| Secondary Subject Heading:         | Intensive care, Pharmacology and therapeutics, Respiratory medicine                                                                                                                                                                                     |
| Keywords:                          | Epidemiology < INFECTIOUS DISEASES, Adult intensive & critical care < INTENSIVE & CRITICAL CARE, Protocols & guidelines < HEALTH SERVICES ADMINISTRATION & MANAGEMENT                                                                                   |
|                                    |                                                                                                                                                                                                                                                         |

SCHOLARONE™  
Manuscripts

## Azithromycin and Survival In *Streptococcus pneumoniae* Pneumonia: A Retrospective Study

Andrew F. Shorr, MD, MPH,<sup>1</sup> Marya D. Zilberberg, MD, MPH,<sup>2</sup> Jason Kan, BS,<sup>3</sup> Justin Hoffman, BS,<sup>3</sup>  
Scott T. Micek, Pharm D,<sup>3</sup> and Marin H. Kollef, MD<sup>4</sup>

From the

- (1) Pulmonary and Critical Care Medicine Division, Washington Hospital Center, Washington, DC
- (2) EviMed Research Group, LLC, Goshen, MA & University of Massachusetts, Amherst, MA
- (3) Department of Pharmacy Barnes-Jewish Hospital, St. Louis, MO
- (4) Division of Pulmonary and Critical Care Medicine, Washington University School of Medicine, St. Louis, MO

Address all correspondence to:

Andrew F. Shorr, MD, MPH  
Pulmonary and Critical Care Medicine  
Washington Hospital Center  
110 Irving St., NW  
Washington, DC 20010  
Phone: 202-877-7856  
Fax: 202-291-0386  
Email: [afshorr@dnamail.com](mailto:afshorr@dnamail.com)

Word Count: 2480

Running head: Azithromycin and Pneumococcal Pneumonia

Key words: Azithromycin, pneumonia, *S. pneumoniae*, survival

This project was supported by the Barnes-Jewish Hospital Foundation to support data extraction but no extramural support was provided.

**ARTICLE SUMMARY****Article focus**

-To determine the impact of azithromycin co-therapy on outcomes in *Streptococcus pneumoniae* pneumonia

**Key messages**

-Azithromycin co-therapy in pneumonia due to *S. pneumoniae* is associated with improved short-term survival

-This finding is independent of multiple potential confounders including timeliness of antibiotic treatment

**Strengths and limitations of this study**

-Strengths: large sample of pure *S. pneumoniae* pneumonia

-Limitations: Data derive from a single center and the study's retrospective design



**ABSTRACT**

Objective: *S. pneumoniae* (SP) represents a major pathogen in pneumonia. The impact of azithromycin on mortality in SP pneumonia remains unclear. Recent safety concerns regarding azithromycin have raised alarm about this agent's role with pneumonia. We sought to clarify the relationship between survival and azithromycin use in SP pneumonia.

Design: Retrospective cohort.

Setting: Urban, academic hospital.

Participants: Adults with a diagnosis of SP pneumonia (Jan-Dec 2010). The diagnosis of pneumonia required a compatible clinical syndrome and radiographic evidence of an infiltrate.

Intervention: None

Primary and secondary outcome measures: Hospital mortality served as the primary endpoint, and we compared subjects given azithromycin to those not treated with this. Co-variables of interest included demographics, severity of illness, comorbidities, and infection related characteristics (eg, appropriateness of initial treatment, bacteremia). We employed logistic regression to assess the independent impact of azithromycin on hospital mortality.

Results: The cohort included 187 subjects (mean age:  $67.0 \pm 8.2$  years, 50.3% male, 5.9% admitted to the ICU). The most frequently utilized non-macrolide antibiotics included: ceftriaxone (n=111), cefipeme (n=31), and moxifloxacin (n=22). Approximately 2/3rds of the cohort received azithromycin. Crude mortality was lower in persons given azithromycin (5.6% vs. 23.6%,  $p<0.01$ ). The final survival model included four variables: age, need for mechanical ventilation, initial appropriate therapy, and azithromycin use. The adjusted odds ratio for mortality associated with azithromycin equaled 0.26 (95% confidence interval: 0.08-0.80,  $p=0.018$ ).

Conclusions: SP pneumonia generally remains associated with substantial mortality while azithromycin treatment is associated with significantly higher survival rates. The impact of azithromycin is independent of multiple potential confounders.

## INTRODUCTION

Pneumonia remains a leading cause of morbidity and mortality. Annually more than 1.3 million patients in the United States (US) present to the hospital with pneumonia and require admission.[1] Direct costs related to pneumonia exceed several billion each year in the US.[1] Because of this burden, multiple efforts have focused on improving the care of patient with pneumonia and attempted to address means for enhancing outcomes in this disease and hospitalists often care for and design hospital pathways for those admitted with pneumonia.

Concurrent with these quality efforts, the microbiology of pneumonia presenting to the hospital has evolved. Over the last decade, pathogens traditionally thought confined to the hospital, such as Methicillin-resistant *Staphylococcus aureus* (MRSA) and *Pseudomonas aeruginosa*, now are implicated in non-nosocomial pneumonia.[2,3] This epidemiologic trend led to the creation of the concept of healthcare-associated pneumonia (HCAP).[2,3] At the same time, rates of pneumonia in adults due to *Streptococcus pneumoniae* have diminished, in part due to the effects of herd immunity arising from the use of the newer vaccines in children.[4] Nonetheless, *S. pneumoniae* remains a leading pathogen in non-nosocomial pneumonia, whether it be CAP or HCAP and whether it results in mild disease or more severe illness necessitating admission to the intensive care unit (ICU).[5,6] Furthermore, current treatment guidelines for HCAP do not suggest consideration of adjunctive macrolide antibiotics, despite the fact that *S. pneumoniae* can still be seen in this syndrome.[3,5,7] While some surveillance studies indicate that *S. pneumoniae* remains the most prevalent pathogen in patients admitted with pneumonia via the ED, other studies suggest that *S. pneumoniae* often represents either the second or third most frequent pathogen in this setting.[5,6,8] Thus, despite it potentially being less prevalent than in prior years, *S. pneumoniae* continues to lead to a disproportionate burden on the healthcare system.

Macrolide antibiotics, particularly azithromycin, are unique as anti-infective agents in that they appear to have potent anti-inflammatory properties.[9] Earlier analyses suggest that azithromycin exposure may confer a mortality advantage in CAP, irrespective of the causative pathogen.[10,11] This

1  
2  
3 observation has resulted in treatment guidelines recommending utilization of macrolides in CAP and their  
4 continuation even if the patient is concurrently being treated with another in vitro active antimicrobial as  
5 one potential approach.[12] Many of the reports supporting a survival benefit related to macrolide use in  
6 CAP, though, have been limited because they either were conducted in an era before HCAP became a  
7 concern or because they often did not account for issues related to rates of initially appropriate  
8 antimicrobial administration. These reports have also explored CAP as a syndrome, regardless of the  
9 pathogen, and not specifically addressed *S. pneumoniae*. Recent descriptions of potential cardiovascular  
10 toxicities arising with azithromycin reinforce the need to elucidate if this agent alters mortality.[13] A  
11 potential survival benefit related to azithromycin in *S. pneumoniae* pneumonia would indicate that the  
12 risk/benefit calculus favors utilization of this agent notwithstanding concerns about rhythm disturbances.  
13  
14  
15  
16  
17  
18  
19  
20  
21  
22  
23  
24

25 We hypothesized that co-treatment with azithromycin would improve mortality in pneumonia due  
26 to *S. pneumoniae* and that this effect would be independent of confounding arising from failure to  
27 administer appropriate initial antibiotic therapy. To explore our hypothesis, we conducted a retrospective  
28 analysis of all subjects with either CAP or HCAP admitted with evidence of infection related to *S.*  
29 *pneumoniae*.  
30  
31  
32  
33  
34  
35  
36  
37

## 38 METHODS

### 39 Study Overview and Subjects

40  
41  
42 We retrospectively identified all adult (age > 18 years) patients admitted with a clinical diagnosis  
43 of pneumonia between January 1, 2010 and December 31, 2010. All patients were required to have  
44 initially presented to the ED. We defined pneumonia based on both signs and symptoms of infection (ie,  
45 elevated white blood cell count or > 10% band forms, fever or hypothermia). We further required  
46 compatible chest imaging documenting an infiltrate(s). One investigator (MHK), blinded to the clinical  
47 and microbiologic information adjudicated the chest imaging. Identification of *S. pneumoniae* was based  
48 on the results of cultures from either blood, pleural fluid, sputum, or the lower airways. A positive urinary  
49 antigen for *S. pneumoniae* also was used to document infection with this pathogen. The patients  
50  
51  
52  
53  
54  
55  
56  
57  
58  
59  
60

1  
2  
3 described in this report have been previously included in an earlier analysis validating the concept of  
4  
5 HCAP.[3] The Washington University School of Medicine Human Studies Committee approved the  
6  
7 study (# 201205194). As this was a retrospective analysis, there was no requirement for informed  
8  
9 consent.  
10

### 14 **Endpoints and Co-variates**

16 Hospital mortality represented the primary endpoint. We compared persons with pneumococcal  
17  
18 pneumonia initially treated with azithromycin to those not given this agent. During the observation  
19  
20 period, this was the only macrolide available for treatment of pneumonia at the study hospital. There  
21  
22 were no subjects given clarithromycin. Co-variates of interest included patient demographics, severity of  
23  
24 illness, and infection related variables. For demographic factors we noted age, gender, and race. With  
25  
26 respect to co-morbidities, we recorded if the subject was residing in a nursing home or long-term care  
27  
28 facility, was recently hospitalized in the last 90 days, had received antimicrobials in the last 30 days,  
29  
30 suffered from end stage renal disease requiring hemodialysis, or was immunosuppressed. We defined  
31  
32 immunosuppression based on the presence of either acquired-immunodeficiency syndrome (AIDS), active  
33  
34 malignancy undergoing chemotherapy, or treatment with immunosuppressants (ie, 10 mg prednisone or  
35  
36 equivalent daily for at least 30 days or alternate agents such as methotrexate). To assess disease severity  
37  
38 we calculated the CURB-65 score along with recording if there was a need for either ICU care or  
39  
40 mechanical ventilation (MV).[14] With respect to infection-related variables we determined if bacteremia  
41  
42 complicated the pneumonia and the initial antibiotic regimen. We classified the initial antibiotic regimen  
43  
44 as appropriate if a non-macrolide antibiotic that was *in vitro* active against the *S. pneumoniae* isolate was  
45  
46 administered within 4 hours of presentation. [15] At the host institution, antibiotic administration is  
47  
48 protocolized such that all subjects received a non-macrolide anti-infective with activity against  
49  
50 pneumococcus. Therefore, appropriateness of antibiotics was a reflection of the timeliness of  
51  
52 administration. Additionally, by convention, patients given combination treatment including  
53  
54 azithromycin received these drugs concurrently.  
55  
56  
57  
58  
59  
60

## Statistics

We completed univariate analyses with either the Fisher's exact test or Student's t-test as appropriate. Continuous, non-parametrically distributed data was compared via the Mann-Whitney U test. All analyses were two tailed, and a p value of < 0.05 was assumed to represent statistical significance. To determine independent factors associated with mortality, we employed logistic regression. Variables significant at P<0.10 level in univariate analyses were entered into model. We utilized an enter approach for the regression. Co-linearity was explored with correlation matrices. Adjusted odds ratios (AORs) and ninety-five percent confidence intervals (CIs) are reported where appropriate. The model's goodness-of-fit was assessed via calculation of the R<sup>2</sup> value and the Hosmer-Lemeshow c-statistic. All analyses were performed with SPSS 19.0 (SPSS, Chicago, IL).

## RESULTS

During the study period 977 persons were admitted via the ED with evidence of bacterial pneumonia. Of these patients, 187 were infected with *S. pneumoniae*. The mean age of these subjects was 57.0 +/- 8.2 years and approximately half were male. The crude hospital mortality in *S. pneumoniae* pneumonia equaled 11.2% while the mean hospital length of stay measured 8.2 +/- 5.0 days. The most commonly utilized non-azithromycin antibiotics were ceftriaxone (n=111), cefipeme (n= 31), and moxifloxacin (n=22).

Table 1 reveals the differences in baseline characteristics between subjects dying while hospitalized and those surviving to discharge. Those who died were older but there were no other differences in demographics. Patients dying were more severely ill based on all measures used to assess this. Specifically, survivors had lower CURB-65 scores as compared to decedents (median CURB-65 class 4 vs 2, p=0.025). More than a quarter of those dying received MV while fewer than 5% of those discharged alive required MV (p=0.001). The distribution of criteria defining HCAP did not differ between groups. Approximately 11% of all patients resided in nursing homes prior to admission and the

*Azithromycin and Pneumococcal Pneumonia*

1  
2  
3 rate of admission from nursing homes did not correlate with hospital mortality. Immunosuppression was  
4  
5 prevalent in the study population but this also did not differ between those dying and survivors.  
6

7  
8 With respect to infection-related characteristics, the frequency of bacteremia was similar between  
9  
10 the two groups. Compared to those who survived, however, those who died were more likely to have  
11  
12 been given delayed antibiotic therapy (38.1% vs. 9.0%, p=0.001). In all instances, inappropriate therapy  
13  
14 occurred not because of the use of an *in vitro* inactive agent but because of a delay in the initiation of  
15  
16 antibiotics. All isolates were susceptible to the agents actually administered.  
17

18  
19 Hospital mortality rates were significantly lower in persons treated with azithromycin. Of  
20  
21 patients given the macrolide, only 5.4% expired in the hospital as opposed to 23.8% of persons not treated  
22  
23 with such an agent (Figure 1). The odds ratio (OR) for death with a macrolide was 0.20 (94% CI: 0.08-  
24  
25 0.52).  
26

27  
28 In the logistic regression, four variables remained independently associated with mortality (Table  
29  
30 2a). Mortality increased with increasing age (AOR 1.05, 95% CI: 1.01-1.09, p=0.018) and with the need  
31  
32 for MV (AOR 8.82, 95% CI: 2.74-28.46, <0.001). Timely antibiotic therapy resulted in lower in-hospital  
33  
34 death rates (AOR, 0.13, 95% CI: 0.03-0.46, p=0.002). Finally, treatment with azithromycin correlated  
35  
36 with enhanced survival. Azithromycin exposure was independently associated with a reduced risk for  
37  
38 death by nearly 75% (AOR 0.26, 95% CI: 0.08-0.90, p=0.018). Neither being classified as HCAP nor  
39  
40 any of the individual criteria defining HCAP stayed in the final model. The model had excellent fit with  
41  
42 an R<sup>2</sup> value of 0.42 and a C-statistic of 0.991. In a sensitivity analysis (Table 2b) where CURB 65 score  
43  
44 was employed as a marker for severity of illness rather than either need for MV or ICU admission,  
45  
46 treatment with azithromycin remained associated with a lower probability for mortality (AOR 0.34, 95%  
47  
48 CI: 0.11-0.88).  
49  
50  
51  
52  
53  
54  
55  
56  
57  
58  
59  
60

**DISCUSSION**

This retrospective analysis of a cohort of patients with microbiologically confirmed pneumococcal pneumonia indicates that co-administration of azithromycin is associated with significant reductions in short-term mortality. This effect is independent of multiple potential confounders such as severity of illness and the timeliness and activity of initial antimicrobial therapy. The positive impact of azithromycin was also independent of whether bacteremia was present.

Prior efforts evaluating the significance of macrolide therapy on outcomes in CAP have reached conflicting conclusions. Some large case series indicate a survival benefit in persons given macrolides while others have failed to detect such an impact. For example, Martin-Loeches and colleagues observed that macrolide use reduced the risk for mortality in intubated patients with CAP.[10] Tessemmer et al. in a large observational German study also noted that macrolide exposure improved cure rates and short-term mortality.[11] In pneumococcal bacteremia complicating pneumonia, Metersky conclude that macrolide use improved 30 day readmission and mortality rates [15]. On the other hand, Asadi and co-workers reported that mortality rates were similar among 3000 patients treated with either monotherapy with a fluoroquinolone as opposed to a beta-lactam /macrolide combination.[17] Wilson et al additionally determined that inclusion of a macrolide in the antibiotic regimen failed to enhance survival in elderly patients with CAP.[18] Meta-analyses are similarly conflicting in their assessments. One recent meta-analysis including 16 randomized controlled trials (RCTs) evaluating fluoroquinolones against beta-lactam/macrolide combinations calculated that there was no difference in mortality between these regimens.[19] Another group of investigators, though, included both observational reports and RCTs and determined that macrolide administration offered a small but statistically significant mortality benefit.[20]

Our findings add to this debate and are novel in several respects. First, one potential limitation of the above-mentioned studies is that they tend to pool all subjects with CAP, irrespective of culture findings. In contrast, we restricted our evaluation to patients with confirmed *S. pneumoniae* infection whether they had CAP or risk factors for HCAP. Including subjects with either syndrome serves to underscore the need to focus on the pathogen rather than the infectious syndrome. Treatment guidelines

*Azithromycin and Pneumococcal Pneumonia*

1  
2  
3 currently stratify persons in to two cohorts based on their risk factors for infection with resistant  
4 pathogens.[7,12] This scheme ignores the point that pneumococcal infection occurs in both CAP and  
5  
6  
7  
8  
9  
10  
11  
12  
13  
14  
15  
16  
17  
18  
19  
20  
21  
22  
23  
24  
25  
26  
27  
28  
29  
30  
31  
32  
33  
34  
35  
36  
37  
38  
39  
40  
41  
42  
43  
44  
45  
46  
47  
48  
49  
50  
51  
52  
53  
54  
55  
56  
57  
58  
59  
60

currently stratify persons in to two cohorts based on their risk factors for infection with resistant pathogens.[7,12] This scheme ignores the point that pneumococcal infection occurs in both CAP and HCAP. Our results suggest that revision of the guidelines may be appropriate as we noted a mortality benefit with azithromycin even after controlling for factors and co-morbidities which define HCAP.

Furthermore, some of the subjects in earlier reports failed to have either evidence of bacterial infection or were infected with a pathogen other than *S. pneumoniae*. In some instances, only administrative coding data rather than actual culture results facilitated subject identification. This distinction is important in that the immunomodulatory effects of azithromycin have been most clearly elucidated as it relates to infection with *S. pneumoniae*. Although broadly anti-inflammatory in a number of ways, the strongest biologic evidence of a potential means for an impact in pulmonary infection relates to investigations in *S. pneumoniae*. More importantly these effects of macrolides alter both cellular and humoral immunity. *In vitro*, azithromycin, for instance, prevents apoptosis of human polymorphonuclear lymphocytes and may reduce interleukin (IL)-8 production.[21,22] Exposure to azithromycin, furthermore, reduces pneumolysin from both macrolide-susceptible and resistant strains of *S. pneumoniae*. [23] Azithromycin may also reduce production of tumor necrosis alpha and IL-1 alpha in human monocytes and down regulate natural killer cell production with an ensuing alteration in various cytokines.[24] Therefore, by focusing on a specific organism where the nexus with the theoretical mechanisms of immune modulation are better established, our observations help to clarify the discordant findings of others. Our results, in turn, suggest that the benefit of macrolide co-treatment may be restricted to persons with pneumococcal infection

We also specifically controlled for the timeliness of initial therapy. Initially appropriate and timely antibiotic treatment is a key determinant of survival in a number of severe infections ranging from bacteremia to septic shock.[25,26] Many prior studies of macrolides and *S. pneumoniae* pneumonia simply did not address the timing of initial antimicrobial therapy. In most RCTs, adjudicating the coverage and timeliness of initial therapy is clouded by the time window allowed to enroll patients in the specific clinical trial. Some observational reports have failed to explore the importance of this issue in



1  
2  
3 their analytic approaches. Others have simply determined whether an antibiotic regimen was concordant  
4 with formal treatment guidelines was given. This constitutes only a surrogate means for evaluating the  
5 true appropriateness of antimicrobial treatment as it does not examine specific *in vitro* susceptibilities or  
6 the timing of the antibiotic administration. We, however, specifically sought to rectify and address this  
7 limitation by applying specific and clear criteria.  
8  
9  
10  
11  
12

13  
14 Our overall patient outcomes suggest that our data are broadly generalizable. The crude hospital  
15 mortality rate was approximately 10%, as was the prevalence of bacteremia, reflecting what has been  
16 noted in multiple epidemiologic analyses.[1] Likewise, the average LOS in our cohort parallels the  
17 general LOS for this syndrome described in large analyses of US hospital discharge data. The goodness  
18 of fit of our final mortality prediction model was also excellent indicating that there is at most moderate  
19 unmeasured residual confounding. Many earlier analyses of case series data have not described either if  
20 or how well their modeling of outcomes fits their observations.  
21  
22  
23  
24  
25  
26  
27  
28

29 Ray and co-workers have sparked concern regarding macrolides and reported potential  
30 cardiovascular toxicity associated with azithromycin.[13] In a review of Medicaid claims data from  
31 Tennessee, these authors state that deaths due to cardiovascular causes were higher in subjects given  
32 azithromycin as compared to either no antibiotic or amoxicillin. This study has led to calls to re-evaluate  
33 our utilization of azithromycin.[27] The potential for a mortality benefit accruing with use of this drug in  
34 pneumococcal pneumonia should give pause to efforts to reflexively and broadly restrict access to  
35 azithromycin. The burden and prevalence of pneumococcal pneumonia suggest that it would be  
36 inappropriate for policy makers to mix all types of *S. pneumoniae* infection into one group as they make  
37 decisions regarding the availability of this agent. Our results suggest that a measured risk-benefit analysis  
38 is still required at the individual patient level.  
39  
40  
41  
42  
43  
44  
45  
46  
47  
48  
49  
50

51 The present study has several significant limitations. First, its retrospective nature exposes it to  
52 several forms of bias. However, unlike clinical cure, there is little potential for bias in determining at  
53 patient's vital status. Confounding by indication is a similar concern. If such confounding were present,  
54 though, we would expect this to bias our data towards the absence of an impact of azithromycin on  
55  
56  
57  
58  
59  
60

*Azithromycin and Pneumococcal Pneumonia*

1  
2  
3 mortality, while we observed precisely the opposite. Second, the data represent the experience from a  
4 single center and thus may not be indicative of the experience of others. Likewise we only studied  
5 inpatients and so our results do not apply to patients not requiring admission. Third, given the constraints  
6 of modern microbiology and culture techniques there are certainly cases of pneumococcal pneumonia we  
7 missed. Fourth, only 5% of the population required ICU admission. As such, our results most reflect the  
8 experience of less severely ill subjects and the significance of azithromycin in critically ill persons may be  
9 different. These, though, are the patients most often cared for by hospitalists. Fifth we lacked  
10 information on certain co-variables that might have affected mortality, specifically underlying pulmonary  
11 and liver disease. Finally, the sample size precluded us from examining several important variables such  
12 as the exact timing of anti-infective administration (eg, by hour delay from presentation). Sample size  
13 also likely explains why some variables were not significant in our final model. That the CURB-65 score  
14 failed to represent a correlate of mortality in our initial model probably arose because other factors  
15 associated with survival (eg, need for MV) proved more strongly linked with mortality. Likewise, the  
16 vast majority of persons given azithromycin also were given a beta-lactam. As a result, few patients  
17 received either azithromycin alone or with moxifloxacin. Hence, we cannot exclude the possibility that  
18 the benefit with the macrolide is either a surrogate for exposure to a beta-lactam agent or a function of the  
19 combined use of azithromycin with this class of antibiotics.

20  
21  
22  
23  
24  
25  
26  
27  
28  
29  
30  
31  
32  
33  
34  
35  
36  
37  
38  
39  
40  
41  
42  
43  
44  
45  
46  
47  
48  
49  
50  
51  
52  
53  
54  
55  
56  
57  
58  
59  
60

In conclusion, co-administration of azithromycin appears to reduce mortality in persons admitted to the hospital with pneumoniae due to *S. pneumoniae*. This affect persists after adjusting for other important variables known to correlate with survival in this syndrome. Given the safety issues that have arisen with azithromycin along with the possible positive impact of this drug on hospital mortality, a randomized trial exploring the role for adjunctive azithromycin relative to placebo in CAP appears not only warranted but urgently needed.

**ACKNOWLEDGEMENTS, COMPETING INTERESTS, FUNDING**

Dr. Shorr had full access to the data and takes responsibility for the content of the paper including all analyses.

Author contributions

Study concept and design: AFS, MDZ, JH, JK, STM, MHK

Acquisition of data: JH, JK, STM

Analysis and interpretation of data: AFS, MDZ, STM, MHK

Drafting the manuscript: AFS, MDZ, MHK

Critical revision of the manuscript for important intellectual content: AFS, MDZ, JH, JK, STM, MHK

Statistical expertise: AFS, MDZ

Obtained funding: MHK

Study supervision: AFS, MHK

Disclosures: Dr. Shorr has served as a consultant to, speaker for, or received grant support from:

Astellas, Bayer, Cubist, Forrest, Pfizer, Theravance, and Trius. Dr. Zilberberg has served as a consultant to or received grant support from: Astellas, Forrest, J and J, and Pfizer. Dr. Kollef has served as a consultant, speaker for, or received grant support from: Cubist, Hospria, Merck, and Sage Dr. Micek has received grant support from Cubist, Optimer, Merck, and Pfizer. The remaining authors have no potential conflicts.

Funding: This project was supported by the Barnes-Jewish Hospital Foundation.

**REFERENCES**

- 1: Niederman M. In the clinic. Community-acquired pneumonia. *Ann Intern Med* 2009;**151**:ITC4-2-ITC4-14.
- 2: Zilberberg MD, Shorr AF. Healthcare-associated pneumonia: the state of evidence to date. *Curr Opin Pulm Med* 2011;**17**:142-7.
- 3: Shorr AF, Zilberberg MD, Reichley R, Kan J, Hoban A, et al. Validation of a clinical score for assessing the risk of resistant pathogens in patients with pneumonia presenting to the emergency department. *Clin Infect Dis* 2012;**54**:193-8.
- 4: Lexau CA, Lynfield R, Danila R, Pilishvili T, Facklam R, et al. Changing epidemiology of invasive pneumococcal disease among older adults in the era of pediatric pneumococcal conjugate vaccine. *JAMA*. 2005;**294**:2043-51.
- 5: Kollef MH, Shorr A, Tabak YP, et al. Epidemiology and outcomes of health-care-associated pneumonia: results from a large US database of culture-positive pneumonia. *Chest* 2005;**128**:3854-62.
- 6: Schreiber MP, Chan CM, Shorr AF. Resistant pathogens in nonnosocomial pneumonia and respiratory failure: is it time to refine the definition of health-care-associated pneumonia? *Chest* 2010;**137**:1283-8.
- 7: American Thoracic Society; Infectious Diseases Society of America. Guidelines for the management of adults with hospital-acquired, ventilator-associated, and healthcare-associated pneumonia. *Am J Respir Crit Care Med* 2005;**17**:388-416.

1  
2  
3  
4  
5 8: Johansson N, Kalin M, Tiveljung-Lindell A, Giske CG, Hedlund J. Etiology of community-acquired  
6 pneumonia: increased microbiological yield with new diagnostic methods. *Clin Infect Dis*. 2010;**50**:202-  
7  
8

9  
10 9.

11  
12  
13  
14 9: Kovaleva A, Remmelts HH, Rijkers GT, Hoepelman AI, Biesma DH, et al. Immunomodulatory effects  
15 of macrolides during community-acquired pneumonia: a literature review. *J Antimicrob Chemother*.  
16  
17 2012;**67**:530-40.  
18  
19

20  
21  
22  
23 10: Martin-Loeches I, Lisboa T, Rodriguez A, Putensen C, Annane D, et al. Combination antibiotic  
24 therapy with macrolides improves survival in intubated patients with community-acquired pneumonia.  
25  
26 *Intensive Care Med* 2010;**36**:612-20.  
27  
28

29  
30  
31 11: Tessmer A, Welte T, Martus P, Schnoor M, Marre Ret al. Impact of intravenous {beta}-  
32 lactam/macrolide versus {beta}-lactam monotherapy on mortality in hospitalized patients with  
33  
34 community-acquired pneumonia. *J Antimicrob Chemother* 2009;**63**:1025-33.  
35  
36  
37

38  
39  
40 12: Mandell LA, Wunderink RG, Anzueto A, Bartlett JG, Campbell GD, et al. Infectious Diseases  
41 Society of America/American Thoracic Society consensus guidelines on the management of community-  
42  
43 acquired pneumonia in adults. *Clin Infect Dis* 2007;**44** Suppl 2:S27-72.  
44  
45  
46

47  
48  
49 13: Ray WA, Murray KT, Hall K, Arbogast PG, Stein CM. Azithromycin and the risk of cardiovascular  
50  
51 death. *N Engl J Med* 2012;**366**:1881-90.  
52  
53  
54  
55  
56  
57  
58  
59  
60

*Azithromycin and Pneumococcal Pneumonia*

1  
2  
3 14: Lim WS, van der Eerden MM, Laing R, Boersma WG, Karalus N, et al. Defining community  
4 acquired pneumonia severity on presentation to hospital: an international derivation and validation study.  
5  
6 Thorax. 2003;**58**:377-82.  
7  
8

9  
10  
11 15: Metersky ML, Ma A, Houck PM, et al. Antibiotics for bacteremic pneumonia: Improved outcomes  
12 with macrolides but not fluoroquinolones. Chest 2007;**131**:466-73.  
13  
14

15  
16  
17 16: Houck PM, Bratzler DW, Nsa W, Ma A, Bartlett JG. Timing of antibiotic administration and  
18 outcomes for Medicare patients hospitalized with community-acquired pneumonia. Arch Intern Med.  
19 2004;**164**:637-44.  
20  
21  
22

23  
24  
25 17: Asadi L, Eurich DT, Gamble JM, Minhas-Sandhu JK, Marrie TJ, et al. Impact of guideline-  
26 concordant antibiotics and macrolide/ $\beta$ -lactam combinations in 3203 patients hospitalized with  
27 pneumonia: prospective cohort study. Clin Microbiol Infect 2012 Jan 30. doi: 10.1111/j.1469-  
28 0691.2012.03783.x. [Epub ahead of print] PubMed PMID: 22404691.  
29  
30  
31

32  
33  
34 18: Wilson BZ, Anzueto A, Restrepo MI, Pugh MJ, Mortensen EM. Comparison of two guideline-  
35 concordant antimicrobial combinations in elderly patients hospitalized with severe community acquired  
36 pneumonia. Crit Care Med 2012 May 22. [Epub ahead of print] PubMed PMID: 22622401.  
37  
38  
39

40  
41  
42 19: Skalsky K, Yahav D, Lador A, Eliakim-Raz N, Leibovici L, et al. Macrolides vs. quinolones for  
43 community-acquired pneumonia: meta-analysis of randomized controlled trials. Clin Microbiol Infect  
44 2012 Mar 24. doi: 10.1111/j.1469-0691.2012.03838.x. [Epub ahead of print] PubMed PMID: 22489673.  
45  
46  
47  
48  
49  
50  
51  
52  
53  
54  
55  
56  
57  
58  
59  
60

1  
2  
3 20: Asadi L, Sligl WI, Eurich DT, Colmers IN, Tjosvold L, et al. Macrolide-Based Regimens and  
4  
5 Mortality in Hospitalized Patients With Community-Acquired Pneumonia: A Systematic Review and  
6  
7 Meta-analysis. *Clin Infect Dis* 2012 May 31. [Epub ahead of print] PubMed PMID: 22511553.  
8  
9

10  
11  
12 21: Koch CC, Esteban DJ, Chin AC, Olson ME, Read RR, et al. Apoptosis, oxidative metabolism and  
13  
14 interleukin-8 production in human neutrophils exposed to azithromycin: effects of *Streptococcus*  
15  
16 *pneumoniae*. *J Antimicrob Chemother* 2000;**46**:19-26.  
17  
18

19  
20  
21 22: Verleden GM, Vanaudenaerde BM, Dupont LJ, Van Raemdonck DE. Azithromycin reduces airway  
22  
23 neutrophilia and interleukin-8 in patients with bronchiolitis obliterans syndrome. *Am J Respir Crit Care*  
24  
25 *Med* 2006; **174**:566-570.  
26  
27

28  
29  
30 23: Anderson R, Steel HC, Cockeran R, von Gottberg A, de Gouveia L, et al. Comparison of the effects  
31  
32 of macrolides, amoxicillin, ceftriaxone, doxycycline, tobramycin and fluoroquinolones, on the production  
33  
34 of pneumolysin by *Streptococcus pneumoniae* in vitro. *J Antimicrob Chemother* 2007;**60**:1155-8.  
35  
36

37  
38 24: Lin SJ, Yan DC, Lee WI, Kuo ML, Hsiao HS, et al. Effect of azithromycin on natural killer cell  
39  
40 function. *Int Immunopharmacol* 2012;**13**:8-14.  
41  
42

43  
44 25: Kumar A, Ellis P, Arabi Y, Roberts D, Light B, et al. Initiation of inappropriate antimicrobial therapy  
45  
46 results in a fivefold reduction of survival in human septic shock. *Chest* 2009;**136**:1237-48.  
47  
48

49  
50  
51 26: Micek ST, Lloyd AE, Ritchie DJ, Reichley RM, Fraser VJ, et al. *Pseudomonas aeruginosa*  
52  
53 bloodstream infection: importance of appropriate initial antimicrobial treatment. *Antimicrob Agents*  
54  
55 *Chemother.* 2005;**49**:1306-11.  
56  
57  
58  
59  
60

*Azithromycin and Pneumococcal Pneumonia*

1  
2  
3 27: FDA Statement regarding azithromycin (Zithromax) and the risk of cardiovascular death. Available  
4  
5 at <http://www.fda.gov/Drugs/Drugsafety/ucm304372.htm> accessed 12 Jul 2012.  
6  
7  
8  
9  
10  
11  
12  
13  
14  
15  
16  
17  
18  
19  
20  
21  
22  
23  
24  
25  
26  
27  
28  
29  
30  
31  
32  
33  
34  
35  
36  
37  
38  
39  
40  
41  
42  
43  
44  
45  
46  
47  
48  
49  
50  
51  
52  
53  
54  
55  
56  
57  
58  
59  
60

For peer review only



Baseline CharacteristicsTable 1.

|                                 | Hospital Death (n=21) | Hospital Survival<br>(n=166) | p     |
|---------------------------------|-----------------------|------------------------------|-------|
| <i>Demographics</i>             |                       |                              |       |
| -Age, mean±SD, years            | 66.8±18.23            | 55.7±15.0                    | 0.002 |
| -Male, n,%                      | 10, 47.6%             | 84, 50.6%                    | 0.821 |
| <i>-Race</i>                    |                       |                              |       |
| Caucasian, n,%                  | 10, 47.6%             | 87, 52.4%                    | 0.767 |
| African-American, n,%           | 11, 52.4%             | 77, 46.5%                    |       |
| Other, n,%                      | 0, 0. %               | 2, 1.2%                      |       |
| <i>Severity of Illness</i>      |                       |                              |       |
| -CURB 65 Score, median          | 4                     | 2                            | 0.025 |
| <i>-CURB score distribution</i> |                       |                              |       |
| 0, n,%                          | 0, 0%                 | 28, 16.9%                    |       |
| 1, n,%                          | 2, 9.5%               | 51, 30.7%                    |       |
| 2, n,%                          | 0, 0%                 | 28, 16.9%                    |       |
| 3, n,%                          | 6, 28.6%              | 29, 17.5%                    |       |
| 4, n,%                          | 10, 47.6%             | 25, 15.1%                    |       |
| 5 n,%                           | 3, 14.3%              | 5, 3%                        |       |
| -ICU Admission, n,%             | 5, 22.9%              | 6, 3.6%                      | 0.001 |
| -MV, n,%                        | 6, 27.8%              | 8, 4.8%                      | 0.001 |
| <i>Comorbidities</i>            |                       |                              |       |
| -LTC admission, n,%             | 2, 11.1%              | 19, 11.4%                    | 0.999 |

*Azithromycin and Pneumococcal Pneumonia*

|                                              |                  |                   |              |
|----------------------------------------------|------------------|-------------------|--------------|
| -HD, n,%                                     | 0%               | 4, 2.4%           | 0.999        |
| -Immunosuppression, n,%                      | 7, 33.3%         | 38, 22.9%         | 0.289        |
| -Prior antibiotics, n,%                      | 7, 33.3%         | 40, 24.1%         | 0.423        |
| -Recent hospitalization, n,%                 | 3, 14.1%         | 15, 9.0%          | 0.353        |
| <i>Infection-related Characteristics</i>     |                  |                   |              |
| -Bacteremia, n,%                             | 3, 14.1%         | 13, 7.8%          | 0.256        |
| <u>-Delay in appropriate antibiotics, %*</u> | <u>8, 38.1%</u>  | <u>15, 9.0%</u>   | <u>0.001</u> |
| <i>Antibiotic therapy</i>                    |                  |                   |              |
| -Ceftriaxone, n,%                            | 7, 33.3%         | 104, 62.7%        |              |
| -Cefipeme, n,%                               | 8, 38.1%         | 23, 13.9%         |              |
| -Moxifloxacin, n, %                          | 1, 4.8%          | 21, 12.7%         |              |
| -Piperacillin/tazobactam, n, %               | 2, 9.5%          | 8, 4.8%           |              |
| -Other, n, %                                 | 3, 14.3%         | 10, 6.0%          |              |
| <u>-Any beta-lactam/cephalosporin</u>        | <u>17, 81.0%</u> | <u>135, 81.8%</u> | <u>0.999</u> |
| <u>-Azithromycin</u>                         | <u>5, 23.8%</u>  | <u>9, 5.4%</u>    |              |

Abbreviations: HD – hemodialysis; ICU – intensive care unit; LTC – long-term care; MV—Mechanical ventilation.

Variables Associated with Hospital Mortality

Table 2a

|                         | Unadjusted<br>Odds Ratio | Adjusted Odds<br>Ratio (AOR) | 95% Confidence Interval<br>for AOR | P for AOR |
|-------------------------|--------------------------|------------------------------|------------------------------------|-----------|
| -Age, per year          | <u>1.04</u>              | 1.05                         | 1.01-1.09                          | 0.018     |
| -Need for MV            | 8.14                     | 8.82                         | 2.74-28.46                         | 0.001     |
| -Appropriate therapy    | 0.16                     | 0.13                         | 0.03-0.47                          | 0.002     |
| -Use of<br>Azithromycin | 0.20                     | 0.26                         | 0.08-0.80                          | 0.018     |

Abbreviations: MV – mechanical ventilation.

Sensitivity Analysis for Mortality

Table 2b

|                                       | Unadjusted Odds<br>Ratio | Adjusted Odds<br>Ratio (AOR) | 95% Confidence<br>Interval for AOR | P for<br>AOR |
|---------------------------------------|--------------------------|------------------------------|------------------------------------|--------------|
| -Age, per year                        | <u>1.05</u>              | 1.02                         | 0.98-1.05                          | 0.368        |
| -CURB-65 score, per<br>point increase | <u>2.43</u>              | 2.07                         | 1.32-3.25                          | 0.001        |
| -Appropriate therapy                  | 0.16                     | 0.12                         | 0.03-0.42                          | 0.001        |
| -Use of Azithromycin                  | 0.20                     | 0.34                         | 0.11-0.88                          | 0.041        |

Hospital Mortality and Azithromycin Treatment  
Figure 1.

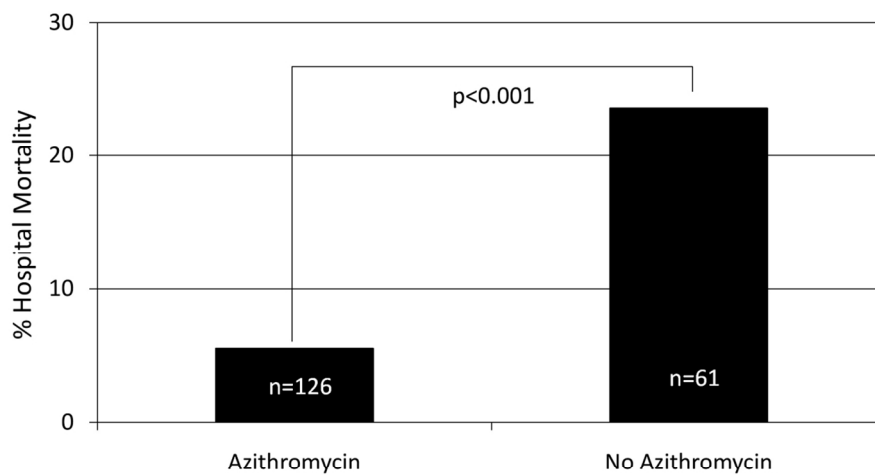

Odds Ratio for Death with Azithromycin: 0.20 (94% CI: 0.08-0.52)

119x90mm (300 x 300 DPI)

Review only

1  
2  
3  
4  
5  
6  
7  
8  
9  
10  
11  
12  
13  
14  
15  
16  
17  
18  
19  
20  
21  
22  
23  
24  
25  
26  
27  
28  
29  
30  
31  
32  
33  
34  
35  
36  
37  
38  
39  
40  
41  
42  
43  
44  
45  
46  
47  
48  
49  
50  
51  
52  
53  
54  
55  
56  
57  
58  
59  
60

**STROBE 2007 (v4) checklist of items to be included in reports of observational studies in epidemiology\***  
**Checklist for cohort, case-control, and cross-sectional studies (combined)**

| Section/Topic             | Item # | Recommendation                                                                                                                                                                                                                                                                                                                                                                                                                                                         | Reported on page # |
|---------------------------|--------|------------------------------------------------------------------------------------------------------------------------------------------------------------------------------------------------------------------------------------------------------------------------------------------------------------------------------------------------------------------------------------------------------------------------------------------------------------------------|--------------------|
| Title and abstract        | 1      | (a) Indicate the study’s design with a commonly used term in the title or the abstract                                                                                                                                                                                                                                                                                                                                                                                 | 1                  |
|                           |        | (b) Provide in the abstract an informative and balanced summary of what was done and what was found                                                                                                                                                                                                                                                                                                                                                                    | 3                  |
| <b>Introduction</b>       |        |                                                                                                                                                                                                                                                                                                                                                                                                                                                                        |                    |
| Background/rationale      | 2      | Explain the scientific background and rationale for the investigation being reported                                                                                                                                                                                                                                                                                                                                                                                   | 4                  |
| Objectives                | 3      | State specific objectives, including any pre-specified hypotheses                                                                                                                                                                                                                                                                                                                                                                                                      | 4-5                |
| <b>Methods</b>            |        |                                                                                                                                                                                                                                                                                                                                                                                                                                                                        |                    |
| Study design              | 4      | Present key elements of study design early in the paper                                                                                                                                                                                                                                                                                                                                                                                                                | 5                  |
| Setting                   | 5      | Describe the setting, locations, and relevant dates, including periods of recruitment, exposure, follow-up, and data collection                                                                                                                                                                                                                                                                                                                                        | 5                  |
| Participants              | 6      | (a) <i>Cohort study</i> —Give the eligibility criteria, and the sources and methods of selection of participants. Describe methods of follow-up<br><i>Case-control study</i> —Give the eligibility criteria, and the sources and methods of case ascertainment and control selection. Give the rationale for the choice of cases and controls<br><i>Cross-sectional study</i> —Give the eligibility criteria, and the sources and methods of selection of participants | 5                  |
|                           |        | (b) <i>Cohort study</i> —For matched studies, give matching criteria and number of exposed and unexposed<br><i>Case-control study</i> —For matched studies, give matching criteria and the number of controls per case                                                                                                                                                                                                                                                 |                    |
| Variables                 | 7      | Clearly define all outcomes, exposures, predictors, potential confounders, and effect modifiers. Give diagnostic criteria, if applicable                                                                                                                                                                                                                                                                                                                               | 5-6                |
| Data sources/ measurement | 8*     | For each variable of interest, give sources of data and details of methods of assessment (measurement). Describe comparability of assessment methods if there is more than one group                                                                                                                                                                                                                                                                                   | 5-6                |
| Bias                      | 9      | Describe any efforts to address potential sources of bias                                                                                                                                                                                                                                                                                                                                                                                                              | 6                  |
| Study size                | 10     | Explain how the study size was arrived at                                                                                                                                                                                                                                                                                                                                                                                                                              | 5                  |
| Quantitative variables    | 11     | Explain how quantitative variables were handled in the analyses. If applicable, describe which groupings were chosen and why                                                                                                                                                                                                                                                                                                                                           | 7                  |
| Statistical methods       | 12     | (a) Describe all statistical methods, including those used to control for confounding                                                                                                                                                                                                                                                                                                                                                                                  | 7                  |
|                           |        | (b) Describe any methods used to examine subgroups and interactions                                                                                                                                                                                                                                                                                                                                                                                                    | NA                 |
|                           |        | (c) Explain how missing data were addressed                                                                                                                                                                                                                                                                                                                                                                                                                            | NA                 |
|                           |        | (d) <i>Cohort study</i> —If applicable, explain how loss to follow-up was addressed<br><i>Case-control study</i> —If applicable, explain how matching of cases and controls was addressed                                                                                                                                                                                                                                                                              | NA                 |

|                          |     |                                                                                                                                                                                                              |          |
|--------------------------|-----|--------------------------------------------------------------------------------------------------------------------------------------------------------------------------------------------------------------|----------|
|                          |     | <i>Cross-sectional study</i> —If applicable, describe analytical methods taking account of sampling strategy                                                                                                 |          |
|                          |     | (e) Describe any sensitivity analyses                                                                                                                                                                        | NA       |
| <b>Results</b>           |     |                                                                                                                                                                                                              |          |
| Participants             | 13* | (a) Report numbers of individuals at each stage of study—eg numbers potentially eligible, examined for eligibility, confirmed eligible, included in the study, completing follow-up, and analysed            | 7        |
|                          |     | (b) Give reasons for non-participation at each stage                                                                                                                                                         | NA       |
|                          |     | (c) Consider use of a flow diagram                                                                                                                                                                           | NA       |
| Descriptive data         | 14* | (a) Give characteristics of study participants (eg demographic, clinical, social) and information on exposures and potential confounders                                                                     | 7, Table |
|                          |     | (b) Indicate number of participants with missing data for each variable of interest                                                                                                                          | NA       |
|                          |     | (c) <i>Cohort study</i> —Summarise follow-up time (eg, average and total amount)                                                                                                                             | NA       |
| Outcome data             | 15* | <i>Cohort study</i> —Report numbers of outcome events or summary measures over time                                                                                                                          | 7-8      |
|                          |     | <i>Case-control study</i> —Report numbers in each exposure category, or summary measures of exposure                                                                                                         |          |
|                          |     | <i>Cross-sectional study</i> —Report numbers of outcome events or summary measures                                                                                                                           |          |
| Main results             | 16  | (a) Give unadjusted estimates and, if applicable, confounder-adjusted estimates and their precision (eg, 95% confidence interval). Make clear which confounders were adjusted for and why they were included | 8-9      |
|                          |     | (b) Report category boundaries when continuous variables were categorized                                                                                                                                    | 8-9      |
|                          |     | (c) If relevant, consider translating estimates of relative risk into absolute risk for a meaningful time period                                                                                             | NA       |
| Other analyses           | 17  | Report other analyses done—eg analyses of subgroups and interactions, and sensitivity analyses                                                                                                               | NA       |
| <b>Discussion</b>        |     |                                                                                                                                                                                                              |          |
| Key results              | 18  | Summarise key results with reference to study objectives                                                                                                                                                     | 9        |
| Limitations              | 19  | Discuss limitations of the study, taking into account sources of potential bias or imprecision. Discuss both direction and magnitude of any potential bias                                                   | 11       |
| Interpretation           | 20  | Give a cautious overall interpretation of results considering objectives, limitations, multiplicity of analyses, results from similar studies, and other relevant evidence                                   | 10-11    |
| Generalisability         | 21  | Discuss the generalisability (external validity) of the study results                                                                                                                                        | 11       |
| <b>Other information</b> |     |                                                                                                                                                                                                              |          |
| Funding                  | 22  | Give the source of funding and the role of the funders for the present study and, if applicable, for the original study on which the present article is based                                                | 13       |

\*Give information separately for cases and controls in case-control studies and, if applicable, for exposed and unexposed groups in cohort and cross-sectional studies.

**Note:** An Explanation and Elaboration article discusses each checklist item and gives methodological background and published examples of transparent reporting. The STROBE checklist is best used in conjunction with this article (freely available on the Web sites of PLoS Medicine at <http://www.plosmedicine.org/>, Annals of Internal Medicine at <http://www.annals.org/>, and Epidemiology at <http://www.epidem.com/>). Information on the STROBE Initiative is available at [www.strobe-statement.org](http://www.strobe-statement.org).

## Azithromycin and Survival In *Streptococcus pneumoniae* Pneumonia: A Retrospective Study

Andrew F. Shorr, MD, MPH,<sup>1</sup> Marya D. Zilberberg, MD, MPH,<sup>2</sup> Jason Kan, BS,<sup>3</sup> Justin Hoffman, BS,<sup>3</sup>  
Scott T. Micek, Pharm D,<sup>3</sup> and Marin H. Kollef, MD<sup>4</sup>

From the

- (1) Pulmonary and Critical Care Medicine Division, Washington Hospital Center, Washington, DC
- (2) EviMed Research Group, LLC, Goshen, MA & University of Massachusetts, Amherst, MA
- (3) Department of Pharmacy Barnes-Jewish Hospital, St. Louis, MO
- (4) Division of Pulmonary and Critical Care Medicine, Washington University School of Medicine, St. Louis, MO

Address all correspondence to:

Andrew F. Shorr, MD, MPH  
Pulmonary and Critical Care Medicine  
Washington Hospital Center  
110 Irving St., NW  
Washington, DC 20010  
Phone: 202-877-7856  
Fax: 202-291-0386  
Email: [afshorr@dnamail.com](mailto:afshorr@dnamail.com)

Word Count: 2480

Running head: Azithromycin and Pneumococcal Pneumonia

Key words: Azithromycin, pneumonia, *S. pneumoniae*, survival

This project was supported by the Barnes-Jewish Hospital Foundation to support data extraction but no extramural support was provided.

**ARTICLE SUMMARY****Article focus**

-To determine the impact of azithromycin co-therapy on outcomes in *Streptococcus pneumoniae* pneumonia

**Key messages**

-Azithromycin co-therapy in pneumonia due to *S. pneumoniae* is associated with improved short-term survival

-This finding is independent of multiple potential confounders including timeliness of antibiotic treatment

**Strengths and limitations of this study**

-Strengths: large sample of pure *S. pneumoniae* pneumonia

-Limitations: Data derive from a single center and the study's retrospective design



**ABSTRACT**

Objective: *S. pneumoniae* (SP) represents a major pathogen in pneumonia. The impact of azithromycin on mortality in SP pneumonia remains unclear. Recent safety concerns regarding azithromycin have raised alarm about this agent's role with pneumonia. We sought to clarify the relationship between survival and azithromycin use in SP pneumonia.

Design: Retrospective cohort.

Setting: Urban, academic hospital.

Participants: Adults with a diagnosis of SP pneumonia (Jan-Dec 2010). The diagnosis of pneumonia required a compatible clinical syndrome and radiographic evidence of an infiltrate.

Intervention: None

Primary and secondary outcome measures: Hospital mortality served as the primary endpoint, and we compared subjects given azithromycin to those not treated with this. Co-variables of interest included demographics, severity of illness, comorbidities, and infection related characteristics (eg, appropriateness of initial treatment, bacteremia). We employed logistic regression to assess the independent impact of azithromycin on hospital mortality.

Results: The cohort included 187 subjects (mean age:  $67.0 \pm 8.2$  years, 50.3% male, 5.9% admitted to the ICU). The most frequently utilized non-macrolide antibiotics included: ceftriaxone (n=111), cefipeme (n=31), and moxifloxacin (n=22). Approximately 2/3rds of the cohort received azithromycin. Crude mortality was lower in persons given azithromycin (5.6% vs. 23.6%,  $p < 0.01$ ). The final survival model included four variables: age, need for mechanical ventilation, initial appropriate therapy, and azithromycin use. The adjusted odds ratio for mortality associated with azithromycin equaled 0.26 (95% confidence interval: 0.08-0.80,  $p = 0.018$ ).

Conclusions: SP pneumonia generally remains associated with substantial mortality while azithromycin treatment is associated with significantly higher survival rates. The impact of azithromycin is independent of multiple potential confounders.

## INTRODUCTION

Pneumonia remains a leading cause of morbidity and mortality. Annually more than 1.3 million patients in the United States (US) present to the hospital with pneumonia and require admission.[1] Direct costs related to pneumonia exceed several billion each year in the US.[1] Because of this burden, multiple efforts have focused on improving the care of patient with pneumonia and attempted to address means for enhancing outcomes in this disease and hospitalists often care for and design hospital pathways for those admitted with pneumonia.

Concurrent with these quality efforts, the microbiology of pneumonia presenting to the hospital has evolved. Over the last decade, pathogens traditionally thought confined to the hospital, such as Methicillin-resistant *Staphylococcus aureus* (MRSA) and *Pseudomonas aeruginosa*, now are implicated in non-nosocomial pneumonia.[2,3] This epidemiologic trend led to the creation of the concept of healthcare-associated pneumonia (HCAP).[2,3] At the same time, rates of pneumonia in adults due to *Streptococcus pneumoniae* have diminished, in part due to the effects of herd immunity arising from the use of the newer vaccines in children.[4] Nonetheless, *S. pneumoniae* remains a leading pathogen in non-nosocomial pneumonia, whether it be CAP or HCAP and whether it results in mild disease or more severe illness necessitating admission to the intensive care unit (ICU).[5,6] Furthermore, current treatment guidelines for HCAP do not suggest consideration of adjunctive macrolide antibiotics, despite the fact that *S. pneumoniae* can still be seen in this syndrome.[3,5,7] While some surveillance studies indicate that *S. pneumoniae* remains the most prevalent pathogen in patients admitted with pneumonia via the ED, other studies suggest that *S. pneumoniae* often represents either the second or third most frequent pathogen in this setting.[5,6,8] Thus, despite it potentially being less prevalent than in prior years, *S. pneumoniae* continues to lead to a disproportionate burden on the healthcare system.

Macrolide antibiotics, particularly azithromycin, are unique as anti-infective agents in that they appear to have potent anti-inflammatory properties.[9] Earlier analyses suggest that azithromycin exposure may confer a mortality advantage in CAP, irrespective of the causative pathogen.[10,11] This

1  
2  
3 observation has resulted in treatment guidelines recommending utilization of macrolides in CAP and their  
4 continuation even if the patient is concurrently being treated with another in vitro active antimicrobial as  
5 one potential approach.[12] Many of the reports supporting a survival benefit related to macrolide use in  
6 CAP, though, have been limited because they either were conducted in an era before HCAP became a  
7 concern or because they often did not account for issues related to rates of initially appropriate  
8 antimicrobial administration. These reports have also explored CAP as a syndrome, regardless of the  
9 pathogen, and not specifically addressed *S. pneumoniae*. Recent descriptions of potential cardiovascular  
10 toxicities arising with azithromycin reinforce the need to elucidate if this agent alters mortality.[13] A  
11 potential survival benefit related to azithromycin in *S. pneumoniae* pneumonia would indicate that the  
12 risk/benefit calculus favors utilization of this agent notwithstanding concerns about rhythm disturbances.  
13  
14  
15  
16  
17  
18  
19  
20  
21  
22  
23

24  
25 We hypothesized that co-treatment with azithromycin would improve mortality in pneumonia due  
26 to *S. pneumoniae* and that this effect would be independent of confounding arising from failure to  
27 administer appropriate initial antibiotic therapy. To explore our hypothesis, we conducted a retrospective  
28 analysis of all subjects with either CAP or HCAP admitted with evidence of infection related to *S.*  
29  
30  
31  
32  
33  
34  
35  
36  
37  
38  
39  
40  
41  
42  
43  
44  
45  
46  
47  
48  
49  
50  
51  
52  
53  
54  
55  
56  
57  
58  
59  
60

## METHODS

### Study Overview and Subjects

We retrospectively identified all adult (age > 18 years) patients admitted with a clinical diagnosis of pneumonia between January 1, 2010 and December 31, 2010. All patients were required to have initially presented to the ED. We defined pneumonia based on both signs and symptoms of infection (ie, elevated white blood cell count or > 10% band forms, fever or hypothermia). We further required compatible chest imaging documenting an infiltrate(s). One investigator (MHK), blinded to the clinical and microbiologic information adjudicated the chest imaging. Identification of *S. pneumoniae* was based on the results of cultures from either blood, pleural fluid, sputum, or the lower airways. A positive urinary antigen for *S. pneumoniae* also was used to document infection with this pathogen. The patients

1  
2  
3 described in this report have been previously included in an earlier analysis validating the concept of  
4 HCAP.[3] The Washington University School of Medicine Human Studies Committee approved the  
5 study (# 201205194). As this was a retrospective analysis, there was no requirement for informed  
6  
7  
8  
9  
10 consent.

### 14 **Endpoints and Co-variates**

16 Hospital mortality represented the primary endpoint. We compared persons with pneumococcal  
17 pneumonia initially treated with azithromycin to those not given this agent. During the observation  
18 period, this was the only macrolide available for treatment of pneumonia at the study hospital. There  
19 were no subjects given clarithromycin. Co-variates of interest included patient demographics, severity of  
20 illness, and infection related variables. For demographic factors we noted age, gender, and race. With  
21 respect to co-morbidities, we recorded if the subject was residing in a nursing home or long-term care  
22 facility, was recently hospitalized in the last 90 days, had received antimicrobials in the last 30 days,  
23 suffered from end stage renal disease requiring hemodialysis, or was immunosuppressed. We defined  
24 immunosuppression based on the presence of either acquired-immunodeficiency syndrome (AIDS), active  
25 malignancy undergoing chemotherapy, or treatment with immunosuppressants (ie, 10 mg prednisone or  
26 equivalent daily for at least 30 days or alternate agents such as methotrexate). To assess disease severity  
27 we calculated the CURB-65 score along with recording if there was a need for either ICU care or  
28 mechanical ventilation (MV).[14] With respect to infection-related variables we determined if bacteremia  
29 complicated the pneumonia and the initial antibiotic regimen. We classified the initial antibiotic regimen  
30 as appropriate if a non-macrolide antibiotic that was *in vitro* active against the *S. pneumoniae* isolate was  
31 administered within 4 hours of presentation. [15] At the host institution, antibiotic administration is  
32 protocolized such that all subjects received a non-macrolide anti-infective with activity against  
33 pneumococcus. Therefore, appropriateness of antibiotics was a reflection of the timeliness of  
34 administration. Additionally, by convention, patients given combination treatment including  
35 azithromycin received these drugs concurrently.

## Statistics

We completed univariate analyses with either the Fisher's exact test or Student's t-test as appropriate. Continuous, non-parametrically distributed data was compared via the Mann-Whitney U test. All analyses were two tailed, and a p value of < 0.05 was assumed to represent statistical significance. To determine independent factors associated with mortality, we employed logistic regression. Variables significant at P<0.10 level in univariate analyses were entered into model. We utilized an enter approach for the regression. Co-linearity was explored with correlation matrices. Adjusted odds ratios (AORs) and ninety-five percent confidence intervals (CIs) are reported where appropriate. The model's goodness-of-fit was assessed via calculation of the R<sup>2</sup> value and the Hosmer-Lemeshow c-statistic. All analyses were performed with SPSS 19.0 (SPSS, Chicago, IL).

## RESULTS

During the study period 977 persons were admitted via the ED with evidence of bacterial pneumonia. Of these patients, 187 were infected with *S. pneumoniae*. The mean age of these subjects was 57.0 +/- 8.2 years and approximately half were male. The crude hospital mortality in *S. pneumoniae* pneumonia equaled 11.2% while the mean hospital length of stay measured 8.2 +/- 5.0 days. The most commonly utilized non-azithromycin antibiotics were ceftriaxone (n=111), cefipeme (n= 31), and moxifloxacin (n=22).

Table 1 reveals the differences in baseline characteristics between subjects dying while hospitalized and those surviving to discharge. Those who died were older but there were no other differences in demographics. Patients dying were more severely ill based on all measures used to assess this. Specifically, survivors had lower CURB-65 scores as compared to decedents (median CURB-65 class 4 vs 2, p=0.025). More than a quarter of those dying received MV while fewer than 5% of those discharged alive required MV (p=0.001). The distribution of criteria defining HCAP did not differ between groups. Approximately 11% of all patients resided in nursing homes prior to admission and the

*Azithromycin and Pneumococcal Pneumonia*

1  
2  
3 rate of admission from nursing homes did not correlate with hospital mortality. Immunosuppression was  
4  
5 prevalent in the study population but this also did not differ between those dying and survivors.  
6

7  
8 With respect to infection-related characteristics, the frequency of bacteremia was similar between  
9  
10 the two groups. Compared to those who survived, however, those who died were more likely to have  
11  
12 been given delayed antibiotic therapy (38.1% vs. 9.0%, 61.9% vs. 91.0%; p=0.001). In all instances,  
13  
14 inappropriate therapy occurred not because of the use of an *in vitro* inactive agent but because of a delay  
15  
16 in the initiation of antibiotics. All isolates were susceptible to the agents actually administered.  
17

18  
19 Hospital mortality rates were significantly lower in persons treated with azithromycin. Of  
20  
21 patients given the macrolide, only 5.4% expired in the hospital as opposed to 23.8% of persons not treated  
22  
23 with such an agent (Figure 1). The odds ratio (OR) for death with a macrolide was 0.20 (94% CI: 0.08-  
24  
25 0.52).  
26

27  
28 In the logistic regression, four variables remained independently associated with mortality (Table  
29  
30 2a). Mortality increased with increasing age (AOR 1.05, 95% CI: 1.01-1.09, p=0.018) and with the need  
31  
32 for MV (AOR 8.82, 95% CI: 2.74-28.46, <0.001). Timely antibiotic therapy resulted in lower in-hospital  
33  
34 death rates (AOR, 0.13, 95% CI: 0.03-0.46, p=0.002). Finally, treatment with azithromycin correlated  
35  
36 with enhanced survival. Azithromycin exposure was independently associated with a reduced risk for  
37  
38 death by nearly 75% (AOR 0.26, 95% CI: 0.08-0.90, p=0.018). Neither being classified as HCAP nor  
39  
40 any of the individual criteria defining HCAP stayed in the final model. The model had excellent fit with  
41  
42 an R<sup>2</sup> value of 0.42 and a C-statistic of 0.991. In a sensitivity analysis (Table 2b) where CURB 65 score  
43  
44 was employed as a marker for severity of illness rather than either need for MV or ICU admission,  
45  
46 treatment with azithromycin remained associated with a lower probability for mortality (AOR 0.34, 95%  
47  
48 CI: 0.11-0.88).  
49  
50  
51  
52  
53  
54  
55  
56  
57  
58  
59  
60

**DISCUSSION**

This retrospective analysis of a cohort of patients with microbiologically confirmed pneumococcal pneumonia indicates that co-administration of azithromycin is associated with significant reductions in short-term mortality. This effect is independent of multiple potential confounders such as severity of illness and the timeliness and activity of initial antimicrobial therapy. The positive impact of azithromycin was also independent of whether bacteremia was present.

Prior efforts evaluating the significance of macrolide therapy on outcomes in CAP have reached conflicting conclusions. Some large case series indicate a survival benefit in persons given macrolides while others have failed to detect such an impact. For example, Martin-Loeches and colleagues observed that macrolide use reduced the risk for mortality in intubated patients with CAP.[10] Tessemmer et al. in a large observational German study also noted that macrolide exposure improved cure rates and short-term mortality.[11] In pneumococcal bacteremia complicating pneumonia, Metersky conclude that macrolide use improved 30 day readmission and mortality rates [15]. On the other hand, Asadi and co-workers reported that mortality rates were similar among 3000 patients treated with either monotherapy with a fluoroquinolone as opposed to a beta-lactam /macrolide combination.[17] Wilson et al additionally determined that inclusion of a macrolide in the antibiotic regimen failed to enhance survival in elderly patients with CAP.[18] Meta-analyses are similarly conflicting in their assessments. One recent meta-analysis including 16 randomized controlled trials (RCTs) evaluating fluoroquinolones against beta-lactam/macrolide combinations calculated that there was no difference in mortality between these regimens.[19] Another group of investigators, though, included both observational reports and RCTs and determined that macrolide administration offered a small but statistically significant mortality benefit.[20]

Our findings add to this debate and are novel in several respects. First, one potential limitation of the above-mentioned studies is that they tend to pool all subjects with CAP, irrespective of culture findings. In contrast, we restricted our evaluation to patients with confirmed *S. pneumoniae* infection whether they had CAP or risk factors for HCAP. Including subjects with either syndrome serves to underscore the need to focus on the pathogen rather than the infectious syndrome. Treatment guidelines

*Azithromycin and Pneumococcal Pneumonia*

1  
2  
3 currently stratify persons in to two cohorts based on their risk factors for infection with resistant  
4 pathogens.[7,12] This scheme ignores the point that pneumococcal infection occurs in both CAP and  
5  
6  
7  
8  
9  
10  
11  
12  
13  
14  
15  
16  
17  
18  
19  
20  
21  
22  
23  
24  
25  
26  
27  
28  
29  
30  
31  
32  
33  
34  
35  
36  
37  
38  
39  
40  
41  
42  
43  
44  
45  
46  
47  
48  
49  
50  
51  
52  
53  
54  
55  
56  
57  
58  
59  
60

currently stratify persons in to two cohorts based on their risk factors for infection with resistant pathogens.[7,12] This scheme ignores the point that pneumococcal infection occurs in both CAP and HCAP. Our results suggest that revision of the guidelines may be appropriate as we noted a mortality benefit with azithromycin even after controlling for factors and co-morbidities which define HCAP.

Furthermore, some of the subjects in earlier reports failed to have either evidence of bacterial infection or were infected with a pathogen other than *S. pneumoniae*. In some instances, only administrative coding data rather than actual culture results facilitated subject identification. This distinction is important in that the immunomodulatory effects of azithromycin have been most clearly elucidated as it relates to infection with *S. pneumoniae*. Although broadly anti-inflammatory in a number of ways, the strongest biologic evidence of a potential means for an impact in pulmonary infection relates to investigations in *S. pneumoniae*. More importantly these effects of macrolides alter both cellular and humoral immunity. *In vitro*, azithromycin, for instance, prevents apoptosis of human polymorphonuclear lymphocytes and may reduce interleukin (IL)-8 production.[21,22] Exposure to azithromycin, furthermore, reduces pneumolysin from both macrolide-susceptible and resistant strains of *S. pneumoniae*. [23] Azithromycin may also reduce production of tumor necrosis alpha and IL-1 alpha in human monocytes and down regulate natural killer cell production with an ensuing alteration in various cytokines.[24] Therefore, by focusing on a specific organism where the nexus with the theoretical mechanisms of immune modulation are better established, our observations help to clarify the discordant findings of others. Our results, in turn, suggest that the benefit of macrolide co-treatment may be restricted to persons with pneumococcal infection

We also specifically controlled for the timeliness of initial therapy. Initially appropriate and timely antibiotic treatment is a key determinant of survival in a number of severe infections ranging from bacteremia to septic shock.[25,26] Many prior studies of macrolides and *S. pneumoniae* pneumonia simply did not address the timing of initial antimicrobial therapy. In most RCTs, adjudicating the coverage and timeliness of initial therapy is clouded by the time window allowed to enroll patients in the specific clinical trial. Some observational reports have failed to explore the importance of this issue in



1  
2  
3 their analytic approaches. Others have simply determined whether an antibiotic regimen was concordant  
4 with formal treatment guidelines was given. This constitutes only a surrogate means for evaluating the  
5 true appropriateness of antimicrobial treatment as it does not examine specific *in vitro* susceptibilities or  
6 the timing of the antibiotic administration. We, however, specifically sought to rectify and address this  
7 limitation by applying specific and clear criteria.  
8  
9

10  
11  
12 Our overall patient outcomes suggest that our data are broadly generalizable. The crude hospital  
13 mortality rate was approximately 10%, as was the prevalence of bacteremia, reflecting what has been  
14 noted in multiple epidemiologic analyses.[1] Likewise, the average LOS in our cohort parallels the  
15 general LOS for this syndrome described in large analyses of US hospital discharge data. The goodness  
16 of fit of our final mortality prediction model was also excellent indicating that there is at most moderate  
17 unmeasured residual confounding. Many earlier analyses of case series data have not described either if  
18 or how well their modeling of outcomes fits their observations.  
19  
20  
21  
22  
23  
24  
25  
26  
27  
28

29  
30 Ray and co-workers have sparked concern regarding macrolides and reported potential  
31 cardiovascular toxicity associated with azithromycin.[13] In a review of Medicaid claims data from  
32 Tennessee, these authors state that deaths due to cardiovascular causes were higher in subjects given  
33 azithromycin as compared to either no antibiotic or amoxicillin. This study has led to calls to re-evaluate  
34 our utilization of azithromycin.[27] The potential for a mortality benefit accruing with use of this drug in  
35 pneumococcal pneumonia should give pause to efforts to reflexively and broadly restrict access to  
36 azithromycin. The burden and prevalence of pneumococcal pneumonia suggest that it would be  
37 inappropriate for policy makers to mix all types of *S. pneumoniae* infection into one group as they make  
38 decisions regarding the availability of this agent. Our results suggest that a measured risk-benefit analysis  
39 is still required at the individual patient level.  
40  
41  
42  
43  
44  
45  
46  
47  
48  
49  
50

51 The present study has several significant limitations. First, its retrospective nature exposes it to  
52 several forms of bias. However, unlike clinical cure, there is little potential for bias in determining at  
53 patient's vital status. Confounding by indication is a similar concern. If such confounding were present,  
54 though, we would expect this to bias our data towards the absence of an impact of azithromycin on  
55  
56  
57  
58  
59  
60

*Azithromycin and Pneumococcal Pneumonia*

1  
2  
3 mortality, while we observed precisely the opposite. Second, the data represent the experience from a  
4 single center and thus may not be indicative of the experience of others. Likewise we only studied  
5 inpatients and so our results do not apply to patients not requiring admission. Third, given the constraints  
6 of modern microbiology and culture techniques there are certainly cases of pneumococcal pneumonia we  
7 missed. Fourth, only 5% of the population required ICU admission. As such, our results most reflect the  
8 experience of less severely ill subjects and the significance of azithromycin in critically ill persons may be  
9 different. These, though, are the patients most often cared for by hospitalists. Fifth we lacked  
10 information on certain co-variables that might have affected mortality, specifically underlying pulmonary  
11 and liver disease. Finally, the sample size precluded us from examining several important variables such  
12 as the exact timing of anti-infective administration (eg, by hour delay from presentation). Sample size  
13 also likely explains why some variables were not significant in our final model. That the CURB-65 score  
14 failed to represent a correlate of mortality in our initial model probably arose because other factors  
15 associated with survival (eg, need for MV) proved more strongly linked with mortality. Likewise, the  
16 vast majority of persons given azithromycin also were given a beta-lactam. As a result, few patients  
17 received either azithromycin alone or with moxifloxacin. Hence, we cannot exclude the possibility that  
18 the benefit with the macrolide is either a surrogate for exposure to a beta-lactam agent or a function of the  
19 combined use of azithromycin with this class of antibiotics.

20  
21  
22  
23  
24  
25  
26  
27  
28  
29  
30  
31  
32  
33  
34  
35  
36  
37  
38  
39  
40 In conclusion, co-administration of azithromycin appears to reduce mortality in persons admitted  
41 to the hospital with pneumoniae due to *S. pneumoniae*. This affect persists after adjusting for other  
42 important variables known to correlate with survival in this syndrome. Given the safety issues that have  
43 arisen with azithromycin along with the possible positive impact of this drug on hospital mortality, a  
44 randomized trial exploring the role for adjunctive azithromycin relative to placebo in CAP appears not  
45 only warranted but urgently needed.  
46  
47  
48  
49  
50  
51  
52  
53  
54  
55  
56  
57  
58  
59  
60

**ACKNOWLEDGEMENTS, COMPETING INTERESTS, FUNDING**

Dr. Shorr had full access to the data and takes responsibility for the content of the paper including all analyses.

Author contributions

Study concept and design: AFS, MDZ, JH, JK, STM, MHK

Acquisition of data: JH, JK, STM

Analysis and interpretation of data: AFS, MDZ, STM, MHK

Drafting the manuscript: AFS, MDZ, MHK

Critical revision of the manuscript for important intellectual content: AFS, MDZ, JH, JK, STM, MHK

Statistical expertise: AFS, MDZ

Obtained funding: MHK

Study supervision: AFS, MHK

Disclosures: Dr. Shorr has served as a consultant to, speaker for, or received grant support from:

Astellas, Bayer, Cubist, Forrest, Pfizer, Theravance, and Trius. Dr. Zilberberg has served as a consultant to or received grant support from: Astellas, Forrest, J and J, and Pfizer. Dr. Kollef has served as a consultant, speaker for, or received grant support from: Cubist, Hospria, Merck, and Sage Dr. Micek has received grant support from Cubist, Optimer, Merck, and Pfizer. The remaining authors have no potential conflicts.

Funding: This project was supported by the Barnes-Jewish Hospital Foundation.

**REFERENCES**

1  
2  
3  
4  
5  
6  
7  
8  
9  
10  
11  
12  
13  
14  
15  
16  
17  
18  
19  
20  
21  
22  
23  
24  
25  
26  
27  
28  
29  
30  
31  
32  
33  
34  
35  
36  
37  
38  
39  
40  
41  
42  
43  
44  
45  
46  
47  
48  
49  
50  
51  
52  
53  
54  
55  
56  
57  
58  
59  
60

1: Niederman M. In the clinic. Community-acquired pneumonia. *Ann Intern Med* 2009;**151**:ITC4-2-ITC4-14.

2: Zilberberg MD, Shorr AF. Healthcare-associated pneumonia: the state of evidence to date. *Curr Opin Pulm Med* 2011;**17**:142-7.

3: Shorr AF, Zilberberg MD, Reichley R, Kan J, Hoban A, et al. Validation of a clinical score for assessing the risk of resistant pathogens in patients with pneumonia presenting to the emergency department. *Clin Infect Dis* 2012;**54**:193-8.

4: Lexau CA, Lynfield R, Danila R, Pilishvili T, Facklam R, et al. Changing epidemiology of invasive pneumococcal disease among older adults in the era of pediatric pneumococcal conjugate vaccine. *JAMA*. 2005;**294**:2043-51.

5: Kollef MH, Shorr A, Tabak YP, et al. Epidemiology and outcomes of health-care-associated pneumonia: results from a large US database of culture-positive pneumonia. *Chest* 2005;**128**:3854-62.

6: Schreiber MP, Chan CM, Shorr AF. Resistant pathogens in nonnosocomial pneumonia and respiratory failure: is it time to refine the definition of health-care-associated pneumonia? *Chest* 2010;**137**:1283-8.

7: American Thoracic Society; Infectious Diseases Society of America. Guidelines for the management of adults with hospital-acquired, ventilator-associated, and healthcare-associated pneumonia. *Am J Respir Crit Care Med* 2005;**17**:388-416.

1  
2  
3  
4  
5 8: Johansson N, Kalin M, Tiveljung-Lindell A, Giske CG, Hedlund J. Etiology of community-acquired  
6 pneumonia: increased microbiological yield with new diagnostic methods. *Clin Infect Dis*. 2010;**50**:202-  
7  
8

9  
10 9.

11  
12  
13  
14 9: Kovaleva A, Remmelts HH, Rijkers GT, Hoepelman AI, Biesma DH, et al. Immunomodulatory effects  
15 of macrolides during community-acquired pneumonia: a literature review. *J Antimicrob Chemother*.  
16  
17 2012;**67**:530-40.  
18  
19

20  
21  
22  
23 10: Martin-Loeches I, Lisboa T, Rodriguez A, Putensen C, Annane D, et al. Combination antibiotic  
24 therapy with macrolides improves survival in intubated patients with community-acquired pneumonia.  
25  
26 *Intensive Care Med* 2010;**36**:612-20.  
27  
28

29  
30  
31 11: Tessmer A, Welte T, Martus P, Schnoor M, Marre Ret al. Impact of intravenous {beta}-  
32 lactam/macrolide versus {beta}-lactam monotherapy on mortality in hospitalized patients with  
33  
34 community-acquired pneumonia. *J Antimicrob Chemother* 2009;**63**:1025-33.  
35  
36  
37

38  
39  
40 12: Mandell LA, Wunderink RG, Anzueto A, Bartlett JG, Campbell GD, et al. Infectious Diseases  
41 Society of America/American Thoracic Society consensus guidelines on the management of community-  
42  
43 acquired pneumonia in adults. *Clin Infect Dis* 2007;**44** Suppl 2:S27-72.  
44  
45  
46

47  
48  
49 13: Ray WA, Murray KT, Hall K, Arbogast PG, Stein CM. Azithromycin and the risk of cardiovascular  
50  
51 death. *N Engl J Med* 2012;**366**:1881-90.  
52  
53  
54  
55  
56  
57  
58  
59  
60

*Azithromycin and Pneumococcal Pneumonia*

1  
2  
3 14: Lim WS, van der Eerden MM, Laing R, Boersma WG, Karalus N, et al. Defining community  
4 acquired pneumonia severity on presentation to hospital: an international derivation and validation study.  
5  
6 Thorax. 2003;**58**:377-82.  
7  
8

9  
10  
11 15: Metersky ML, Ma A, Houck PM, et al. Antibiotics for bacteremic pneumonia: Improved outcomes  
12 with macrolides but not fluoroquinolones. Chest 2007;**131**:466-73.  
13  
14

15  
16  
17 16: Houck PM, Bratzler DW, Nsa W, Ma A, Bartlett JG. Timing of antibiotic administration and  
18 outcomes for Medicare patients hospitalized with community-acquired pneumonia. Arch Intern Med.  
19  
20 2004;**164**:637-44.  
21  
22

23  
24  
25 17: Asadi L, Eurich DT, Gamble JM, Minhas-Sandhu JK, Marrie TJ, et al. Impact of guideline-  
26 concordant antibiotics and macrolide/ $\beta$ -lactam combinations in 3203 patients hospitalized with  
27 pneumonia: prospective cohort study. Clin Microbiol Infect 2012 Jan 30. doi: 10.1111/j.1469-  
28  
29 0691.2012.03783.x. [Epub ahead of print] PubMed PMID: 22404691.  
30  
31  
32

33  
34  
35 18: Wilson BZ, Anzueto A, Restrepo MI, Pugh MJ, Mortensen EM. Comparison of two guideline-  
36 concordant antimicrobial combinations in elderly patients hospitalized with severe community acquired  
37 pneumonia. Crit Care Med 2012 May 22. [Epub ahead of print] PubMed PMID: 22622401.  
38  
39  
40

41  
42  
43 19: Skalsky K, Yahav D, Lador A, Eliakim-Raz N, Leibovici L, et al. Macrolides vs. quinolones for  
44 community-acquired pneumonia: meta-analysis of randomized controlled trials. Clin Microbiol Infect  
45  
46 2012 Mar 24. doi: 10.1111/j.1469-0691.2012.03838.x. [Epub ahead of print] PubMed PMID: 22489673.  
47  
48  
49  
50  
51  
52  
53  
54  
55  
56  
57  
58  
59  
60

1  
2  
3 20: Asadi L, Sligl WI, Eurich DT, Colmers IN, Tjosvold L, et al. Macrolide-Based Regimens and  
4  
5 Mortality in Hospitalized Patients With Community-Acquired Pneumonia: A Systematic Review and  
6  
7 Meta-analysis. *Clin Infect Dis* 2012 May 31. [Epub ahead of print] PubMed PMID: 22511553.  
8  
9

10  
11 21: Koch CC, Esteban DJ, Chin AC, Olson ME, Read RR, et al. Apoptosis, oxidative metabolism and  
12  
13 interleukin-8 production in human neutrophils exposed to azithromycin: effects of *Streptococcus*  
14  
15 *pneumoniae*. *J Antimicrob Chemother* 2000;**46**:19-26.  
16  
17

18  
19 22: Verleden GM, Vanaudenaerde BM, Dupont LJ, Van Raemdonck DE. Azithromycin reduces airway  
20  
21 neutrophilia and interleukin-8 in patients with bronchiolitis obliterans syndrome. *Am J Respir Crit Care*  
22  
23 *Med* 2006; **174**:566-570.  
24  
25  
26

27  
28 23: Anderson R, Steel HC, Cockeran R, von Gottberg A, de Gouveia L, et al. Comparison of the effects  
29  
30 of macrolides, amoxicillin, ceftriaxone, doxycycline, tobramycin and fluoroquinolones, on the production  
31  
32 of pneumolysin by *Streptococcus pneumoniae* in vitro. *J Antimicrob Chemother* 2007;**60**:1155-8.  
33  
34  
35

36  
37 24: Lin SJ, Yan DC, Lee WI, Kuo ML, Hsiao HS, et al. Effect of azithromycin on natural killer cell  
38  
39 function. *Int Immunopharmacol* 2012;**13**:8-14.  
40  
41  
42

43  
44 25: Kumar A, Ellis P, Arabi Y, Roberts D, Light B, et al. Initiation of inappropriate antimicrobial therapy  
45  
46 results in a fivefold reduction of survival in human septic shock. *Chest* 2009;**136**:1237-48.  
47  
48  
49

50  
51 26: Micek ST, Lloyd AE, Ritchie DJ, Reichley RM, Fraser VJ, et al. *Pseudomonas aeruginosa*  
52  
53 bloodstream infection: importance of appropriate initial antimicrobial treatment. *Antimicrob Agents*  
54  
55 *Chemother.* 2005;**49**:1306-11.  
56  
57  
58  
59  
60

*Azithromycin and Pneumococcal Pneumonia*

1  
2  
3 27: FDA Statement regarding azithromycin (Zithromax) and the risk of cardiovascular death. Available  
4 at <http://www.fda.gov/Drugs/Drugsafety/ucm304372.htm> accessed 12 Jul 2012.  
5  
6  
7  
8  
9  
10  
11  
12  
13  
14  
15  
16  
17  
18  
19  
20  
21  
22  
23  
24  
25  
26  
27  
28  
29  
30  
31  
32  
33  
34  
35  
36  
37  
38  
39  
40  
41  
42  
43  
44  
45  
46  
47  
48  
49  
50  
51  
52  
53  
54  
55  
56  
57  
58  
59  
60

For peer review only



Baseline CharacteristicsTable 1.

|                                 | Hospital Death (n=21) | Hospital Survival<br>(n=166) | p     |
|---------------------------------|-----------------------|------------------------------|-------|
| <i>Demographics</i>             |                       |                              |       |
| -Age, mean±SD, years            | 66.8±18.23            | 55.7±15.0                    | 0.002 |
| -Male, n,%                      | 10, 47.6%             | 84, 50.6%                    | 0.821 |
| <i>-Race</i>                    |                       |                              |       |
| Caucasian, n,%                  | 10, 47.6%             | 87, 52.4%                    | 0.767 |
| African-American, n,%           | 11, 52.4%             | 77, 46.5%                    |       |
| Other, n,%                      | 0, 0. %               | 2, 1.2%                      |       |
| <i>Severity of Illness</i>      |                       |                              |       |
| -CURB 65 Score, median          | 4                     | 2                            | 0.025 |
| <i>-CURB score distribution</i> |                       |                              |       |
| 0, n,%                          | 0, 0%                 | 28, 16.9%                    |       |
| 1, n,%                          | 2, 9.5%               | 51, 30.7%                    |       |
| 2, n,%                          | 0, 0%                 | 28, 16.9%                    |       |
| 3, n,%                          | 6, 28.6%              | 29, 17.5%                    |       |
| 4, n,%                          | 10, 47.6%             | 25, 15.1%                    |       |
| 5 n,%                           | 3, 14.3%              | 5, 3%                        |       |
| -ICU Admission, n,%             | 5, 22.9%              | 6, 3.6%                      | 0.001 |
| -MV, n,%                        | 6, 27.8%              | 8, 4.8%                      | 0.001 |
| <i>Comorbidities</i>            |                       |                              |       |
| -LTC admission, n,%             | 2, 11.1%              | 19, 11.4%                    | 0.999 |

*Azithromycin and Pneumococcal Pneumonia*

|                                          |                  |                   |              |
|------------------------------------------|------------------|-------------------|--------------|
| -HD, n,%                                 | 0%               | 4, 2.4%           | 0.999        |
| -Immunosuppression, n,%                  | 7, 33.3%         | 38, 22.9%         | 0.289        |
| -Prior antibiotics, n,%                  | 7, 33.3%         | 40, 24.1%         | 0.423        |
| -Recent hospitalization, n,%             | 3, 14.1%         | 15, 9.0%          | 0.353        |
| <i>Infection-related Characteristics</i> |                  |                   |              |
| -Bacteremia, n,%                         | 3, 14.1%         | 13, 7.8%          | 0.256        |
| -Delay in appropriate antibiotics, %*    | <u>8, 38.1%</u>  | <u>15, 9.0%</u>   | 0.001        |
| <i>Antibiotic therapy</i>                |                  |                   |              |
| -Ceftriaxone, n,%                        | 7, 33.3%         | 104, 62.7%        |              |
| -Cefipeme, n,%                           | 8, 38.1%         | 23, 13.9%         |              |
| -Moxifloxacin, n, %                      | 1, 4.8%          | 21, 12.7%         |              |
| -Piperacillin/tazobactam, n, %           | 2, 9.5%          | 8, 4.8%           |              |
| -Other, n, %                             | 3, 14.3%         | 10, 6.0%          |              |
| <u>-Any beta-lactam/cephalosporin</u>    | <u>17, 81.0%</u> | <u>135, 81.8%</u> | <u>0.999</u> |
| <u>-Azithromycin</u>                     | <u>5, 23.8%</u>  | <u>9, 5.4%</u>    |              |

Abbreviations: HD – hemodialysis; ICU – intensive care unit; LTC – long-term care; MV—Mechanical ventilation.

Variables Associated with Hospital Mortality

Table 2a

|                         | Unadjusted<br>Odds Ratio | Adjusted Odds<br>Ratio (AOR) | 95% Confidence Interval<br>for AOR | P for AOR |
|-------------------------|--------------------------|------------------------------|------------------------------------|-----------|
| -Age, per year          | <u>-1.04</u>             | 1.05                         | 1.01-1.09                          | 0.018     |
| -Need for MV            | 8.14                     | 8.82                         | 2.74-28.46                         | 0.001     |
| -Appropriate therapy    | 0.16                     | 0.13                         | 0.03-0.47                          | 0.002     |
| -Use of<br>Azithromycin | 0.20                     | 0.26                         | 0.08-0.80                          | 0.018     |

Abbreviations: MV – mechanical ventilation.

## Sensitivity Analysis for Mortality

Table 2b

|                                       | Unadjusted Odds<br>Ratio | Adjusted Odds<br>Ratio (AOR) | 95% Confidence<br>Interval for AOR | P for<br>AOR |
|---------------------------------------|--------------------------|------------------------------|------------------------------------|--------------|
| -Age, per year                        | <u>1.05</u>              | 1.02                         | 0.98-1.05                          | 0.368        |
| -CURB-65 score, per<br>point increase | <u>2.43</u>              | 2.07                         | 1.32-3.25                          | 0.001        |
| -Appropriate therapy                  | 0.16                     | 0.12                         | 0.03-0.42                          | 0.001        |
| -Use of Azithromycin                  | 0.20                     | 0.34                         | 0.11-0.88                          | 0.041        |

1  
2  
3  
4  
5  
6  
7  
8  
9  
10  
11  
12  
13  
14  
15  
16  
17  
18  
19  
20  
21  
22  
23  
24  
25  
26  
27  
28  
29  
30  
31  
32  
33  
34  
35  
36  
37  
38  
39  
40  
41  
42  
43  
44  
45  
46  
47  
48  
49  
50  
51  
52  
53  
54  
55  
56  
57  
58  
59  
60

For peer review only

# Hospital Mortality and Azithromycin Treatment

## Figure 1.

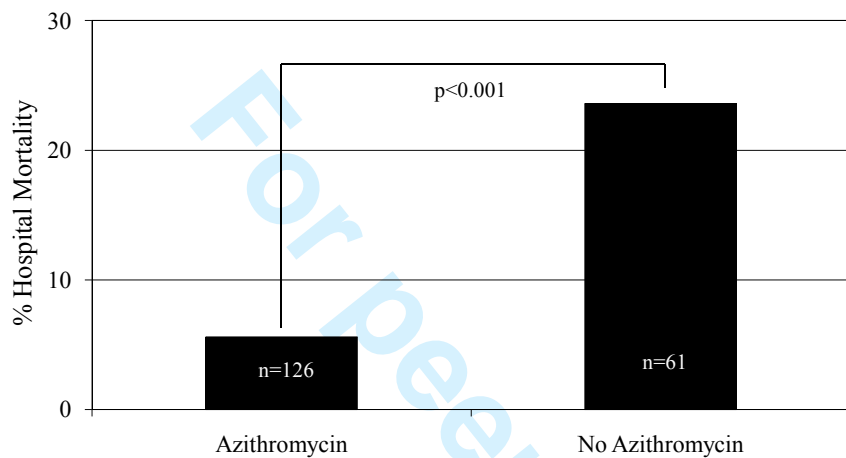

Odds Ratio for Death with Azithromycin: 0.20 (94% CI: 0.08-0.52)

For peer review only
